# Supplementary material
Source: ML conference proceedings conference paper supplement (https://openreview.net/forum?id=FrtkfqD4bCc-)
Supplement: supplementary_material [file attachment]

|                        | PROBLEM STATISTICS |      |    |         | AOBB-UFO |          |         | UAI 2022 COMPETITION COMPETING SOLVERS |         |         |          |         |         |         |  |
|------------------------|--------------------|------|----|---------|----------|----------|---------|----------------------------------------|---------|---------|----------|---------|---------|---------|--|
| Problem                | X  ;  F            | w*   | k  | Anytime | Time     | Solution | braobb  | daoopt-lh                              | daoopt  | lbp     | toulbar2 |         |         | uai14   |  |
|                        |                    |      |    |         |          |          |         |                                        |         |         | ipr      | vacint  | vns     |         |  |
| ImageAlignment_11      | 350 ; 3563         | 33   | 77 | 25.5    | 108.67   | -1005.8  | -824.2  | -824.2                                 | -824.2  | -824.2  | -824.2   | -824.2  | -824.2  | -824.2  |  |
| ImageAlignment_12      | 30 ; 465           | 29   | 58 | 5.3     | 5.28     | -436.7   | -436.7  | -436.7                                 | -436.7  | -436.7  | -436.7   | -436.7  | -436.7  | -436.7  |  |
| ImageAlignment_13      | 400 ; 3334         | 21   | 83 | 78      | 128.24   | -3081.4  | -2998.9 | -2999.8                                | -2999.8 | -2998.9 | -2999.8  | -2999.8 | -2999.8 | -2998.9 |  |
| ImageAlignment_14      | 200 ; 2128         | 23   | 69 | 9.1     | 12.89    | -1632    | -1557.5 | -1557.5                                | -1557.5 | -1557.5 | -1557.5  | -1557.5 | -1557.5 | -1557.5 |  |
| ImageAlignment_15      | 300 ; 2732         | 23   | 68 | 59.7    | 415.05   | -1339.5  | -1177.5 | -1177.5                                | -1177.5 | -1177.5 | -1177.5  | -1177.5 | -1177.5 |         |  |
| ObjectDetection_13     | 60 ; 1830          | 59   | 21 | 6.2     | 3606.1   | -528.6   | 6684.3  | 9967.7                                 | 9854.2  | 8826.5  | 9970.6   | 9970.6  | 9970.6  | 8883.1  |  |
| ObjectDetection_14     | 60 ; 1830          | 59   | 11 | 31.6    | 3631.1   | 236.6    | 6712.5  | 9020.8                                 | 9020.8  | 8341.9  | 9093.7   | 9093.7  | 9093.7  | 8562.9  |  |
| ObjectDetection_15     | 60 ; 1830          | 59   | 16 | 2155.8  | 3637     | -404     | 10628   | 11703.8                                | 12479   | 11544   | 12633    | 12633   | 12633   | 11976   |  |
| ObjectDetection_16     | 60 ; 1830          | 59   | 21 | 1753.5  | 3606.2   | -471     | 12023   | 14154.2                                | 13536   | 13548   | 14347    | 14347   | 14347   | 14022   |  |
| ObjectDetection_17     | 60 ; 1830          | 59   | 11 | 30.6    | 3630.5   | -335.9   | 2454.9  | 4716.4                                 | 4816    | 3794.9  | 4887.4   | 4887.4  | 4887.4  | 4518.2  |  |
| or_chain_11.fg.Q0.5.I3 | 900 ; 915          | 191  | 2  | 30.8    | 30.85    | -22.9    |         |                                        |         |         |          |         |         |         |  |
| or_chain_16.fg.Q0.5.I3 | 1675 ; 1700        | 318  | 2  | 98.5    | 98.52    | -38.1    | -53.8   | -25.2                                  | -23.4   |         | -23.4    | -23.4   | -23.4   |         |  |
| or_chain_22.fg.Q0.5.I3 | 1044 ; 1054        | 196  | 2  | 28.9    | 28.92    | -15.3    |         |                                        |         |         |          |         |         |         |  |
| or_chain_24.fg.Q0.5.I3 | 1155 ; 1171        | 247  | 2  | 32.3    | 32.31    | -24.4    |         |                                        |         |         |          |         |         |         |  |
| or_chain_25.fg.Q0.5.I3 | 1075 ; 1086        | 88   | 2  | 30.4    | 30.37    | -16.8    |         |                                        |         |         |          |         |         |         |  |
| or_chain_32.fg.Q0.5.I3 | 1466 ; 1478        | 108  | 2  | 32      | 3632     |          |         |                                        |         |         |          |         |         |         |  |
| or_chain_36.fg.Q0.5.I3 | 933 ; 943          | 91   | 2  | 30.5    | 30.46    | -15.3    |         |                                        |         |         |          |         |         |         |  |
| or_chain_39.fg.Q0.5.I3 | 1751 ; 1766        | 430  | 2  | 96.3    | 96.32    | -22.9    |         |                                        |         |         |          |         |         |         |  |
| or_chain_40.fg.Q0.5.I3 | 988 ; 998          | 96   | 2  | 16.3    | 16.26    | -15.1    |         |                                        |         |         |          |         |         |         |  |
| or_chain_41.fg.Q0.5.I3 | 1847 ; 1863        | 203  | 2  | 118.5   | 3645     | -27      |         |                                        |         |         |          |         |         |         |  |
| or_chain_43.fg.Q0.5.I3 | 1692 ; 1712        | 216  | 2  | 44.5    | 44.5     | -30.5    |         |                                        |         |         |          |         |         |         |  |
| or_chain_6.fg.Q0.5.I3  | 1849 ; 1876        | 386  | 2  | 2351.2  | 3710.9   | -41.2    |         |                                        |         |         |          |         |         |         |  |
| or_chain_60.fg.Q0.5.I3 | 1997 ; 2023        | 552  | 2  | 3691.2  | 3736.6   | -42.8    |         |                                        |         |         |          |         |         |         |  |
| or_chain_63.fg.Q0.5.I3 | 731 ; 744          | 97   | 2  | 26.3    | 26.35    | -10.8    |         |                                        |         |         |          |         |         |         |  |
| or_chain_8.fg.Q0.5.I3  | 1195 ; 1203        | 63   | 2  | 23.6    | 23.58    | -12.2    |         |                                        |         |         |          |         |         |         |  |
| pedigree1.Q0.5.I3      | 298 ; 334          | 105  | 4  | 3319.4  | 3641.4   | -35.2    |         | -35.9                                  | -37.3   |         | -35.7    | -35.7   | -36.1   | -37.8   |  |
| pedigree13.Q0.5.I1     | 888 ; 1077         | 138  | 3  | 2941.6  | 3623.5   | -63.1    |         | -62.8                                  | -62.4   |         | -62.8    | -62.7   | -62.5   |         |  |
| pedigree18.Q0.5.I1     | 931 ; 1184         | 181  | 5  | 38.8    | 3638.8   |          |         | -112.5                                 | -111.9  |         | -112.5   | -112.9  | -113.5  | -116.4  |  |
| pedigree19.Q0.5.I4     | 693 ; 793          | 173  | 5  | 3280    | 3625.2   | -97.5    | -95.3   | -89.5                                  | -87.5   |         | -87.1    | -89.5   | -89.6   |         |  |
| pedigree20.Q0.5.I2     | 387 ; 437          | 76   | 5  | 2455.1  | 3614.7   |          |         | -46.8                                  | -46.7   |         | -47.9    | -46.1   | -46.1   | -72.8   |  |
| pedigree25.Q0.5.I2     | 993 ; 1289         | 178  | 5  | 3236.3  | 3702.4   | -148.7   | -154.6  | -148.5                                 | -147.8  |         | -147.6   | -147.3  | -147.8  | -170    |  |
| pedigree30.Q0.5.I2     | 1015 ; 1289        | 109  | 5  | 30.9    | 3630.9   |          |         | -123.6                                 | -124.7  |         | -123.6   | -123.1  | -124.3  | -140.8  |  |
| pedigree31.Q0.5.I2     | 1006 ; 1183        | 153  | 5  | 16      | 3616     |          | -118.4  | -116.2                                 | -116    |         | -117     | -117.6  | -115.6  | -161.1  |  |
| pedigree33.Q0.5.I2     | 581 ; 798          | 118  | 4  | 28.7    | 3628.7   |          | -69.4   | -70.3                                  | -70.9   |         | -71      | -70.4   | -71.1   |         |  |
| pedigree38.Q0.5.I2     | 581 ; 724          | 164  | 5  | 115.5   | 3621.9   | -94.2    | -91.4   | -78.2                                  | -77.6   |         | -77.5    | -77.6   | -77.8   | -90.5   |  |
| pedigree41.Q0.5.I2     | 885 ; 1062         | 205  | 5  | 27.5    | 3620.7   | -117     |         | -105.6                                 | -107.3  |         | -106.8   | -107.7  | -108.2  | -160.7  |  |
| pedigree44.Q0.5.I4     | 644 ; 811          | 186  | 4  | 3177.3  | 3628.3   | -89.3    | -98.2   | -89.1                                  | -88.5   |         | -89.1    | -89.4   | -89.7   |         |  |
| pedigree50.Q0.5.I1     | 478 ; 514          | 124  | 6  | 214.5   | 3677.4   | -51.5    | -55.7   | -52.4                                  | -52.8   |         | -53.1    | -53.1   | -52     | -69.6   |  |
| pedigree7.Q0.5.I2      | 867 ; 1068         | 89   | 4  | 3579.1  | 3628.3   | -103.8   |         | -97.5                                  | -97.6   |         | -98.4    | -98     | -98.3   | -136.4  |  |
| pedigree9.Q0.5.I3      | 935 ; 1118         | 235  | 7  | 913.3   | 3626.6   | -123.9   |         | -113.8                                 | -113.7  |         | -113.4   | -112.7  | -114    | -159    |  |
| pomdp10-12_7_3_8_4     | 2673 ; 2701        | 2599 | 32 |         |          |          | 1.2     | 1.2                                    | 1.2     | 1.2     | 1.2      | 1.2     | 1.2     | 1.2     |  |
| pomdp6-12_6_2_6_3      | 250 ; 265          | 198  | 18 | 63.9    | 3663.9   | 0.9      | 1       | 1                                      | 1       | 1       | 1        | 1       | 1       | 1       |  |
| pomdp7-20_10_2_10_3    | 3166 ; 3193        |      |    |         |          |          |         |                                        |         |         |          |         |         |         |  |
| pomdp8-14_9_3_12_4     | 2145 ; 2189        | 2057 | 48 |         |          |          | 1.4     | 1.4                                    | 1.4     | 1.4     | 1.4      | 1.4     | 1.4     | 1.4     |  |
| pomdp9-14_8_3_10_4     | 5277 ; 5313        |      |    |         |          |          |         |                                        |         |         |          |         |         |         |  |
| ProteinFolding_11      | 400 ; 1160         | 28   | 2  | 22.4    | 22.44    | 1926.6   | 1962.3  | 1962.3                                 | 1962.3  | 1839.4  | 1962.3   | 1959.7  | 1944.8  | 1528.7  |  |
| ProteinFolding_12      | 250 ; 2098         | 20   | 60 | 10      | 13.34    | -1586.4  | -1547   | -1547                                  | -1547   | -1548   | -1547    | -1547   | -1547   |         |  |
| ProteinFolding_13      | 100 ; 1055         | 21   | 92 | 24.5    | 24.56    | -143.3   | -143.3  | -143.3                                 | -143.3  | -143.3  | -143.3   | -143.3  | -143.3  | -143.3  |  |
| ProteinFolding_14      | 80 ; 847           | 20   | 49 | 12.6    | 12.61    | -331.7   | -331.7  | -331.7                                 | -331.7  | -331.7  | -331.7   | -331.7  | -331.7  | -331.7  |  |
| ProteinFolding_15      | 50 ; 536           | 22   | 47 | 10      | 9.97     | -51.6    | -51.6   | -51.6                                  | -51.6   | -51.6   | -51.6    | -51.6   | -51.6   | -51.6   |  |
| Segmentation_11        | 228 ; 852          | 19   | 21 | 6.4     | 135.02   | -152.1   | -132.1  | -132.3                                 | -132.3  | -133.3  | -132.3   | -132.3  | -132.3  | -133.4  |  |
| Segmentation_12        | 231 ; 856          | 20   | 2  | 2.9     | 2.88     | -36.7    | -21.9   | -21.9                                  | -21.9   | -30.1   | -21.9    | -21.9   | -21.9   | -21.9   |  |
| Segmentation_13        | 225 ; 832          | 18   | 2  | 3.8     | 3.76     | -28.9    | -21.4   | -21.4                                  | -21.4   | -21.4   | -21.4    | -21.4   | -21.4   | -21.4   |  |
| Segmentation_14        | 231 ; 863          | 18   | 2  | 3       | 2.96     | -40.2    | -39.3   | -39.3                                  | -39.3   | -40.2   | -39.3    | -39.3   | -39.3   | -39.8   |  |
| Segmentation_15        | 229 ; 851          | 18   | 21 | 6.9     | 336.2    | -182.9   | -169.6  | -163.8                                 | -163.8  | -168.5  | -163.8   | -163.8  | -163.8  | -168.8  |  |
| Segmentation_16        | 228 ; 838          | 18   | 2  | 2.9     | 2.94     | -42.5    | -40.4   | -40.4                                  | -40.4   | -40.4   | -40.4    | -40.4   | -40.4   | -40.8   |  |
| Segmentation_17        | 225 ; 837          | 20   | 21 | 10.2    | 23.49    | -184.1   | -176.2  | -174.3                                 | -174.3  | -175.3  | -174.3   | -174.3  | -174.3  | -175.7  |  |
| Segmentation_18        | 235 ; 882          | 20   | 2  | 3       | 3.04     | -44.8    | -34     | -34                                    | -34     | -35.9   | -34      | -34     | -34     | -34     |  |
| Segmentation_19        | 228 ; 852          | 20   | 2  | 3.1     | 3.06     | -32.6    | -24.1   | -24.1                                  | -24.1   | -25.4   | -24.1    | -24.1   | -24.1   | -24.1   |  |
| Segmentation_20        | 232 ; 867          | 21   | 21 | 8.2     | 3199.8   | -138.1   | -112    | -112                                   | -112    | -112.4  | -112     | -112    | -112    | -113.5  |  |
| wcsp_14                | 301 ; 19161        | 48   | 8  | 68.1    | 75.36    | 1.5      | -29.2   | -9.6                                   | 1.1     | -402.4  | 1.1      | 1.1     | 1.1     | -20.9   |  |
| wcsp_15                | 125 ; 736          | 66   | 4  | 16.3    | 3610.4   | -162     | -163.6  | -80                                    | -74.6   | -1503.1 | -75.4    | -78.6   | -83.4   | -193.8  |  |
| wcsp_16                | 200 ; 1970         | 57   | 44 | 8.9     | 3608.9   |          | -5.3    | 4.8                                    | 23.1    | -251.5  | 22.9     | 22.8    | 23.2    | -8.5    |  |
| wcsp_17                | 340 ; 3417         | 95   | 44 | 12.1    | 3612.1   |          | -101.8  | 8.3                                    | 33.6    | -549.1  | 34.9     | 35      | 34.8    |         |  |
| wcsp_18                | 239 ; 18016        | 38   | 24 | 80.4    | 80.47    | 1.1      | -540    | -24.1                                  | 0.2     | -16     | 0.2      | 0.2     | 0.2     | -16.9   |  |
