# Supplementary material
Source: ML conference proceedings conference paper supplement (https://openreview.net/forum?id=FrtkfqD4bCc-)
Supplement: supplementary_material [file attachment]

|        |                   |      |    |    |             |              |         |         |
|--------|-------------------|------|----|----|-------------|--------------|---------|---------|
| tuning | ProteinFolding_19 | 0.5  | 6  | 59 | 4.8559E-101 | 1324.085264  | 64.62   | 3632.13 |
| tuning | ProteinFolding_19 | 0.01 | 6  | 59 | 9.7119E-103 | 1324.085264  | 64.65   | 3632.12 |
| tuning | ProteinFolding_20 | 0.01 | 5  | 59 | 9.5304E-103 | 4544.871198  | 70.72   | 3638.29 |
| tuning | ProteinFolding_20 | 0.5  | 5  | 59 | 4.7652E-101 | 4544.871198  | 71.05   | 3638.71 |
| tuning | ProteinFolding_20 | 0.1  | 5  | 59 | 9.5304E-102 | 4544.871198  | 71.78   | 3638.59 |
| tuning | ProteinFolding_20 | 1    | 5  | 59 | 9.5304E-101 | 4544.871198  | 72.11   | 3638.73 |
| tuning | ProteinFolding_21 | 0.1  | 5  | 59 | 9.5304E-102 | 5982.050015  | 316.97  | 3742.91 |
| tuning | ProteinFolding_21 | 1    | 5  | 59 | 9.5304E-101 | 5982.050015  | 317.55  | 3742.6  |
| tuning | ProteinFolding_21 | 0.01 | 5  | 59 | 9.5304E-103 | 5982.050015  | 318.47  | 3743    |
| tuning | ProteinFolding_21 | 0.5  | 5  | 59 | 4.7652E-101 | 5982.050015  | 318.89  | 3743.15 |
| tuning | ProteinFolding_22 | 1    | 5  | 59 | 9.519E-101  | 9591.369382  | 325.47  | 3744.91 |
| tuning | ProteinFolding_22 | 0.1  | 5  | 59 | 9.519E-102  | 9591.369382  | 325.73  | 3744.71 |
| tuning | ProteinFolding_22 | 0.01 | 5  | 59 | 9.519E-103  | 9591.369382  | 326.61  | 3745.99 |
| tuning | ProteinFolding_22 | 0.5  | 5  | 59 | 4.7595E-101 | 9591.369382  | 328.84  | 3745.55 |
| tuning | ProteinFolding_23 | 0.01 | 6  | 59 | 9.5295E-103 | 1678.191833  | 63.85   | 3631.99 |
| tuning | ProteinFolding_23 | 0.1  | 6  | 59 | 9.5295E-102 | 1678.191833  | 64.08   | 3632.05 |
| tuning | ProteinFolding_23 | 1    | 6  | 59 | 9.5295E-101 | 1678.191833  | 64.14   | 3632.09 |
| tuning | ProteinFolding_23 | 0.5  | 6  | 59 | 4.7647E-101 | 1678.191833  | 64.17   | 3632.23 |
| tuning | ProteinFolding_24 | 1    | 5  | 59 | 9.5295E-101 | 2898.04158   | 71.22   | 3638.6  |
| tuning | ProteinFolding_24 | 0.01 | 5  | 59 | 9.5295E-103 | 2898.04158   | 71.58   | 3638.61 |
| tuning | ProteinFolding_24 | 0.1  | 5  | 59 | 9.5295E-102 | 2898.04158   | 71.72   | 3638.78 |
| tuning | ProteinFolding_24 | 0.5  | 5  | 59 | 4.7647E-101 | 2898.04158   | 71.75   | 3638.87 |
| tuning | ProteinFolding_25 | 0.01 | 5  | 59 | 9.5029E-103 | 7861.50169   | 320.31  | 3746.87 |
| tuning | ProteinFolding_25 | 1    | 5  | 59 | 9.5029E-101 | 7861.50169   | 320.69  | 3746.79 |
| tuning | ProteinFolding_25 | 0.1  | 5  | 59 | 9.5029E-102 | 7861.50169   | 320.7   | 3746.07 |
| tuning | ProteinFolding_25 | 0.5  | 5  | 59 | 4.7514E-101 | 7861.50169   | 322.45  | 3746.52 |
| tuning | Segmentation_11   | 0.01 | 5  | 19 | 0.00219671  | -132.0918238 | 52.39   | 152.64  |
| tuning | Segmentation_11   | 0.1  | 5  | 19 | 0.0219671   | -132.1831054 | 39.36   | 54.75   |
| tuning | Segmentation_11   | 0.5  | 5  | 19 | 0.109835    | -141.5264143 | 41.79   | 58.99   |
| tuning | Segmentation_11   | 1    | 5  | 19 | 0.219671    | -155.0921135 | 34.22   | 49.52   |
| tuning | Segmentation_12   | 0.01 | 21 | 20 | 0.00268962  | -21.92436747 |         | 3.02    |
| tuning | Segmentation_12   | 0.1  | 21 | 20 | 0.0268962   | -23.00189278 |         | 2.98    |
| tuning | Segmentation_12   | 0.5  | 21 | 20 | 0.134481    | -24.55743995 |         | 2.97    |
| tuning | Segmentation_12   | 1    | 21 | 20 | 0.268962    | -37.11936827 |         | 3.03    |
| tuning | Segmentation_13   | 0.01 | 19 | 18 | 0.00259491  | -21.37045842 |         | 3.83    |
| tuning | Segmentation_13   | 0.1  | 19 | 18 | 0.0259491   | -21.37045842 |         | 3.75    |
| tuning | Segmentation_13   | 0.5  | 19 | 18 | 0.129745    | -21.37474379 |         | 3.77    |
| tuning | Segmentation_13   | 1    | 19 | 18 | 0.259491    | -30.09601275 |         | 3.85    |
| tuning | Segmentation_14   | 0.01 | 19 | 18 | 0.00252815  | -39.27893074 |         | 2.89    |
| tuning | Segmentation_14   | 0.1  | 19 | 18 | 0.0252815   | -39.27893074 |         | 2.92    |
| tuning | Segmentation_14   | 0.5  | 19 | 18 | 0.126408    | -39.29457324 |         | 2.93    |
| tuning | Segmentation_14   | 1    | 19 | 18 | 0.252815    | -40.28756542 |         | 3       |
| tuning | Segmentation_15   | 0.01 | 5  | 18 | 0.00220046  | -163.6616216 | 3012.16 | 3631.4  |
| tuning | Segmentation_15   | 0.1  | 5  | 18 | 0.0220046   | -163.7544401 | 455.83  | 3049.4  |
| tuning | Segmentation_15   | 0.5  | 5  | 18 | 0.110023    | -171.9476276 | 38.16   | 537.92  |
| tuning | Segmentation_15   | 1    | 5  | 18 | 0.220046    | -185.393531  | 31.24   | 165.54  |
| tuning | Segmentation_16   | 0.01 | 19 | 18 | 0.00259246  | -40.44452982 |         | 2.91    |
| tuning | Segmentation_16   | 0.1  | 19 | 18 | 0.0259246   | -40.44629301 |         | 2.77    |
| tuning | Segmentation_16   | 0.5  | 19 | 18 | 0.129623    | -40.4684486  |         | 2.93    |
| tuning | Segmentation_16   | 1    | 19 | 18 | 0.259246    | -42.78133801 |         | 2.99    |
| tuning | Segmentation_17   | 0.01 | 5  | 20 | 0.00244133  | -174.8149053 | 631.66  | 3630.39 |
| tuning | Segmentation_17   | 0.1  | 5  | 20 | 0.0244133   | -174.933221  | 223.71  | 3629.88 |
| tuning | Segmentation_17   | 0.5  | 5  | 20 | 0.122066    | -179.2991144 | 35.35   | 768.44  |
| tuning | Segmentation_17   | 1    | 5  | 20 | 0.244133    | -186.9708827 | 30.41   | 32.6    |
