# Supplementary material
Source: ML conference proceedings conference paper supplement (https://openreview.net/forum?id=FrtkfqD4bCc-)
Supplement: supplementary_material [file attachment]

|       |             |      |    |    |            |              |         |         |
|-------|-------------|------|----|----|------------|--------------|---------|---------|
| final | pedigree44  | 0.5  | 20 | 27 | 0.0078525  | -96.9744412  | 30.56   | 59.03   |
| final | pedigree44  | 0.01 | 20 | 27 | 0.00015705 | -96.9744412  | 30.6    | 59.05   |
| final | pedigree44  | 0.1  | 20 | 27 | 0.0015705  | -96.9744412  | 30.63   | 59.18   |
| final | pedigree51  | 1    | 20 | 47 | 0.036025   | -109.7992197 | 212.58  | 3611.82 |
| final | pedigree51  | 0.1  | 20 | 47 | 0.0036025  | -109.7992197 | 217.47  | 3611.77 |
| final | pedigree51  | 0.01 | 20 | 47 | 0.00036025 | -109.7992197 | 217.76  | 3611.8  |
| final | pedigree51  | 0.5  | 20 | 47 | 0.0180125  | -109.7992197 | 219.36  | 3611.87 |
| final | pedigree7   | 1    | 18 | 43 | 0.043195   | -115.8186192 | 2927.09 | 3613.44 |
| final | pedigree7   | 0.5  | 18 | 43 | 0.0215975  | -115.8186192 | 2994.91 | 3613.36 |
| final | pedigree7   | 0.01 | 18 | 43 | 0.00043195 | -115.8186192 | 3043.41 | 3613.47 |
| final | pedigree7   | 0.1  | 18 | 43 | 0.0043195  | -115.8186192 | 3068.93 | 3613.44 |
| final | pedigree9   | 1    | 20 | 32 | 0.013045   | -122.9038601 | 485.28  | 904.22  |
| final | pedigree9   | 0.1  | 20 | 32 | 0.0013045  | -122.9038601 | 570.69  | 1014.39 |
| final | pedigree9   | 0.01 | 20 | 32 | 0.00013045 | -122.9038601 | 570.72  | 1012.94 |
| final | Promedas_60 | 1    | 25 | 34 | 0.0002     | -10.03646616 | 13.12   | 13.2    |
| final | Promedas_60 | 0.5  | 25 | 34 | 0.0001     | -10.03646616 | 15.12   | 15.33   |
| final | Promedas_60 | 0.1  | 25 | 34 | 0.00002    | -10.03646616 | 15.92   | 16.18   |
| final | Promedas_60 | 0.01 | 25 | 34 | 0.000002   | -10.03646616 | 16.32   | 16.6    |
| final | Promedas_61 | 0.01 | 23 | 47 | 0.0003     | -6.90667048  | 11.05   | 11.29   |
| final | Promedas_61 | 0.5  | 23 | 47 | 0.015      | -10.68402217 | 8.97    | 8.97    |
| final | Promedas_61 | 0.1  | 23 | 47 | 0.003      | -10.68402217 | 9.06    | 9.06    |
| final | Promedas_61 | 1    | 23 | 47 | 0.03       | -10.68402217 | 9.07    | 9.07    |
| final | Promedas_62 | 0.1  | 24 | 35 | 0.003      | -4.665398548 | 11.17   | 11.17   |
| final | Promedas_62 | 0.5  | 24 | 35 | 0.015      | -4.665398548 | 11.17   | 11.17   |
| final | Promedas_62 | 1    | 24 | 35 | 0.03       | -4.665398548 | 11.22   | 11.22   |
| final | Promedas_62 | 0.01 | 24 | 35 | 0.0003     | -4.665398548 | 11.3    | 11.34   |
| final | Promedas_63 | 1    | 23 | 45 | 0.03       | -6.09336204  | 11.05   | 11.05   |
| final | Promedas_63 | 0.5  | 23 | 45 | 0.015      | -6.09336204  | 11.06   | 11.06   |
| final | Promedas_63 | 0.1  | 23 | 45 | 0.003      | -6.09336204  | 11.07   | 11.07   |
| final | Promedas_63 | 0.01 | 23 | 45 | 0.0003     | -6.09336204  | 12.3    | 12.32   |
| final | Promedas_64 | 1    | 23 | 43 | 0.0002     | -11.46978612 | 7.67    | 7.67    |
| final | Promedas_64 | 0.5  | 23 | 43 | 0.0001     | -11.46978612 | 8.5     | 8.51    |
| final | Promedas_64 | 0.1  | 23 | 43 | 0.00002    | -11.46978612 | 9.26    | 9.26    |
| final | Promedas_64 | 0.01 | 23 | 43 | 0.000002   | -11.46978612 | 9.48    | 9.48    |
| final | Promedas_65 | 0.01 | 25 | 28 | 0.0003     | -5.156746083 | 11.47   | 11.47   |
| final | Promedas_65 | 0.1  | 25 | 28 | 0.003      | -7.359978813 | 11.45   | 11.45   |
| final | Promedas_65 | 0.5  | 25 | 28 | 0.015      | -7.646418273 | 11.4    | 11.4    |
| final | Promedas_65 | 1    | 25 | 28 | 0.03       | -7.646418273 | 11.55   | 11.55   |
| final | Promedas_66 | 0.01 | 24 | 39 | 0.0003     | -10.39210404 | 10.48   | 10.74   |
| final | Promedas_66 | 0.1  | 24 | 39 | 0.003      | -16.32159753 | 10.26   | 10.26   |
| final | Promedas_66 | 0.5  | 24 | 39 | 0.015      | -16.78412825 | 10.2    | 10.2    |
| final | Promedas_66 | 1    | 24 | 39 | 0.03       | -16.78412825 | 10.24   | 10.24   |
| final | Promedas_67 | 0.01 | 24 | 53 | 0.0003     | -15.21891111 | 20.78   | 20.93   |
| final | Promedas_67 | 0.1  | 24 | 53 | 0.003      | -17.48554284 | 14.2    | 14.2    |
| final | Promedas_67 | 0.5  | 24 | 53 | 0.015      | -18.3120652  | 14.12   | 14.12   |
| final | Promedas_67 | 1    | 24 | 53 | 0.03       | -18.3120652  | 14.22   | 14.22   |
| final | Promedas_68 | 1    | 24 | 41 | 0.0002     | -18.94074817 | 11.35   | 11.57   |
| final | Promedas_68 | 0.5  | 24 | 41 | 0.0001     | -18.94074817 | 12.28   | 12.67   |
| final | Promedas_68 | 0.1  | 24 | 41 | 0.00002    | -18.94074817 | 12.81   | 13.38   |
| final | Promedas_68 | 0.01 | 24 | 41 | 0.000002   | -18.94074817 | 12.96   | 13.59   |
| final | Promedas_69 | 0.5  | 25 | 35 | 0.0001     | -11.19236023 | 12.41   | 12.41   |
| final | Promedas_69 | 0.1  | 25 | 35 | 0.00002    | -11.19236023 | 12.72   | 12.72   |
| final | Promedas_69 | 0.01 | 25 | 35 | 0.000002   | -11.19236023 | 12.77   | 12.77   |
| final | Promedas_69 | 1    | 25 | 35 | 0.0002     | -11.39110656 | 11.95   | 11.95   |
