# Supplementary material
Source: ML conference proceedings conference paper supplement (https://openreview.net/forum?id=FrtkfqD4bCc-)
Supplement: supplementary_material [file attachment]

| problem | Algorithm      | Solution (t=0) | Anytime       | Time           | Wild Type | BBK* Solution | BBK* Time |
|---------|----------------|----------------|---------------|----------------|-----------|---------------|-----------|
| 00021   | ufo-kstar-aobb | <b>11.92</b>   | <b>190.87</b> | 1734.24        | 9.37      | 11.72         | 625.40    |
| 00021   | kstar-aobb-dh  | <b>11.92</b>   | 623.40        | <b>3612.39</b> | 9.37      | 11.72         | 625.40    |
| 00021   | kstar-aobb     | 11.72          | 265.74        | <b>3767.42</b> | 9.37      | 11.72         | 625.40    |
| 00025   | kstar-aobb-dh  | <b>16.18</b>   | <b>81.32</b>  | <b>357.31</b>  | 10.74     | 13.65         | 1013.20   |
| 00025   | kstar-aobb     | <b>16.18</b>   | 186.79        | <b>432.85</b>  | 10.74     | 13.65         | 1013.20   |
| 00025   | ufo-kstar-aobb | 13.65          | 166.69        | <b>170.1</b>   | 10.74     | 13.65         | 1013.20   |
| 00007   | ufo-kstar-aobb | <b>14.75</b>   | 2481.56       | <b>3615.49</b> | 14.08     | 14.73         | 399.60    |
| 00007   | kstar-aobb-dh  | 14.73          | 21.08         | <b>3612.07</b> | 14.08     | 14.73         | 399.60    |
| 00007   | kstar-aobb     | 14.73          | 30.01         | <b>3611.8</b>  | 14.08     | 14.73         | 399.60    |
| 00013   | kstar-aobb-dh  | 15.03          | <b>21.88</b>  | 77.4           | 13.25     | 15.03         | 43.80     |
| 00013   | ufo-kstar-aobb | 15.03          | 159.79        | 204.31         | 13.25     | 15.03         | 43.80     |
| 00013   | kstar-aobb     | 15.03          | 162.11        | 3758.3         | 13.25     | 15.03         | 43.80     |
| 00017   | ufo-kstar-aobb | <b>10.86</b>   | <b>154.63</b> | 2184.84        | 10.52     | 10.80         | 91.20     |
| 00017   | kstar-aobb-dh  | <b>10.86</b>   | 765.88        | <b>3613.3</b>  | 10.52     | 10.80         | 91.20     |
| 00017   | kstar-aobb     | <b>10.82</b>   | 2237.09       | <b>3747.79</b> | 10.52     | 10.80         | 91.20     |
| 00030   | ufo-kstar-aobb | <b>11.12</b>   | <b>21.51</b>  | 926.66         | 10.35     | 10.97         | 248.30    |
| 00030   | kstar-aobb     | <b>11.12</b>   | 260.21        | <b>3613.38</b> | 10.35     | 10.97         | 248.30    |
| 00030   | kstar-aobb-dh  | <b>11.12</b>   | 289.95        | <b>3613.62</b> | 10.35     | 10.97         | 248.30    |
