# Supplementary material
Source: ML conference proceedings conference paper supplement (https://openreview.net/forum?id=FrtkfqD4bCc-)
Supplement: supplementary_material [file attachment]

|       |                     |      |   |    |            |              |        |        |
|-------|---------------------|------|---|----|------------|--------------|--------|--------|
| final | satellite01ac.wcsp  | 0.01 | 8 | 19 | 0.00963625 | -0.0757557   | 58.87  | 58.88  |
| final | satellite02ac.wcsp  | 0.1  | 7 | 25 | 0.0982457  | -0.041276999 | 148.87 | 149.14 |
| final | satellite02ac.wcsp  | 0.01 | 7 | 25 | 0.00982457 | -0.041276999 | 149.1  | 149.36 |
| final | satellite02ac.wcsp  | 0.5  | 7 | 25 | 0.491228   | -0.041276999 | 149.61 | 149.87 |
| final | zenotravel04ac.wcsp | 1    | 5 | 32 | 0.965032   | -0.082509686 | 62.61  | 62.63  |
| final | zenotravel04ac.wcsp | 0.5  | 5 | 32 | 0.482516   | -0.082509686 | 62.93  | 63.24  |
| final | zenotravel04ac.wcsp | 0.01 | 5 | 32 | 0.00965032 | -0.082509686 | 62.94  | 63.25  |
| final | zenotravel04ac.wcsp | 0.1  | 5 | 32 | 0.0965032  | -0.082509686 | 63.1   | 63.4   |
