# Supplementary material
Source: ML conference proceedings conference paper supplement (https://openreview.net/forum?id=FrtkfqD4bCc-)
Supplement: supplementary_material [file attachment]

|       |                        |      |    |     |             |              |         |         |
|-------|------------------------|------|----|-----|-------------|--------------|---------|---------|
| final | ObjectDetection_14     | 1    | 6  | 59  | 9.5152E-101 | 6712.503515  | 63.58   | 3632.03 |
| final | ObjectDetection_14     | 0.5  | 6  | 59  | 4.7576E-101 | 6712.503515  | 63.76   | 3632.13 |
| final | ObjectDetection_14     | 0.01 | 6  | 59  | 9.5152E-103 | 6712.503515  | 63.85   | 3632    |
| final | ObjectDetection_14     | 0.1  | 6  | 59  | 9.5152E-102 | 6712.503515  | 63.88   | 3632.04 |
| final | ObjectDetection_15     | 0.01 | 5  | 59  | 9.5152E-103 | 10469.60491  | 73.01   | 3640.44 |
| final | ObjectDetection_15     | 1    | 5  | 59  | 9.5152E-101 | 10469.60491  | 73.27   | 3640.32 |
| final | ObjectDetection_15     | 0.5  | 5  | 59  | 4.7576E-101 | 10469.60491  | 73.72   | 3640.72 |
| final | ObjectDetection_15     | 0.1  | 5  | 59  | 9.5152E-102 | 10469.60491  | 74.6    | 3640.72 |
| final | ObjectDetection_16     | 0.1  | 5  | 59  | 9.5152E-102 | 12023.31726  | 323.62  | 3749.35 |
| final | ObjectDetection_16     | 1    | 5  | 59  | 9.5152E-101 | 12023.31726  | 324.34  | 3749.55 |
| final | ObjectDetection_16     | 0.01 | 5  | 59  | 9.5152E-103 | 12023.31726  | 324.66  | 3749.43 |
| final | ObjectDetection_16     | 0.5  | 5  | 59  | 4.7576E-101 | 12023.31726  | 327.53  | 3749.13 |
| final | ObjectDetection_17     | 0.1  | 6  | 59  | 9.5181E-102 | 2457.699449  | 3232.98 | 3631.71 |
| final | ObjectDetection_17     | 0.01 | 6  | 59  | 9.5181E-103 | 2457.699449  | 3257.71 | 3631.75 |
| final | ObjectDetection_17     | 0.5  | 6  | 59  | 4.759E-101  | 2457.699449  | 3264.33 | 3631.63 |
| final | ObjectDetection_17     | 1    | 6  | 59  | 9.5181E-101 | 2457.699449  | 3286.39 | 3631.72 |
| final | or_chain_11.fg.Q0.5.I3 | 0.01 | 22 | 191 | 0.0003      | -12.96253273 | 2041.68 | 2858.72 |
| final | or_chain_11.fg.Q0.5.I3 | 0.1  | 22 | 191 | 0.003       | -17.32655797 | 19.54   | 19.92   |
| final | or_chain_11.fg.Q0.5.I3 | 1    | 22 | 191 | 0.03        | -22.89619729 | 19.3    | 19.3    |
| final | or_chain_11.fg.Q0.5.I3 | 0.5  | 22 | 191 | 0.015       | -22.89619729 | 19.32   | 19.32   |
| final | or_chain_16.fg.Q0.5.I3 | 0.1  | 21 | 318 | 0.003       | -31.31330515 | 91.73   | 91.75   |
| final | or_chain_16.fg.Q0.5.I3 | 0.01 | 21 | 318 | 0.0003      | -35.91919766 | 3060.25 | 3691.6  |
| final | or_chain_16.fg.Q0.5.I3 | 1    | 21 | 318 | 0.03        | -38.11834498 | 91.32   | 91.32   |
| final | or_chain_16.fg.Q0.5.I3 | 0.5  | 21 | 318 | 0.015       | -38.11834498 | 92.57   | 92.58   |
| final | or_chain_22.fg.Q0.5.I3 | 0.01 | 22 | 196 | 0.0003      | -8.172342954 | 2227.94 | 2786.31 |
| final | or_chain_22.fg.Q0.5.I3 | 0.1  | 22 | 196 | 0.003       | -12.53796699 | 21.49   | 21.49   |
| final | or_chain_22.fg.Q0.5.I3 | 1    | 22 | 196 | 0.03        | -15.26878386 | 21.1    | 21.1    |
| final | or_chain_22.fg.Q0.5.I3 | 0.5  | 22 | 196 | 0.015       | -15.26878386 | 21.17   | 21.17   |
| final | or_chain_24.fg.Q0.5.I3 | 0.1  | 21 | 247 | 0.003       | -18.84866319 | 28.26   | 28.89   |
| final | or_chain_24.fg.Q0.5.I3 | 0.01 | 21 | 247 | 0.0003      | -21.28631162 | 1969.62 | 3627.84 |
| final | or_chain_24.fg.Q0.5.I3 | 0.5  | 21 | 247 | 0.015       | -24.41534033 | 27.71   | 27.71   |
| final | or_chain_24.fg.Q0.5.I3 | 1    | 21 | 247 | 0.03        | -24.41534033 | 27.74   | 27.75   |
| final | or_chain_25.fg.Q0.5.I3 | 0.01 | 22 | 88  | 0.0003      | -12.14888843 | 147.06  | 165.53  |
| final | or_chain_25.fg.Q0.5.I3 | 0.1  | 22 | 88  | 0.003       | -16.78419389 | 12.56   | 12.57   |
| final | or_chain_25.fg.Q0.5.I3 | 0.5  | 22 | 88  | 0.015       | -16.78691726 | 12.52   | 12.52   |
| final | or_chain_25.fg.Q0.5.I3 | 1    | 22 | 88  | 0.03        | -16.78691726 | 12.61   | 12.61   |
| final | or_chain_36.fg.Q0.5.I3 | 0.01 | 22 | 91  | 0.0003      | -9.669509326 | 78.08   | 80.3    |
| final | or_chain_36.fg.Q0.5.I3 | 0.1  | 22 | 91  | 0.003       | -15.13535825 | 13.61   | 13.63   |
| final | or_chain_36.fg.Q0.5.I3 | 0.5  | 22 | 91  | 0.015       | -15.26639126 | 13.62   | 13.62   |
| final | or_chain_36.fg.Q0.5.I3 | 1    | 22 | 91  | 0.03        | -15.26639126 | 13.65   | 13.65   |
| final | or_chain_39.fg.Q0.5.I3 | 0.1  | 21 | 430 | 0.003       | -20.17815206 | 87.91   | 91.56   |
| final | or_chain_39.fg.Q0.5.I3 | 1    | 21 | 430 | 0.03        | -22.89439508 | 87.3    | 87.3    |
| final | or_chain_39.fg.Q0.5.I3 | 0.5  | 21 | 430 | 0.015       | -22.89439508 | 87.94   | 87.94   |
| final | or_chain_39.fg.Q0.5.I3 | 0.01 | 21 | 430 | 0.0003      | -33.41989886 | 323.39  | 3687.12 |
| final | or_chain_40.fg.Q0.5.I3 | 0.01 | 22 | 96  | 0.0003      | -9.236264664 | 286.5   | 425.24  |
| final | or_chain_40.fg.Q0.5.I3 | 0.1  | 22 | 96  | 0.003       | -11.23384069 | 12.31   | 12.37   |
| final | or_chain_40.fg.Q0.5.I3 | 0.5  | 22 | 96  | 0.015       | -15.27959818 | 12.11   | 12.11   |
| final | or_chain_40.fg.Q0.5.I3 | 1    | 22 | 96  | 0.03        | -15.27959818 | 12.13   | 12.13   |
| final | or_chain_41.fg.Q0.5.I3 | 1    | 21 | 203 | 0.0002      | -27.02433286 | 123.06  | 3635.32 |
| final | or_chain_41.fg.Q0.5.I3 | 0.01 | 21 | 203 | 0.000002    | -27.32052776 | 3632.09 | 3635.45 |
| final | or_chain_41.fg.Q0.5.I3 | 0.1  | 21 | 203 | 0.00002     | -27.32063603 | 2432.61 | 3635.12 |
| final | or_chain_41.fg.Q0.5.I3 | 0.5  | 21 | 203 | 0.0001      | -28.911682   | 1337.9  | 3635.15 |
| final | or_chain_43.fg.Q0.5.I3 | 0.01 | 21 | 216 | 0.0003      | -27.23079775 | 2332.2  | 3637.77 |
| final | or_chain_43.fg.Q0.5.I3 | 0.1  | 21 | 216 | 0.003       | -28.47733203 | 38.69   | 39.53   |
