# Supplementary material
Source: ML conference proceedings conference paper supplement (https://openreview.net/forum?id=FrtkfqD4bCc-)
Supplement: supplementary_material [file attachment]

|       |                        |      |    |     |             |              |         |         |
|-------|------------------------|------|----|-----|-------------|--------------|---------|---------|
| final | pedigree7.Q0.5.I2      | 0.01 | 19 | 89  | 0.00043195  | -99.47529166 | 3214.83 | 3609.77 |
| final | pedigree7.Q0.5.I2      | 0.1  | 19 | 89  | 0.0043195   | -99.47529166 | 3230.87 | 3609.84 |
| final | pedigree7.Q0.5.I2      | 0.5  | 19 | 89  | 0.0215975   | -99.48474282 | 3183.61 | 3609.84 |
| final | pedigree7.Q0.5.I2      | 1    | 19 | 89  | 0.043195    | -99.54698552 | 3042.88 | 3609.85 |
| final | pedigree9.Q0.5.I3      | 1    | 17 | 235 | 0.013045    | -129.7561144 | 717.83  | 3614.44 |
| final | pedigree9.Q0.5.I3      | 0.1  | 17 | 235 | 0.0013045   | -131.2594165 | 418.65  | 3614.26 |
| final | pedigree9.Q0.5.I3      | 0.01 | 17 | 235 | 0.00013045  | -131.2594165 | 423.78  | 3614.38 |
| final | pedigree9.Q0.5.I3      | 0.5  | 17 | 235 | 0.0065225   | -131.2660916 | 421.12  | 3614.36 |
| final | pomdp6-12_6_2_6_3.mmap | 1    | 20 | 198 | 0.502648    | -8.334437215 | 46.8    | 3646.78 |
| final | ProteinFolding_11      | 0.01 | 24 | 28  | 2.1476E-07  | 1962.312184  | 10.55   | 10.55   |
| final | ProteinFolding_11      | 0.1  | 24 | 28  | 2.1476E-06  | 1958.081894  | 10.52   | 10.52   |
| final | ProteinFolding_11      | 0.5  | 24 | 28  | 0.000010738 | 1947.805818  | 10.44   | 10.44   |
| final | ProteinFolding_11      | 1    | 24 | 28  | 0.000021476 | 1925.060763  | 10.49   | 10.49   |
| final | ProteinFolding_12      | 0.01 | 4  | 20  | 4.75E-12    | -1547.035521 | 1614.79 | 1639.26 |
| final | ProteinFolding_12      | 0.1  | 4  | 20  | 4.75E-11    | -1547.035521 | 1617.2  | 1641.73 |
| final | ProteinFolding_12      | 1    | 4  | 20  | 4.75E-10    | -1547.035521 | 1619.63 | 1644.08 |
| final | ProteinFolding_12      | 0.5  | 4  | 20  | 2.375E-10   | -1547.035521 | 1632.53 | 1657.35 |
| final | ProteinFolding_13      | 0.5  | 4  | 21  | 4.76787E-05 | -143.3217616 | 24.19   | 24.21   |
| final | ProteinFolding_13      | 1    | 4  | 21  | 9.53574E-05 | -143.3217616 | 24.45   | 24.47   |
| final | ProteinFolding_13      | 0.01 | 4  | 21  | 9.53574E-07 | -143.3217616 | 24.47   | 24.49   |
| final | ProteinFolding_13      | 0.1  | 4  | 21  | 9.53574E-06 | -143.3217616 | 24.53   | 24.56   |
| final | ProteinFolding_14      | 0.5  | 4  | 20  | 4.99872E-05 | -331.7347758 | 13.26   | 13.28   |
| final | ProteinFolding_14      | 0.01 | 4  | 20  | 9.99743E-07 | -331.7347758 | 13.34   | 13.36   |
| final | ProteinFolding_14      | 0.1  | 4  | 20  | 9.99743E-06 | -331.7347758 | 13.48   | 13.5    |
| final | ProteinFolding_14      | 1    | 4  | 20  | 9.99743E-05 | -331.7347758 | 13.55   | 13.57   |
| final | ProteinFolding_15      | 0.5  | 5  | 22  | 0.00005     | -51.55163983 | 308.04  | 308.05  |
| final | ProteinFolding_15      | 0.01 | 5  | 22  | 0.000001    | -51.55163983 | 308.33  | 308.33  |
| final | ProteinFolding_15      | 0.1  | 5  | 22  | 0.00001     | -51.55163983 | 308.57  | 308.58  |
| final | ProteinFolding_15      | 1    | 5  | 22  | 0.0001      | -51.55163983 | 310.74  | 310.75  |
| final | Segmentation_11        | 0.01 | 5  | 19  | 0.00219671  | -132.0918238 | 52.38   | 153.57  |
| final | Segmentation_11        | 0.1  | 5  | 19  | 0.0219671   | -132.1831054 | 39.44   | 54.86   |
| final | Segmentation_11        | 0.5  | 5  | 19  | 0.109835    | -141.5264143 | 41.57   | 58.75   |
| final | Segmentation_11        | 1    | 5  | 19  | 0.219671    | -155.0921135 | 34.54   | 49.87   |
| final | Segmentation_12        | 0.01 | 21 | 20  | 0.00268962  | -21.92436747 |         | 3.04    |
| final | Segmentation_12        | 0.1  | 21 | 20  | 0.0268962   | -23.00189278 |         | 2.97    |
| final | Segmentation_12        | 0.5  | 21 | 20  | 0.134481    | -24.55743995 |         | 3.03    |
| final | Segmentation_12        | 1    | 21 | 20  | 0.268962    | -37.11936827 |         | 2.99    |
| final | Segmentation_13        | 0.01 | 19 | 18  | 0.00259491  | -21.37045842 |         | 3.81    |
| final | Segmentation_13        | 0.1  | 19 | 18  | 0.0259491   | -21.37045842 |         | 3.84    |
| final | Segmentation_13        | 0.5  | 19 | 18  | 0.129745    | -21.37474379 |         | 3.8     |
| final | Segmentation_13        | 1    | 19 | 18  | 0.259491    | -30.09601275 |         | 3.88    |
| final | Segmentation_14        | 0.01 | 19 | 18  | 0.00252815  | -39.27893074 |         | 2.87    |
| final | Segmentation_14        | 0.1  | 19 | 18  | 0.0252815   | -39.27893074 |         | 2.97    |
| final | Segmentation_14        | 0.5  | 19 | 18  | 0.126408    | -39.29457324 |         | 2.93    |
| final | Segmentation_14        | 1    | 19 | 18  | 0.252815    | -40.28756542 |         | 2.9     |
| final | Segmentation_15        | 0.01 | 5  | 18  | 0.00220046  | -163.6616216 | 3014.45 | 3631.43 |
| final | Segmentation_15        | 0.1  | 5  | 18  | 0.0220046   | -163.7544401 | 453.18  | 3026.4  |
| final | Segmentation_15        | 0.5  | 5  | 18  | 0.110023    | -171.9476276 | 37.04   | 539.09  |
| final | Segmentation_15        | 1    | 5  | 18  | 0.220046    | -185.393531  | 31.45   | 165.62  |
| final | Segmentation_16        | 0.01 | 19 | 18  | 0.00259246  | -40.44452982 |         | 2.82    |
| final | Segmentation_16        | 0.1  | 19 | 18  | 0.0259246   | -40.44629301 |         | 2.86    |
| final | Segmentation_16        | 0.5  | 19 | 18  | 0.129623    | -40.4684486  |         | 2.82    |
| final | Segmentation_16        | 1    | 19 | 18  | 0.259246    | -42.78133801 |         | 2.82    |
| final | Segmentation_17        | 0.01 | 5  | 20  | 0.00244133  | -174.8149053 | 621.37  | 3630.52 |
