# Supplementary material
Source: ML conference proceedings conference paper supplement (https://openreview.net/forum?id=FrtkfqD4bCc-)
Supplement: supplementary_material [file attachment]

|        |                    |      |    |     |             |              |         |         |
|--------|--------------------|------|----|-----|-------------|--------------|---------|---------|
| tuning | ObjectDetection_12 | 0.1  | 5  | 59  | 9.5551E-102 | 5841.010658  | 274.37  | 3626.82 |
| tuning | ObjectDetection_12 | 0.5  | 5  | 59  | 4.7776E-101 | 5841.010658  | 274.57  | 3626.75 |
| tuning | ObjectDetection_12 | 0.01 | 5  | 59  | 9.5551E-103 | 5841.010658  | 274.93  | 3626.63 |
| tuning | ObjectDetection_13 | 0.5  | 5  | 59  | 4.7776E-101 | 7607.638173  | 2222.83 | 3692.7  |
| tuning | ObjectDetection_13 | 1    | 5  | 59  | 9.5551E-101 | 7607.638173  | 2227.25 | 3692.47 |
| tuning | ObjectDetection_13 | 0.1  | 5  | 59  | 9.5551E-102 | 7607.638173  | 2245.03 | 3692.24 |
| tuning | ObjectDetection_13 | 0.01 | 5  | 59  | 9.5551E-103 | 7607.638173  | 2248.81 | 3692.44 |
| tuning | ObjectDetection_14 | 0.01 | 6  | 59  | 9.5152E-103 | 8220.330149  | 26.92   | 3626.91 |
| tuning | ObjectDetection_14 | 0.1  | 6  | 59  | 9.5152E-102 | 8220.330149  | 27.06   | 3627.05 |
| tuning | ObjectDetection_14 | 0.5  | 6  | 59  | 4.7576E-101 | 8220.330149  | 27.06   | 3627.05 |
| tuning | ObjectDetection_14 | 1    | 6  | 59  | 9.5152E-101 | 8220.330149  | 27.13   | 3627.12 |
| tuning | ObjectDetection_15 | 0.01 | 5  | 59  | 9.5152E-103 | 10125.31617  | 421.5   | 3626.53 |
| tuning | ObjectDetection_15 | 1    | 5  | 59  | 9.5152E-101 | 10125.31617  | 422.42  | 3626.35 |
| tuning | ObjectDetection_15 | 0.5  | 5  | 59  | 4.7576E-101 | 10125.31617  | 423.76  | 3626.41 |
| tuning | ObjectDetection_15 | 0.1  | 5  | 59  | 9.5152E-102 | 10125.31617  | 432.58  | 3626.88 |
| tuning | ObjectDetection_16 | 0.01 | 5  | 59  | 9.5152E-103 | 12197.63622  | 91.82   | 3691.81 |
| tuning | ObjectDetection_16 | 0.1  | 5  | 59  | 9.5152E-102 | 12197.63622  | 92.67   | 3692.66 |
| tuning | ObjectDetection_16 | 1    | 5  | 59  | 9.5152E-101 | 12197.63622  | 92.74   | 3692.73 |
| tuning | ObjectDetection_16 | 0.5  | 5  | 59  | 4.7576E-101 | 12197.63622  | 93.07   | 3693.06 |
| tuning | ObjectDetection_17 | 1    | 6  | 59  | 9.5181E-101 | 2697.435518  | 932.83  | 3627    |
| tuning | ObjectDetection_17 | 0.5  | 6  | 59  | 4.759E-101  | 2697.435518  | 936.08  | 3626.95 |
| tuning | ObjectDetection_17 | 0.1  | 6  | 59  | 9.5181E-102 | 2697.435518  | 939.49  | 3627.15 |
| tuning | ObjectDetection_17 | 0.01 | 6  | 59  | 9.5181E-103 | 2697.435518  | 945.86  | 3627.06 |
| tuning | ObjectDetection_18 | 0.01 | 5  | 59  | 9.5181E-103 | 7250.523062  | 3535.69 | 3626.61 |
| tuning | ObjectDetection_18 | 0.5  | 5  | 59  | 4.759E-101  | 7250.523062  | 3539.03 | 3626.6  |
| tuning | ObjectDetection_18 | 0.1  | 5  | 59  | 9.5181E-102 | 7250.523062  | 3559.75 | 3626.57 |
| tuning | ObjectDetection_18 | 1    | 5  | 59  | 9.5181E-101 | 7250.523062  | 3569.09 | 3626.76 |
| tuning | Promedas_11        | 0.01 | 21 | 132 | 0.0003      | -23.38414909 | 3403.49 | 3614.92 |
| tuning | Promedas_11        | 0.1  | 21 | 132 | 0.003       | -24.91494833 | 15.39   | 17.15   |
| tuning | Promedas_11        | 1    | 21 | 132 | 0.03        | -30.52322606 | 15.03   | 15.04   |
| tuning | Promedas_11        | 0.5  | 21 | 132 | 0.015       | -30.52322606 | 15.18   | 15.18   |
| tuning | Promedas_12        | 0.01 | 22 | 95  | 0.0003      | -17.35243323 | 3459.98 | 3614.24 |
| tuning | Promedas_12        | 0.1  | 22 | 95  | 0.003       | -20.18198928 | 14.59   | 17.61   |
| tuning | Promedas_12        | 1    | 22 | 95  | 0.03        | -22.89439747 | 14.27   | 14.27   |
| tuning | Promedas_12        | 0.5  | 22 | 95  | 0.015       | -22.89439747 | 14.28   | 14.28   |
| tuning | Promedas_13        | 0.5  | 21 | 154 | 0.0001      | -40.68568428 | 660.24  | 3614.99 |
| tuning | Promedas_13        | 0.1  | 21 | 154 | 0.00002     | -40.68568428 | 1872.69 | 3614.93 |
| tuning | Promedas_13        | 0.01 | 21 | 154 | 0.000002    | -40.68568428 | 2625.77 | 3614.98 |
| tuning | Promedas_13        | 1    | 21 | 154 | 0.0002      | -40.80075445 | 29.13   | 3615.03 |
| tuning | Promedas_14        | 1    | 22 | 112 | 0.0002      | -20.20948647 | 309.94  | 3612.99 |
| tuning | Promedas_14        | 0.5  | 22 | 112 | 0.0001      | -20.20948647 | 3194.91 | 3613.08 |
| tuning | Promedas_14        | 0.1  | 22 | 112 | 0.00002     | -22.43570002 | 2645.08 | 3612.98 |
| tuning | Promedas_14        | 0.01 | 22 | 112 | 0.000002    | -22.43570002 | 3400.51 | 3613.04 |
| tuning | Promedas_15        | 1    | 21 | 134 | 0.00005     | -31.37525653 | 48.05   | 3615.28 |
| tuning | Promedas_15        | 0.5  | 21 | 134 | 0.000025    | -31.37525653 | 49.81   | 3615.27 |
| tuning | Promedas_15        | 0.1  | 21 | 134 | 0.000005    | -31.37525653 | 58.58   | 3615.3  |
| tuning | Promedas_15        | 0.01 | 21 | 134 | 0.0000005   | -31.37525653 | 78.44   | 3615.32 |
| tuning | Promedas_16        | 0.01 | 22 | 95  | 0.0003      | -23.93581158 | 3593.08 | 3616.3  |
| tuning | Promedas_16        | 0.1  | 22 | 95  | 0.003       | -28.47893065 | 16.46   | 16.91   |
| tuning | Promedas_16        | 1    | 22 | 95  | 0.03        | -30.51463061 | 16.21   | 16.21   |
| tuning | Promedas_16        | 0.5  | 22 | 95  | 0.015       | -30.51463061 | 16.22   | 16.22   |
| tuning | Promedas_17        | 1    | 22 | 87  | 0.0002      | -22.0741999  | 2881.79 | 3610.85 |
| tuning | Promedas_17        | 0.5  | 22 | 87  | 0.0001      | -22.86936891 | 3540.27 | 3610.89 |
| tuning | Promedas_17        | 0.1  | 22 | 87  | 0.00002     | -23.51952408 | 3364.81 | 3610.91 |
