# Supplementary material
Source: ML conference proceedings conference paper supplement (https://openreview.net/forum?id=FrtkfqD4bCc-)
Supplement: supplementary_material [file attachment]

| problem | thrshld | DH? | IB | Time   | Solution | Wild Type K* | BBK* Solution | BBK* Time |
|---------|---------|-----|----|--------|----------|--------------|---------------|-----------|
| 00021   | 0.00001 | no  | 4  | 3764.9 | 11.92    | 9.368236     | 11.72         | 625.4     |
| 00021   | 0.00001 | yes | 3  | 2167.6 | 11.92    | 9.368236     | 11.72         | 625.4     |
| 00021   | 0.01    | no  | 4  | 2404.2 | 11.92    | 9.368236     | 11.72         | 625.4     |
| 00021   | 0.01    | yes | 3  | 1917.7 | 11.92    | 9.368236     | 11.72         | 625.4     |
| 00021   | 0.1     | no  | 4  | 1677.0 | 11.59    | 9.368236     | 11.72         | 625.4     |
| 00021   | 0.1     | yes | 3  | 2714.0 | 11.59    | 9.368236     | 11.72         | 625.4     |
| 00025   | 0.00001 | no  | 4  | 200.8  | 13.65    | 10.74203     | 13.65         | 1013.2    |
| 00025   | 0.00001 | yes | 3  | 287.4  | 16.18    | 10.74203     | 13.65         | 1013.2    |
| 00025   | 0.01    | no  | 4  | 185.3  | 13.65    | 10.74203     | 13.65         | 1013.2    |
| 00025   | 0.01    | yes | 3  | 114.6  | 13.65    | 10.74203     | 13.65         | 1013.2    |
| 00025   | 0.1     | no  | 4  | 171.3  | 13.65    | 10.74203     | 13.65         | 1013.2    |
| 00025   | 0.1     | yes | 3  | 49.7   | 13.65    | 10.74203     | 13.65         | 1013.2    |
| 00007   | 0.00001 | no  | 3  | 3611.3 | 15.13    | 14.082539    | 14.73         | 399.6     |
| 00007   | 0.00001 | yes | 3  | 1962.3 | 15.17    | 14.082539    | 14.73         | 399.6     |
| 00007   | 0.01    | no  | 3  | 3611.4 | 14.73    | 14.082539    | 14.73         | 399.6     |
| 00007   | 0.01    | yes | 3  | 1627.6 | 15.17    | 14.082539    | 14.73         | 399.6     |
| 00007   | 0.1     | no  | 3  | 3611.4 | 14.73    | 14.082539    | 14.73         | 399.6     |
| 00007   | 0.1     | yes | 3  | 1357.9 | 15.17    | 14.082539    | 14.73         | 399.6     |
| 00013   | 0.00001 | no  | 4  | 222.7  | 15.03    | 13.252182    | 15.03         | 43.8      |
| 00013   | 0.00001 | yes | 3  | 73.9   | 15.03    | 13.252182    | 15.03         | 43.8      |
| 00013   | 0.01    | no  | 4  | 221.8  | 15.03    | 13.252182    | 15.03         | 43.8      |
| 00013   | 0.01    | yes | 3  | 73.8   | 15.03    | 13.252182    | 15.03         | 43.8      |
| 00013   | 0.1     | no  | 4  | 206.9  | 15.03    | 13.252182    | 15.03         | 43.8      |
| 00013   | 0.1     | yes | 3  | 73.8   | 15.03    | 13.252182    | 15.03         | 43.8      |
| 00017   | 0.00001 | no  | 4  | 3747.1 | 10.86    | 10.52291     | 10.8          | 91.2      |
| 00017   | 0.00001 | yes | 3  | 3611.9 | 10.86    | 10.52291     | 10.8          | 91.2      |
| 00017   | 0.01    | no  | 4  | 3503.5 | 10.88    | 10.52291     | 10.8          | 91.2      |
| 00017   | 0.01    | yes | 3  | 2691.0 | 10.88    | 10.52291     | 10.8          | 91.2      |
| 00017   | 0.1     | no  | 4  | 2697.1 | 10.86    | 10.52291     | 10.8          | 91.2      |
| 00017   | 0.1     | yes | 3  | 3611.6 | 10.86    | 10.52291     | 10.8          | 91.2      |
| 00030   | 0.00001 | no  | 3  | 1748.4 | 11.12    | 10.3472      | 10.97         | 248.3     |
| 00030   | 0.00001 | yes | 3  | 1892.9 | 11.12    | 10.3472      | 10.97         | 248.3     |
| 00030   | 0.01    | no  | 3  | 1434.0 | 11.12    | 10.3472      | 10.97         | 248.3     |
| 00030   | 0.01    | yes | 3  | 1485.3 | 11.12    | 10.3472      | 10.97         | 248.3     |
| 00030   | 0.1     | no  | 3  | 1195.7 | 11.12    | 10.3472      | 10.97         | 248.3     |
| 00030   | 0.1     | yes | 3  | 1278.5 | 11.12    | 10.3472      | 10.97         | 248.3     |
