# Supplementary material
Source: ML conference proceedings conference paper supplement (https://openreview.net/forum?id=FrtkfqD4bCc-)
Supplement: supplementary_material [file attachment]

|                        | PROBLEM STATISTICS |      |    |  | AOBB-UFO |        |          | UAI 2022 COMPETITION COMPETING SOLVERS |           |         |         |          |         |         |         |
|------------------------|--------------------|------|----|--|----------|--------|----------|----------------------------------------|-----------|---------|---------|----------|---------|---------|---------|
|                        | X  ;  F            | w*   | k  |  | Anytime  | Time   | Solution | braobb                                 | daoopt-lh | daoopt  | lbp     | toulbar2 |         |         |         |
| Problem                |                    |      |    |  |          |        |          |                                        |           |         |         | ipr      | vacint  | vns     | uai14   |
| 75-17-5.Q0.5.I4        | 289 ; 289          | 110  | 2  |  | 18.1     | 18.06  | -7.7     | -7.5                                   | -7.7      | -7.7    |         | -7.7     | -7.7    | -7.7    | -14.1   |
| 75-19-5.Q0.5.I2        | 361 ; 361          | 133  | 2  |  | 15.7     | 15.66  | -10.1    | -9.7                                   | -9.6      | -9.6    |         | -9.6     | -9.6    | -9.6    | -15.9   |
| 75-22-5.Q0.5.I2        | 484 ; 484          | 110  | 2  |  | 37.6     | 37.59  | -12.8    |                                        | -11.8     | -11.7   |         | -11.7    | -11.7   | -11.7   |         |
| 75-23-5.Q0.5.I3        | 529 ; 529          | 177  | 2  |  | 17.9     | 17.95  | -13.7    | -13.8                                  | -12.5     | -12.5   |         | -12.5    | -12.5   | -12.5   |         |
| 75-26-5.Q0.5.I4        | 676 ; 676          | 208  | 2  |  | 31.5     | 31.46  | -19      | -18.3                                  | -18.1     | -18.1   |         | -18.1    | -18.1   | -18.1   |         |
| 90-22-5.Q0.5.I4        | 484 ; 484          | 173  | 2  |  | 39.4     | 39.39  | -6.4     | -5.6                                   | -5.6      | -5.6    |         | -5.6     | -5.6    | -5.6    |         |
| 90-24-5.Q0.5.I2        | 576 ; 576          | 131  | 2  |  | 27.4     | 27.37  | -5.8     | -5.6                                   | -5.7      | -5.7    |         | -5.7     | -5.7    | -5.7    |         |
| 90-25-5.Q0.5.I2        | 625 ; 625          | 174  | 2  |  | 21.4     | 21.44  | -7.9     |                                        | -7.8      | -7.7    |         | -7.7     | -7.7    | -7.7    |         |
| 90-26-5.Q0.5.I1        | 676 ; 676          | 110  | 2  |  | 27       | 26.96  | -8.8     |                                        | -9.1      | -8.7    |         | -8.7     | -8.7    | -8.7    |         |
| 90-30-5.Q0.5.I1        | 900 ; 900          | 246  | 2  |  | 36.1     | 36.14  | -11      | -11.5                                  | -10.9     | -10.9   |         | -10.9    | -10.9   | -10.9   |         |
| 90-34-5.Q0.5.I2        | 1156 ; 1156        | 352  | 2  |  | 29.6     | 29.63  | -12.7    |                                        | -14.2     | -12.2   |         | -12.2    | -12.2   | -12.2   |         |
| 90-38-5.Q0.5.I4        | 1444 ; 1444        | 371  | 2  |  | 44.9     | 44.86  | -17.1    |                                        |           | -16.8   |         | -16.8    | -16.8   | -16.8   |         |
| 90-42-5.Q0.5.I4        | 1764 ; 1764        | 300  | 2  |  | 40.6     | 40.59  | -17.3    |                                        |           | -17     |         | -17      | -17     | -17     |         |
| 90-46-5.Q0.5.I4        | 2116 ; 2116        | 356  | 2  |  | 46       | 45.95  | -26      |                                        |           | -24.8   |         | -24.9    | -24.9   | -24.5   |         |
| 90-50-5.Q0.5.I3        | 2500 ; 2500        | 788  | 2  |  | 201.2    | 201.21 | -26.3    | -36.9                                  |           | -26.8   |         | -25.7    | -25.7   | -25.7   |         |
| bw_p24_16              | 937 ; 937          | 136  | 3  |  | 82.8     | 3682.8 |          |                                        |           |         |         |          |         |         |         |
| bw_p24_20              | 1169 ; 1169        | 171  | 3  |  | 105.2    | 3705.2 |          |                                        |           |         |         |          |         |         |         |
| bw_p34_15              | 2191 ; 2191        | 294  | 3  |  | 59.2     | 3659.2 |          |                                        |           |         |         |          |         |         |         |
| bw_p34_20              | 2916 ; 2916        | 389  | 3  |  | 108.5    | 3708.5 |          |                                        |           |         |         |          |         |         |         |
| bw_p44_15              | 4075 ; 4075        | 638  | 3  |  | 514.1    | 4114.1 |          |                                        |           |         |         |          |         |         |         |
| bw_p44_19              | 5155 ; 5155        | 722  | 3  |  | 828.9    | 4428.9 |          |                                        |           |         |         |          |         |         |         |
| bw_p54_10              | 4366 ; 4366        | 777  | 3  |  | 911.2    | 911.25 | -1       |                                        |           |         |         |          |         |         |         |
| bw_p54_16              | 6964 ; 6964        | 1134 | 3  |  |          |        |          |                                        |           |         |         |          |         |         |         |
| comm_p01_16            | 4477 ; 4477        | 831  | 2  |  | 266.9    | 3866.9 |          |                                        |           |         |         |          |         |         |         |
| comm_p01_20            | 5585 ; 5585        | 1039 | 2  |  | 453.8    | 4053.8 |          |                                        |           |         |         |          |         |         |         |
| Grids_20               | 6400 ; 19040       | 122  | 2  |  | 63.8     | 3663.8 |          | 4518.7                                 | 4833.9    | 4839    | 4804.9  | 4837.5   | 4816.7  | 4836.5  |         |
| Grids_21               | 1600 ; 4800        | 108  | 2  |  | 50.9     | 3650.9 |          | 8002.4                                 | 8429.3    | 8499.7  | 8322.9  | 8499.7   | 8357.8  | 8438.1  | 8222.4  |
| Grids_22               | 1600 ; 4800        | 97   | 2  |  | 53.1     | 3653.1 |          | 2687.2                                 | 2833.8    | 2835.2  | 2763.4  | 2835.2   | 2797.1  | 2823.4  | 2790.8  |
| Grids_23               | 1600 ; 4720        | 73   | 2  |  | 40       | 3640   |          | 2787.3                                 | 2793.4    | 2793    | 2739.2  | 2793     | 2778.7  | 2780.3  | 2765    |
| Grids_24               | 1600 ; 4720        | 61   | 2  |  | 40.9     | 3640.9 |          | 8204.5                                 | 8234.4    | 8237.3  | 8106.5  | 8237.3   | 8160.9  | 8175.2  | 8023.4  |
| Grids_25               | 1600 ; 4720        | 63   | 2  |  | 71.2     | 3671.2 |          | 1209.9                                 | 1208.9    | 1209.3  | 1204.6  | 1209.3   | 1199.5  | 1209.1  | 1209    |
| Grids_26               | 400 ; 1200         | 59   | 2  |  | 58.7     | 3658.7 |          | 1322.2                                 | 1326.3    | 1326.3  | 1300.4  | 1326.3   | 1321.4  | 1322.2  | 1280.9  |
| Grids_27               | 1600 ; 4720        | 69   | 2  |  | 38.5     | 3638.5 |          | 5507                                   | 5506.8    | 5508.9  | 5383.1  | 5508.9   | 5422.5  | 5489.7  | 5378.4  |
| Grids_28               | 400 ; 1200         | 53   | 2  |  | 90       | 3690   |          | 1969.1                                 | 1982.5    | 1982.5  | 1924.7  | 1982.5   | 1978.2  | 1972.6  | 1948.2  |
| Grids_29               | 400 ; 1200         | 54   | 2  |  | 83.6     | 3683.6 |          | 669.2                                  | 673       | 673     | 662.6   | 673      | 672.3   | 670.4   | 666.3   |
| ImageAlignment_11      | 350 ; 3563         | 33   | 77 |  | 25.5     | 108.67 | -1005.8  | -824.2                                 | -824.2    | -824.2  | -824.2  | -824.2   | -824.2  | -824.2  | -824.2  |
| ImageAlignment_12      | 30 ; 465           | 29   | 58 |  | 5.3      | 5.28   | -436.7   | -436.7                                 | -436.7    | -436.7  | -436.7  | -436.7   | -436.7  | -436.7  | -436.7  |
| ImageAlignment_13      | 400 ; 3334         | 21   | 83 |  | 78       | 128.24 | -3081.4  | -2998.9                                | -2999.8   | -2999.8 | -2998.9 | -2999.8  | -2999.8 | -2999.8 | -2998.9 |
| ImageAlignment_14      | 200 ; 2128         | 23   | 69 |  | 9.1      | 12.89  | -1632    | -1557.5                                | -1557.5   | -1557.5 | -1557.5 | -1557.5  | -1557.5 | -1557.5 | -1557.5 |
| ImageAlignment_15      | 300 ; 2732         | 23   | 68 |  | 59.7     | 415.05 | -1339.5  | -1177.5                                | -1177.5   | -1177.5 | -1177.5 | -1177.5  | -1177.5 | -1177.5 |         |
| ObjectDetection_13     | 60 ; 1830          | 59   | 21 |  | 6.2      | 3606.1 | -528.6   | 6684.3                                 | 9967.7    | 9854.2  | 8826.5  | 9970.6   | 9970.6  | 9970.6  | 8883.1  |
| ObjectDetection_14     | 60 ; 1830          | 59   | 11 |  | 31.6     | 3631.1 | 236.6    | 6712.5                                 | 9020.8    | 9020.8  | 8341.9  | 9093.7   | 9093.7  | 9093.7  | 8562.9  |
| ObjectDetection_15     | 60 ; 1830          | 59   | 16 |  | 2155.8   | 3637   | -404     | 10628                                  | 11703.8   | 12479   | 11544   | 12633    | 12633   | 12633   | 11976   |
| ObjectDetection_16     | 60 ; 1830          | 59   | 21 |  | 1753.5   | 3606.2 | -471     | 12023                                  | 14154.2   | 13536   | 13548   | 14347    | 14347   | 14347   | 14022   |
| ObjectDetection_17     | 60 ; 1830          | 59   | 11 |  | 30.6     | 3630.5 | -335.9   | 2454.9                                 | 4716.4    | 4816    | 3794.9  | 4887.4   | 4887.4  | 4887.4  | 4518.2  |
| or_chain_11.fg.Q0.5.I3 | 900 ; 915          | 191  | 2  |  | 30.8     | 30.85  | -22.9    |                                        |           |         |         |          |         |         |         |
| or_chain_16.fg.Q0.5.I3 | 1675 ; 1700        | 318  | 2  |  | 98.5     | 98.52  | -38.1    | -53.8                                  | -25.2     | -23.4   |         | -23.4    | -23.4   | -23.4   |         |
| or_chain_22.fg.Q0.5.I3 | 1044 ; 1054        | 196  | 2  |  | 28.9     | 28.92  | -15.3    |                                        |           |         |         |          |         |         |         |
| or_chain_24.fg.Q0.5.I3 | 1155 ; 1171        | 247  | 2  |  | 32.3     | 32.31  | -24.4    |                                        |           |         |         |          |         |         |         |
| or_chain_25.fg.Q0.5.I3 | 1075 ; 1086        | 88   | 2  |  | 30.4     | 30.37  | -16.8    |                                        |           |         |         |          |         |         |         |
| or_chain_32.fg.Q0.5.I3 | 1466 ; 1478        | 108  | 2  |  | 32       | 3632   |          |                                        |           |         |         |          |         |         |         |
| or_chain_36.fg.Q0.5.I3 | 933 ; 943          | 91   | 2  |  | 30.5     | 30.46  | -15.3    |                                        |           |         |         |          |         |         |         |
| or_chain_39.fg.Q0.5.I3 | 1751 ; 1766        | 430  | 2  |  | 96.3     | 96.32  | -22.9    |                                        |           |         |         |          |         |         |         |
| or_chain_40.fg.Q0.5.I3 | 988 ; 998          |      |    |  |          |        |          |                                        |           |         |         |          |         |         |         |
