# Supplementary material
Source: ML conference proceedings conference paper supplement (https://openreview.net/forum?id=FrtkfqD4bCc-)
Supplement: supplementary_material [file attachment]

| Benchmark  | Problem ID              | Algorithm   | iB | Solution*    | Anytime        | Time    | WT K* | BBK* Soln    | BBK* Time |
|------------|-------------------------|-------------|----|--------------|----------------|---------|-------|--------------|-----------|
| Expanded_5 | 00007_1_0_7_5-0-1-2-3-5 | AOBB-K*-UFO | 3  | <b>15.17</b> | 1582.65        | timeout | 14.08 | <b>14.73</b> | 401.09    |
| Expanded_5 | 00007_1_0_7_5-0-1-2-3-5 | AOBB-K*     | 3  | 14.73        | 62.78          | timeout | 14.08 | 14.73        | 401.09    |
| Expanded_5 | 00007_1_0_7_5-0-1-3-4-5 | AOBB-K*-UFO | 3  | <b>14.84</b> | 1293.45        | timeout | 14.08 | <b>14.73</b> | 404.03    |
| Expanded_5 | 00007_1_0_7_5-0-1-3-4-5 | AOBB-K*     | 3  | 14.73        | 344.99         | timeout | 14.08 | 14.73        | 404.03    |
| Expanded_5 | 00007_1_0_7_5-0-1-3-5-6 | AOBB-K*-UFO | 3  | <b>14.84</b> | 893.49         | timeout | 14.08 | <b>15.60</b> | 205.56    |
| Expanded_5 | 00007_1_0_7_5-0-1-3-5-6 | AOBB-K*     | 3  | <b>14.73</b> | 66.67          | timeout | 14.08 | <b>15.60</b> | 205.56    |
| Expanded_5 | 00007_1_0_7_5-0-1-4-5-6 | AOBB-K*-UFO | 3  | <b>14.73</b> | <b>26.74</b>   | timeout | 14.08 | <b>15.60</b> | 201.04    |
| Expanded_5 | 00007_1_0_7_5-0-1-4-5-6 | AOBB-K*     | 3  | <b>14.73</b> | 69.39          | timeout | 14.08 | <b>15.60</b> | 201.04    |
| Expanded_5 | 00018_2_0_6_5-0-1-2-3-4 | AOBB-K*-UFO | 3  | <b>16.60</b> | 2999.87        | timeout | 15.79 | <b>16.58</b> | 753.95    |
| Expanded_5 | 00018_2_0_6_5-0-1-2-3-4 | AOBB-K*     | 3  | 16.58        | 61.54          | timeout | 15.79 | 16.58        | 753.95    |
| Expanded_5 | 00018_2_0_6_5-0-1-2-3-5 | AOBB-K*-UFO | 3  | <b>16.60</b> | 1885.96        | timeout | 15.79 | <b>16.58</b> | 628.53    |
| Expanded_5 | 00018_2_0_6_5-0-1-2-3-5 | AOBB-K*     | 3  | 16.58        | 66.24          | timeout | 15.79 | 16.58        | 628.53    |
| Expanded_5 | 00018_2_0_6_5-1-2-3-4-5 | AOBB-K*-UFO | 3  | <b>16.24</b> | 3384.50        | timeout | 15.79 | 16.25        | 501.48    |
| Expanded_5 | 00018_2_0_6_5-1-2-3-4-5 | AOBB-K*     | 3  | <b>15.79</b> | 30.23          | timeout | 15.79 | 16.25        | 501.48    |
| Expanded_5 | 00027_6_5-0-1-2-3-5_1_0 | AOBB-K*     | 3  | <b>15.48</b> | <b>27.38</b>   | 261.17  | 15.48 | <b>15.55</b> | 1270.65   |
| Expanded_5 | 00027_6_5-0-1-2-3-5_1_0 | AOBB-K*-UFO | 3  | <b>15.48</b> | 29.37          | 263.49  | 15.48 | <b>15.55</b> | 1270.65   |
| Expanded_5 | 00028_1_0_6_5-0-1-2-3-5 | AOBB-K*     | 3  | 15.27        | 44.48          | 127.17  | 15.27 | 15.27        | 98.97     |
| Expanded_5 | 00028_1_0_6_5-0-1-2-3-5 | AOBB-K*-UFO | 3  | 15.27        | 46.79          | 129.13  | 15.27 | 15.27        | 98.97     |
| Expanded_5 | 00028_1_0_6_5-0-2-3-4-5 | AOBB-K*     | 3  | 15.44        | <b>69.44</b>   | 141.16  | 15.27 | 15.44        | 64.50     |
| Expanded_5 | 00028_1_0_6_5-0-2-3-4-5 | AOBB-K*-UFO | 3  | 15.44        | 71.88          | 143.80  | 15.27 | 15.44        | 64.50     |
| Expanded_5 | 00028_1_0_6_5-1-2-3-4-5 | AOBB-K*     | 3  | 15.44        | <b>104.57</b>  | 206.37  | 15.27 | 15.44        | 62.30     |
| Expanded_5 | 00028_1_0_6_5-1-2-3-4-5 | AOBB-K*-UFO | 3  | 15.44        | 106.11         | 207.28  | 15.27 | 15.44        | 62.30     |
| Expanded_5 | 00031_2_0_5_5-0-1-2-3-4 | AOBB-K*-UFO | 3  | 7.88         | <b>22.31</b>   | 36.64   | 7.63  | 7.88         | 130.04    |
| Expanded_5 | 00031_2_0_5_5-0-1-2-3-4 | AOBB-K*     | 3  | 7.88         | 129.36         | 2082.35 | 7.63  | 7.88         | 130.04    |
| Expanded_5 | 00044_5_5-0-1-2-3-4_2_0 | AOBB-K*     | 3  | 18.19        | <b>33.76</b>   | timeout | 18.19 | 18.19        | 70.22     |
| Expanded_5 | 00044_5_5-0-1-2-3-4_2_0 | AOBB-K*-UFO | 3  | 18.19        | 35.49          | timeout | 18.19 | 18.19        | 70.22     |
| Expanded_5 | 00047_2_0_6_5-0-1-2-3-4 | AOBB-K*-UFO | 3  | <b>23.08</b> | <b>2081.84</b> | timeout | 22.70 | 23.05        | 6984.35   |
| Expanded_5 | 00047_2_0_6_5-0-1-2-3-4 | AOBB-K*     | 3  | <b>22.74</b> | 224.38         | timeout | 22.70 | 23.05        | 6984.35   |
| Expanded_5 | 00047_2_0_6_5-0-1-2-3-5 | AOBB-K*-UFO | 3  | <b>22.77</b> | 2652.32        | timeout | 22.70 | <b>23.05</b> | 1696.25   |
| Expanded_5 | 00047_2_0_6_5-0-1-2-3-5 | AOBB-K*     | 3  | <b>22.74</b> | 215.21         | timeout | 22.70 | <b>23.05</b> | 1696.25   |
| Expanded_5 | 00047_2_0_6_5-0-1-2-4-5 | AOBB-K*-UFO | 3  | <b>22.74</b> | <b>27.73</b>   | 407.34  | 22.70 | <b>22.83</b> | 1374.29   |
| Expanded_5 | 00047_2_0_6_5-0-1-2-4-5 | AOBB-K*     | 3  | <b>22.74</b> | 215.99         | timeout | 22.70 | <b>22.83</b> | 1374.29   |
