# Supplementary material
Source: ML conference proceedings conference paper supplement (https://openreview.net/forum?id=FrtkfqD4bCc-)
Supplement: supplementary_material [file attachment]

|        |                |      |    |     |             |              |         |         |
|--------|----------------|------|----|-----|-------------|--------------|---------|---------|
| tuning | wcsp_13        | 0.5  | 7  | 42  | 0.442463    | -0.212370587 | 26      | 26      |
| tuning | wcsp_13        | 0.1  | 7  | 42  | 0.0884927   | -0.212370587 | 26.04   | 26.04   |
| tuning | wcsp_13        | 1    | 7  | 42  | 0.884927    | -0.212370587 | 26.08   | 26.09   |
| tuning | wcsp_13        | 0.01 | 7  | 42  | 0.00884927  | -0.212370587 | 26.58   | 26.58   |
| tuning | wcsp_14        | 0.5  | 8  | 45  | 0.480748    | -0.137105438 | 55.54   | 1106.31 |
| tuning | wcsp_14        | 0.01 | 8  | 45  | 0.00961495  | -0.137105438 | 55.6    | 1102.32 |
| tuning | wcsp_14        | 0.1  | 8  | 45  | 0.0961495   | -0.137105438 | 55.66   | 1111.92 |
| tuning | wcsp_14        | 1    | 8  | 45  | 0.961495    | -0.160979519 | 73.18   | 213.65  |
| tuning | wcsp_15        | 1    | 10 | 65  | 0.0001      | -192         | 3600.94 | 3609.43 |
| tuning | wcsp_15        | 0.5  | 10 | 65  | 0.00005     | -192         | 3602.23 | 3609.52 |
| tuning | wcsp_15        | 0.01 | 10 | 65  | 0.000001    | -196         | 556.12  | 3609.53 |
| tuning | wcsp_15        | 0.1  | 10 | 65  | 0.00001     | -196         | 560.5   | 3609.38 |
| tuning | wcsp_18        | 0.1  | 5  | 32  | 0.0965032   | -0.082509686 | 61.73   | 62.03   |
| tuning | wcsp_18        | 1    | 5  | 32  | 0.965032    | -0.082509686 | 61.94   | 61.96   |
| tuning | wcsp_18        | 0.5  | 5  | 32  | 0.482516    | -0.082509686 | 62.05   | 62.35   |
| tuning | wcsp_18        | 0.01 | 5  | 32  | 0.00965032  | -0.082509686 | 62.76   | 63.05   |
| final  | 1CKK           | 1    | 3  | 37  | 1.67865E-21 | 4902.602681  | 33.77   | 3633.44 |
| final  | 1CM1           | 0.1  | 3  | 36  | 3.06907E-09 | 4910.973703  | 30.87   | 3630.36 |
| final  | 1CM1           | 0.01 | 3  | 36  | 3.06907E-10 | 4910.973703  | 30.95   | 3630.44 |
| final  | 1CM1           | 1    | 3  | 36  | 3.06907E-08 | 4910.973703  | 31.11   | 3630.59 |
| final  | 1CM1           | 0.5  | 3  | 36  | 1.53453E-08 | 4910.973703  | 31.19   | 3630.68 |
| final  | 1SY9           | 0.1  | 3  | 32  | 4.24526E-08 | 3326.652195  | 191.74  | 3635.15 |
| final  | 1SY9           | 0.5  | 3  | 32  | 2.12263E-07 | 3326.652195  | 193.04  | 3635.04 |
| final  | 1SY9           | 1    | 3  | 32  | 4.24527E-07 | 3326.652195  | 193.35  | 3635.2  |
| final  | 2BBN           | 0.01 | 3  | 36  | 9.38761E-10 | 4901.995268  | 73.26   | 3672.49 |
| final  | 2BBN           | 0.5  | 3  | 36  | 4.69381E-08 | 4901.995268  | 73.34   | 3672.57 |
| final  | 2BBN           | 1    | 3  | 36  | 9.38761E-08 | 4901.995268  | 74      | 3673.22 |
| final  | 2BBN           | 0.1  | 3  | 36  | 9.38761E-09 | 4901.995268  | 74.04   | 3673.25 |
| final  | 2BCX           | 0.5  | 3  | 38  | 1.43022E-09 | 5313.357069  | 59.92   | 3654.53 |
| final  | 2BCX           | 0.01 | 3  | 38  | 2.86045E-11 | 5313.357069  | 60.12   | 3654.69 |
| final  | 2BCX           | 1    | 3  | 38  | 2.86045E-09 | 5313.357069  | 60.36   | 3654.96 |
| final  | 2BCX           | 0.1  | 3  | 38  | 2.86045E-10 | 5313.357069  | 60.57   | 3655.12 |
| final  | BN-d-200-5-10  | 0.01 | 9  | 61  | 0.00256043  | -47.24057718 | 3437.45 | 3613.6  |
| final  | BN-d-200-5-10  | 0.5  | 9  | 61  | 0.128022    | -47.40776084 | 135.86  | 3613.18 |
| final  | BN-d-200-5-10  | 0.1  | 9  | 61  | 0.0256043   | -47.56267385 | 1718.83 | 3613.59 |
| final  | BN-d-200-5-10  | 1    | 9  | 61  | 0.256043    | -47.84065641 | 66.45   | 1094.43 |
| final  | BN-d-250-5-10  | 1    | 9  | 77  | 0.226563    | -58.12543128 | 70.2    | 3616.83 |
| final  | BN-d-250-5-10  | 0.5  | 9  | 77  | 0.113282    | -59.95342514 | 2246.72 | 3617.39 |
| final  | BN-d-250-5-10  | 0.01 | 9  | 77  | 0.00226563  | -60.07886654 | 265.75  | 3617.17 |
| final  | BN-d-250-5-10  | 0.1  | 9  | 77  | 0.0226563   | -60.07886654 | 305.52  | 3617.19 |
| final  | BN-d-500-5-10  | 0.01 | 8  | 160 | 0.00125001  | -121.1339466 | 290.66  | 3621.39 |
| final  | BN-d-500-5-10  | 0.1  | 8  | 160 | 0.0125001   | -121.1339466 | 329.39  | 3621.42 |
| final  | BN-d-500-5-10  | 1    | 8  | 160 | 0.125001    | -122.3365817 | 80.52   | 3621.43 |
| final  | BN-d-500-5-10  | 0.5  | 8  | 160 | 0.0625004   | -124.4527824 | 2268.88 | 3621.3  |
| final  | BN-nd-200-5-10 | 0.01 | 9  | 61  | 0.00235838  | -55.49302781 | 3408.59 | 3614.11 |
| final  | BN-nd-200-5-10 | 1    | 9  | 61  | 0.235838    | -55.76564809 | 366.4   | 1438.84 |
| final  | BN-nd-200-5-10 | 0.1  | 9  | 61  | 0.0235838   | -56.05654127 | 15.53   | 3614.09 |
| final  | BN-nd-200-5-10 | 0.5  | 9  | 61  | 0.117919    | -56.84646826 | 3550.67 | 3614.04 |
| final  | BN-nd-250-5-10 | 0.5  | 9  | 73  | 0.0977481   | -68.18302085 | 1270.53 | 3623.46 |
| final  | BN-nd-250-5-10 | 1    | 9  | 73  | 0.195496    | -68.7664098  | 248.8   | 3622.74 |
| final  | BN-nd-250-5-10 | 0.01 | 9  | 73  | 0.00195496  | -68.89038472 | 23.39   | 3623.33 |
| final  | BN-nd-250-5-10 | 0.1  | 9  | 73  | 0.0195496   | -68.89038472 | 23.47   | 3623.41 |
| final  | BN-nd-500-5-10 | 1    | 8  | 155 | 0.124999    | -141.5103132 | 1145.34 | 3620.99 |
| final  | BN-nd-500-5-10 | 0.1  | 8  | 155 | 0.0124999   | -142.4410719 | 22.43   | 3620.93 |
