# Supplementary material
Source: ML conference proceedings conference paper supplement (https://openreview.net/forum?id=FrtkfqD4bCc-)
Supplement: supplementary_material [file attachment]

| Benchmark  | Problem ID    | Algorithm   | iB | Solution*    | Anytime       | Time          | WT K* | BBK* Soln    | BBK* Time |
|------------|---------------|-------------|----|--------------|---------------|---------------|-------|--------------|-----------|
| Expanded_3 | 00007_1_0_7_3 | AOBB-K*-UFO | 3  | 14.73        | <b>8.30</b>   | <b>339.88</b> | 14.08 | 14.73        | 369.42    |
| Expanded_3 | 00007_1_0_7_3 | AOBB-K*-DH  | 3  | 14.73        | 10.41         | 2872.62       | 14.08 | 14.73        | 369.42    |
| Expanded_3 | 00007_1_0_7_3 | AOBB-K*     | 4  | 14.73        | 91.18         | <b>269.26</b> | 14.08 | 14.73        | 369.42    |
| Expanded_3 | 00009_2_0_3_3 | AOBB-K*-UFO | 3  | 4.51         | <b>9.85</b>   | 348.30        | 4.09  | 4.51         | 215.82    |
| Expanded_3 | 00009_2_0_3_3 | AOBB-K*-DH  | 3  | 4.51         | 10.44         | <b>33.90</b>  | 4.09  | 4.51         | 215.82    |
| Expanded_3 | 00009_2_0_3_3 | AOBB-K*     | 4  | 4.51         | 78.84         | <b>79.85</b>  | 4.09  | 4.51         | 215.82    |
| Expanded_3 | 00011_2_0_3_3 | AOBB-K*-UFO | 3  | 11.85        | <b>6.44</b>   | <b>23.80</b>  | 11.75 | 11.85        | 26.58     |
| Expanded_3 | 00011_2_0_3_3 | AOBB-K*-DH  | 3  | 11.85        | 7.77          | <b>24.64</b>  | 11.75 | 11.85        | 26.58     |
| Expanded_3 | 00011_2_0_3_3 | AOBB-K*     | 4  | 11.85        | 102.17        | 102.18        | 11.75 | 11.85        | 26.58     |
| Expanded_3 | 00012_3_0_3_3 | AOBB-K*-DH  | 3  | <b>13.93</b> | <b>7.54</b>   | 22.06         | 13.93 | 13.93        | 11.83     |
| Expanded_3 | 00012_3_0_3_3 | AOBB-K*     | 4  | <b>13.93</b> | 69.04         | 69.05         | 13.93 | 13.93        | 11.83     |
| Expanded_3 | 00012_3_0_3_3 | AOBB-K*-UFO | 3  | <b>13.91</b> | 6.08          | 8.20          | 13.93 | 13.93        | 11.83     |
| Expanded_3 | 00013_3_0_4_3 | AOBB-K*-UFO | 3  | 15.03        | <b>6.17</b>   | 90.89         | 13.25 | 15.03        | 39.22     |
| Expanded_3 | 00013_3_0_4_3 | AOBB-K*-DH  | 3  | 15.03        | 10.23         | <b>10.23</b>  | 13.25 | 15.03        | 39.22     |
| Expanded_3 | 00013_3_0_4_3 | AOBB-K*     | 4  | 15.03        | 101.91        | 101.91        | 13.25 | 15.03        | 39.22     |
| Expanded_3 | 00014_3_0_3_3 | AOBB-K*-UFO | 3  | 14.36        | <b>6.12</b>   | <b>8.41</b>   | 13.96 | 14.36        | 44.93     |
| Expanded_3 | 00014_3_0_3_3 | AOBB-K*-DH  | 3  | 14.36        | 8.99          | <b>26.95</b>  | 13.96 | 14.36        | 44.93     |
| Expanded_3 | 00014_3_0_3_3 | AOBB-K*     | 4  | 14.36        | 70.87         | 70.88         | 13.96 | 14.36        | 44.93     |
| Expanded_3 | 00017_2_0_4_3 | AOBB-K*-UFO | 3  | <b>10.86</b> | <b>7.76</b>   | 153.61        | 10.52 | <b>10.80</b> | 78.00     |
| Expanded_3 | 00017_2_0_4_3 | AOBB-K*-DH  | 3  | <b>10.86</b> | <b>15.96</b>  | 41.66         | 10.52 | <b>10.80</b> | 78.00     |
| Expanded_3 | 00017_2_0_4_3 | AOBB-K*     | 4  | <b>10.86</b> | 118.00        | 118.01        | 10.52 | <b>10.80</b> | 78.00     |
| Expanded_3 | 00019_3_0_3_3 | AOBB-K*-UFO | 3  | 14.99        | <b>6.21</b>   | 630.15        | 14.99 | 14.99        | 34.00     |
| Expanded_3 | 00019_3_0_3_3 | AOBB-K*-DH  | 3  | 14.99        | 11.46         | 57.37         | 14.99 | 14.99        | 34.00     |
| Expanded_3 | 00019_3_0_3_3 | AOBB-K*     | 4  | 14.99        | 77.63         | 77.64         | 14.99 | 14.99        | 34.00     |
| Expanded_3 | 00020_3_0_3_3 | AOBB-K*-UFO | 3  | 10.96        | <b>13.91</b>  | <b>488.61</b> | 10.60 | 10.96        | 1388.13   |
| Expanded_3 | 00020_3_0_3_3 | AOBB-K*-DH  | 3  | 10.96        | 39.94         | <b>343.36</b> | 10.60 | 10.96        | 1388.13   |
| Expanded_3 | 00020_3_0_3_3 | AOBB-K*     | 4  | 10.96        | 101.54        | <b>101.54</b> | 10.60 | 10.96        | 1388.13   |
| Expanded_3 | 00021_1_0_4_3 | AOBB-K*-UFO | 3  | <b>11.92</b> | <b>89.68</b>  | 632.84        | 9.37  | <b>11.72</b> | 551.27    |
| Expanded_3 | 00021_1_0_4_3 | AOBB-K*-DH  | 3  | <b>11.92</b> | <b>137.64</b> | 1313.56       | 9.37  | <b>11.72</b> | 551.27    |
| Expanded_3 | 00021_1_0_4_3 | AOBB-K*     | 4  | <b>11.92</b> | <b>197.66</b> | <b>200.40</b> | 9.37  | <b>11.72</b> | 551.27    |
| Expanded_3 | 00025_3_0_4_3 | AOBB-K*-UFO | 3  | <b>16.18</b> | <b>14.33</b>  | <b>66.88</b>  | 10.74 | <b>13.65</b> | 880.46    |
| Expanded_3 | 00025_3_0_4_3 | AOBB-K*-DH  | 3  | <b>16.18</b> | <b>52.35</b>  | <b>81.68</b>  | 10.74 | <b>13.65</b> | 880.46    |
| Expanded_3 | 00025_3_0_4_3 | AOBB-K*     | 4  | <b>16.18</b> | <b>168.59</b> | <b>168.60</b> | 10.74 | <b>13.65</b> | 880.46    |
| Expanded_3 | 00030_4_3_2_0 | AOBB-K*-UFO | 3  | <b>11.12</b> | <b>8.02</b>   | <b>112.97</b> | 10.35 | <b>10.97</b> | 275.38    |
| Expanded_3 | 00030_4_3_2_0 | AOBB-K*-DH  | 3  | <b>11.12</b> | <b>25.39</b>  | <b>54.02</b>  | 10.35 | <b>10.97</b> | 275.38    |
| Expanded_3 | 00030_4_3_2_0 | AOBB-K*     | 4  | <b>11.12</b> | <b>154.24</b> | <b>154.28</b> | 10.35 | <b>10.97</b> | 275.38    |
