# Supplementary material
Source: ML conference proceedings conference paper supplement (https://openreview.net/forum?id=FrtkfqD4bCc-)
Supplement: supplementary_material [file attachment]

|       |                 |      |    |    |            |              |        |         |
|-------|-----------------|------|----|----|------------|--------------|--------|---------|
| final | Segmentation_17 | 0.1  | 5  | 20 | 0.0244133  | -174.933221  | 220.02 | 3630    |
| final | Segmentation_17 | 0.5  | 5  | 20 | 0.122066   | -179.2991144 | 35.49  | 777.25  |
| final | Segmentation_17 | 1    | 5  | 20 | 0.244133   | -186.9708827 | 30.24  | 32.44   |
| final | Segmentation_18 | 0.01 | 21 | 20 | 0.00236981 | -33.98405622 |        | 3.1     |
| final | Segmentation_18 | 0.1  | 21 | 20 | 0.0236981  | -33.98411564 |        | 3.04    |
| final | Segmentation_18 | 0.5  | 21 | 20 | 0.11849    | -35.86757755 |        | 3.14    |
| final | Segmentation_18 | 1    | 21 | 20 | 0.236981   | -45.64502655 |        | 3       |
| final | Segmentation_19 | 0.01 | 21 | 20 | 0.00243372 | -24.07501592 |        | 3.04    |
| final | Segmentation_19 | 0.1  | 21 | 20 | 0.0243372  | -24.07501592 |        | 3.12    |
| final | Segmentation_19 | 0.5  | 21 | 20 | 0.121686   | -24.47331743 |        | 3.18    |
| final | Segmentation_19 | 1    | 21 | 20 | 0.243372   | -33.36002376 |        | 3.24    |
| final | Segmentation_20 | 0.01 | 5  | 21 | 0.00235781 | -112.0022081 | 39     | 3631.66 |
| final | Segmentation_20 | 0.1  | 5  | 21 | 0.0235781  | -115.8986261 | 33.82  | 3631.16 |
| final | Segmentation_20 | 0.5  | 5  | 21 | 0.11789    | -124.5961515 | 31.46  | 1161.44 |
| final | Segmentation_20 | 1    | 5  | 21 | 0.235781   | -143.851647  | 31.16  | 128.36  |
| final | wcsp_14         | 0.01 | 8  | 48 | 0.00961495 | 1.52137732   | 79.5   | 105.8   |
| final | wcsp_14         | 0.1  | 8  | 48 | 0.0961495  | 1.52137732   | 79.68  | 105.99  |
| final | wcsp_14         | 0.5  | 8  | 48 | 0.480748   | 1.52137732   | 79.86  | 106.2   |
| final | wcsp_14         | 1    | 8  | 48 | 0.961495   | 1.497503238  | 67.5   | 74.33   |
| final | wcsp_15         | 0.1  | 10 | 66 | 0.00001    | -162.0165851 | 16.26  | 3610.32 |
| final | wcsp_15         | 0.01 | 10 | 66 | 0.000001   | -162.0165851 | 16.33  | 3610.39 |
| final | wcsp_15         | 0.5  | 10 | 66 | 0.00005    | -162.0165851 | 16.39  | 3610.42 |
| final | wcsp_15         | 1    | 10 | 66 | 0.0001     | -162.0165851 | 16.41  | 3610.49 |
| final | wcsp_18         | 0.5  | 5  | 38 | 0.482516   | 2.22791633   | 84.69  | 84.93   |
| final | wcsp_18         | 0.1  | 5  | 38 | 0.0965032  | 2.22791633   | 84.86  | 85.1    |
| final | wcsp_18         | 0.01 | 5  | 38 | 0.00965032 | 2.22791633   | 86.08  | 86.32   |
| final | wcsp_18         | 1    | 5  | 38 | 0.965032   | 0.2069791    | 81.76  | 81.78   |
