# Supplementary material
Source: ML conference proceedings conference paper supplement (https://openreview.net/forum?id=FrtkfqD4bCc-)
Supplement: supplementary_material [file attachment]

| 3 Mut   | AOBB-K*-b |       |       |       | AOBB-K* |       |       |
|---------|-----------|-------|-------|-------|---------|-------|-------|
| Problem | i         | Soln  | Time  | wt K* | i       | Soln  | Time  |
| 00007   | 4         | 14.73 | 269.3 | 14.08 | -       | -inf  | t/o   |
| 00009   | 4         | 4.51  | 79.9  | 4.09  | 4       | 4.51  | 99.5  |
| 00011   | 4         | 11.85 | 102.2 | 11.75 | 4       | 11.85 | 76.1  |
| 00012   | 4         | 13.93 | 69.1  | 13.93 | 4       | 13.93 | 60.9  |
| 00013   | 4         | 15.03 | 101.9 | 13.25 | 4       | 15.03 | 100.8 |
| 00014   | 4         | 14.36 | 70.9  | 13.96 | 4       | 14.36 | 60.6  |
| 00017   | 4         | 10.86 | 118.0 | 10.52 | 5       | 10.86 | 334.6 |
| 00019   | 4         | 14.99 | 77.6  | 14.99 | 5       | 14.99 | 181.3 |
| 00020   | 4         | 10.96 | 101.5 | 10.60 | 5       | 10.96 | 360.7 |
| 00021   | 4         | 11.92 | 200.4 | 9.37  | 4       | 11.92 | 205.1 |
| 00025   | 4         | 16.18 | 168.6 | 10.74 | 4       | 16.18 | 153.8 |
| 00030   | 4         | 11.12 | 154.3 | 10.35 | 4       | 11.12 | 276.6 |
