# Supplementary material
Source: ML conference proceedings conference paper supplement (https://openreview.net/forum?id=FrtkfqD4bCc-)
Supplement: supplementary_material [file attachment]

|        |                 |      |    |     |            |              |         |         |
|--------|-----------------|------|----|-----|------------|--------------|---------|---------|
| tuning | Segmentation_18 | 0.01 | 21 | 20  | 0.00236981 | -33.98405622 |         | 3.08    |
| tuning | Segmentation_18 | 0.1  | 21 | 20  | 0.0236981  | -33.98411564 |         | 3.03    |
| tuning | Segmentation_18 | 0.5  | 21 | 20  | 0.11849    | -35.86757755 |         | 3.05    |
| tuning | Segmentation_18 | 1    | 21 | 20  | 0.236981   | -45.64502655 |         | 2.98    |
| tuning | Segmentation_19 | 0.01 | 21 | 20  | 0.00243372 | -24.07501592 |         | 3.14    |
| tuning | Segmentation_19 | 0.1  | 21 | 20  | 0.0243372  | -24.07501592 |         | 3.13    |
| tuning | Segmentation_19 | 0.5  | 21 | 20  | 0.121686   | -24.47331743 |         | 2.97    |
| tuning | Segmentation_19 | 1    | 21 | 20  | 0.243372   | -33.36002376 |         | 3.06    |
| tuning | Segmentation_20 | 0.01 | 5  | 21  | 0.00235781 | -112.0022081 | 39.07   | 3631.72 |
| tuning | Segmentation_20 | 0.1  | 5  | 21  | 0.0235781  | -115.8986261 | 33.97   | 3631.28 |
| tuning | Segmentation_20 | 0.5  | 5  | 21  | 0.11789    | -124.5961515 | 31.47   | 1156.65 |
| tuning | Segmentation_20 | 1    | 5  | 21  | 0.235781   | -143.851647  | 31.04   | 129.11  |
| tuning | wcsp_13         | 1    | 7  | 47  | 0.884927   | 0.681915698  | 34.91   | 34.91   |
| tuning | wcsp_13         | 0.01 | 7  | 47  | 0.00884927 | 0.681915698  | 35.04   | 35.04   |
| tuning | wcsp_13         | 0.1  | 7  | 47  | 0.0884927  | 0.681915698  | 35.17   | 35.17   |
| tuning | wcsp_13         | 0.5  | 7  | 47  | 0.442463   | 0.681915698  | 35.25   | 35.25   |
| tuning | wcsp_14         | 0.01 | 8  | 48  | 0.00961495 | 1.52137732   | 79.47   | 105.8   |
| tuning | wcsp_14         | 0.1  | 8  | 48  | 0.0961495  | 1.52137732   | 81.84   | 110.53  |
| tuning | wcsp_14         | 0.5  | 8  | 48  | 0.480748   | 1.52137732   | 82.86   | 112.22  |
| tuning | wcsp_14         | 1    | 8  | 48  | 0.961495   | 1.497503238  | 68.29   | 75.24   |
| tuning | wcsp_15         | 0.1  | 10 | 66  | 0.00001    | -162.0165851 | 16.2    | 3610.33 |
| tuning | wcsp_15         | 1    | 10 | 66  | 0.0001     | -162.0165851 | 16.24   | 3610.35 |
| tuning | wcsp_15         | 0.01 | 10 | 66  | 0.000001   | -162.0165851 | 16.28   | 3610.34 |
| tuning | wcsp_15         | 0.5  | 10 | 66  | 0.00005    | -162.0165851 | 16.35   | 3610.4  |
| tuning | wcsp_18         | 0.01 | 5  | 38  | 0.00965032 | 2.22791633   | 84.94   | 85.17   |
| tuning | wcsp_18         | 0.5  | 5  | 38  | 0.482516   | 2.22791633   | 84.94   | 85.17   |
| tuning | wcsp_18         | 0.1  | 5  | 38  | 0.0965032  | 2.22791633   | 85.04   | 85.28   |
| tuning | wcsp_18         | 1    | 5  | 38  | 0.965032   | 0.2069791    | 81.67   | 81.69   |
| final  | 75-17-5.Q0.5.I4 | 0.1  | 24 | 110 | 0.0507862  | -7.469703414 | 23.87   | 52.38   |
| final  | 75-17-5.Q0.5.I4 | 0.01 | 24 | 110 | 0.00507862 | -7.469703414 | 25.35   | 64.62   |
| final  | 75-17-5.Q0.5.I4 | 0.5  | 24 | 110 | 0.253931   | -8.23434154  | 100.49  | 158.41  |
| final  | 75-17-5.Q0.5.I4 | 1    | 24 | 110 | 0.507862   | -8.962734673 | 18.02   | 18.02   |
| final  | 75-19-5.Q0.5.I2 | 0.01 | 23 | 133 | 0.00515687 | -9.515255543 | 372.26  | 1124.45 |
| final  | 75-19-5.Q0.5.I2 | 0.1  | 23 | 133 | 0.0515687  | -9.523595344 | 310.1   | 908.12  |
| final  | 75-19-5.Q0.5.I2 | 0.5  | 23 | 133 | 0.257844   | -10.31751265 | 62.32   | 211.61  |
| final  | 75-19-5.Q0.5.I2 | 1    | 23 | 133 | 0.515687   | -11.83837168 | 11.83   | 11.83   |
| final  | 75-22-5.Q0.5.I2 | 0.01 | 23 | 110 | 0.0050371  | -11.29510488 | 240.81  | 1629.66 |
| final  | 75-22-5.Q0.5.I2 | 0.1  | 23 | 110 | 0.050371   | -11.33432875 | 230.96  | 1567.85 |
| final  | 75-22-5.Q0.5.I2 | 0.5  | 23 | 110 | 0.251855   | -12.27040593 | 56.79   | 162.86  |
| final  | 75-22-5.Q0.5.I2 | 1    | 23 | 110 | 0.50371    | -16.59980715 | 21.17   | 21.17   |
| final  | 75-23-5.Q0.5.I3 | 0.5  | 23 | 177 | 0.252393   | -13.349616   | 1529.93 | 3616.62 |
| final  | 75-23-5.Q0.5.I3 | 0.01 | 23 | 177 | 0.00504786 | -13.81083021 | 16.62   | 3616.5  |
| final  | 75-23-5.Q0.5.I3 | 0.1  | 23 | 177 | 0.0504786  | -13.82111843 | 16.63   | 3616.53 |
| final  | 75-23-5.Q0.5.I3 | 1    | 23 | 177 | 0.504786   | -16.54610264 | 17.88   | 17.88   |
| final  | 75-26-5.Q0.5.I4 | 0.5  | 22 | 208 | 0.250793   | -19.79767514 | 73      | 3615.85 |
| final  | 75-26-5.Q0.5.I4 | 0.1  | 22 | 208 | 0.0501587  | -20.53707493 | 1346.35 | 3616.11 |
| final  | 75-26-5.Q0.5.I4 | 1    | 22 | 208 | 0.501587   | -22.78595641 | 15.99   | 15.99   |
| final  | 75-26-5.Q0.5.I4 | 0.01 | 22 | 208 | 0.00501587 | -23.48080372 | 1930.77 | 3616.08 |
| final  | 90-22-5.Q0.5.I4 | 0.01 | 22 | 173 | 0.00500214 | -5.564840348 | 73.85   | 1241.43 |
| final  | 90-22-5.Q0.5.I4 | 0.1  | 22 | 173 | 0.0500214  | -5.578008904 | 66.25   | 1167.81 |
| final  | 90-22-5.Q0.5.I4 | 0.5  | 22 | 173 | 0.250107   | -5.916825424 | 19.25   | 201.9   |
| final  | 90-22-5.Q0.5.I4 | 1    | 22 | 173 | 0.500214   | -7.594913627 | 12      | 12      |
| final  | 90-24-5.Q0.5.I2 | 0.1  | 22 | 131 | 0.0506973  | -5.634420143 | 46.11   | 260.21  |
| final  | 90-24-5.Q0.5.I2 | 0.01 | 22 | 131 | 0.00506973 | -5.634420143 | 140.7   | 1833.49 |
