# Supplementary material
Source: ML conference proceedings conference paper supplement (https://openreview.net/forum?id=FrtkfqD4bCc-)
Supplement: supplementary_material [file attachment]

| Mut | Problem               | DH | iB | Solution* | Anytime | Time    | OR  | AND  |
|-----|-----------------------|----|----|-----------|---------|---------|-----|------|
| 3   | 00011_2_0_3_3         | +  | 3  | 11.85     | 7.77    | 24.64   | 3   | 15   |
|     |                       |    | 3  | 11.85     | 6.41    | 60.99   | 58  | 197  |
|     |                       |    | 4  | 11.85     | 102.17  | 102.18  | 3   | 5    |
| 3   | 00012_3_0_3_3         | +  | 3  | 13.93     | 7.54    | 22.06   | 3   | 13   |
|     |                       |    | 3  | 13.93     | 4.45    | 20.72   | 21  | 122  |
|     |                       |    | 4  | 13.93     | 69.04   | 69.05   | 3   | 4    |
| 3   | 00014_3_0_3_3         | +  | 3  | 14.36     | 8.99    | 26.95   | 3   | 16   |
|     |                       |    | 3  | 14.36     | 5.84    | 21.92   | 25  | 132  |
|     |                       |    | 4  | 14.36     | 70.87   | 70.88   | 3   | 5    |
| 3   | 00030_4_3_2_0         | +  | 3  | 11.12     | 25.39   | 54.02   | 70  | 141  |
|     |                       |    | 3  | 11.12     | 118.02  | 2019.77 | 254 | 3666 |
|     |                       |    | 4  | 11.12     | 154.24  | 154.28  | 22  | 25   |
| 4   | 00018_2_0_6_4-0-1-2-5 | +  | 3  | 16.58     | 39.97   | 598.38  | 40  | 56   |
|     |                       |    | 3  | 16.58     | 36.79   | 3488.56 | 279 | 1214 |
| 4   | 00024_4_4-0-1-2-3_3_0 | +  | 3  | 12.96     | 134.86  | 407.78  | 92  | 251  |
|     |                       |    | 3  | 12.96     | 101.94  | 487.66  | 94  | 437  |
| 4   | 00027_6_4-0-2-3-5_1_0 | +  | 3  | 15.55     | 181.79  | 405.89  | 57  | 137  |
|     |                       |    | 3  | 15.55     | 78.57   | 254.67  | 57  | 137  |
| 4   | 00028_1_0_6_4-0-1-2-3 | +  | 3  | 15.27     | 24.72   | 37.78   | 9   | 12   |
|     |                       |    | 3  | 15.27     | 17.15   | 21.62   | 9   | 19   |
| 4   | 00028_1_0_6_4-0-2-3-5 | +  | 3  | 15.27     | 23.95   | 576.98  | 93  | 230  |
|     |                       |    | 3  | 15.27     | 16.03   | 323.45  | 59  | 166  |
| 4   | 00042_3_0_7_4-0-1-2-5 | +  | 3  | 22.65     | 97.53   | 2897.35 | 18  | 61   |
|     |                       |    | 3  | 22.65     | 90.14   | 3025.80 | 24  | 114  |
| 4   | 00043_5_4-0-2-3-4_2_0 | +  | 3  | 18.04     | 22.44   | 483.55  | 346 | 476  |
|     |                       |    | 3  | 18.04     | 19.00   | 112.50  | 56  | 75   |
