# Supplementary material
Source: ML conference proceedings conference paper supplement (https://openreview.net/forum?id=FrtkfqD4bCc-)
Supplement: supplementary_material [file attachment]

| set    | problem            | delta | iB | w*  | t-final     | Solution (log10) | Anytime | Time elapsed |
|--------|--------------------|-------|----|-----|-------------|------------------|---------|--------------|
| tuning | Grids_19           | 1     | 21 | 104 | 0.17676     | 1172.158924      | 2566.68 | 3614.09      |
| tuning | Grids_23           | 0.01  | 21 | 61  | 0.00019304  | 2776.177825      | 985.86  | 3611.38      |
| tuning | Grids_23           | 0.1   | 21 | 61  | 0.0019304   | 2776.177825      | 998.67  | 3611.42      |
| tuning | Grids_23           | 0.5   | 21 | 61  | 0.009652    | 2768.861368      | 1052.97 | 3611.35      |
| tuning | Grids_23           | 1     | 21 | 61  | 0.019304    | 2741.594561      | 1547.78 | 3611.39      |
| tuning | Grids_24           | 1     | 21 | 61  | 7.1941E-06  | 8137.210041      | 1924.5  | 3610.75      |
| tuning | Grids_25           | 0.01  | 21 | 61  | 0.0020619   | 1166.326127      | 809.67  | 3610.67      |
| tuning | Grids_25           | 0.1   | 21 | 61  | 0.020619    | 1166.326127      | 813.22  | 3610.71      |
| tuning | Grids_25           | 0.5   | 21 | 61  | 0.103095    | 1166.326127      | 824.72  | 3610.63      |
| tuning | Grids_25           | 1     | 21 | 61  | 0.20619     | 1155.679028      | 3456.78 | 3610.66      |
| tuning | Grids_26           | 0.5   | 24 | 49  | 0.000107565 | 1325.038005      | 16.54   | 16.55        |
| tuning | Grids_26           | 0.01  | 24 | 49  | 2.1513E-06  | 1325.038005      | 19.91   | 20.02        |
| tuning | Grids_26           | 0.1   | 24 | 49  | 0.000021513 | 1325.038005      | 20.04   | 20.15        |
| tuning | Grids_26           | 1     | 24 | 49  | 0.00021513  | 1319.4433        | 17.38   | 17.41        |
| tuning | Grids_27           | 0.5   | 21 | 61  | 0.00018633  | 5463.693962      | 598.74  | 3611.41      |
| tuning | Grids_27           | 1     | 21 | 61  | 0.00037266  | 5436.349526      | 1493.51 | 3611.38      |
| tuning | Grids_28           | 0.1   | 24 | 49  | 3.1553E-07  | 1981.75998       | 31.21   | 31.3         |
| tuning | Grids_28           | 0.01  | 24 | 49  | 3.1553E-08  | 1981.75998       | 31.32   | 31.41        |
| tuning | Grids_28           | 0.5   | 24 | 49  | 1.57765E-06 | 1979.093792      | 17.43   | 17.5         |
| tuning | Grids_28           | 1     | 24 | 49  | 3.1553E-06  | 1973.771341      | 19.42   | 19.48        |
| tuning | Grids_29           | 0.5   | 24 | 49  | 0.0073335   | 669.970751       | 14.42   | 15.72        |
| tuning | Grids_29           | 0.01  | 24 | 49  | 0.00014667  | 669.970751       | 14.6    | 15.91        |
| tuning | Grids_29           | 0.1   | 24 | 49  | 0.0014667   | 669.970751       | 14.72   | 16.06        |
| tuning | Grids_29           | 1     | 24 | 49  | 0.014667    | 665.7480172      | 19.5    | 19.53        |
| tuning | Grids_30           | 0.1   | 25 | 27  | 0.000077262 | 1309.721293      | 13.01   | 13.01        |
| tuning | Grids_30           | 0.01  | 25 | 27  | 7.7262E-06  | 1309.721293      | 13.09   | 13.1         |
| tuning | Grids_30           | 0.5   | 25 | 27  | 0.00038631  | 1302.485739      | 13.06   | 13.07        |
| tuning | Grids_30           | 1     | 25 | 27  | 0.00077262  | 1285.539227      | 12.99   | 13           |
| tuning | ImageAlignment_11  | 0.5   | 3  | 33  | 2.375E-10   | -824.2340241     | 27.97   | 129.18       |
| tuning | ImageAlignment_11  | 1     | 3  | 33  | 4.75E-10    | -824.2340241     | 28.17   | 130.29       |
| tuning | ImageAlignment_11  | 0.01  | 3  | 33  | 4.75E-12    | -824.2340241     | 28.37   | 132.6        |
| tuning | ImageAlignment_11  | 0.1   | 3  | 33  | 4.75E-11    | -824.2340241     | 28.46   | 134.24       |
| tuning | ImageAlignment_12  | 0.01  | 5  | 29  | 0.000001    | -436.6694109     | 83.42   | 83.43        |
| tuning | ImageAlignment_12  | 0.5   | 5  | 29  | 0.00005     | -436.6694109     | 83.52   | 83.53        |
| tuning | ImageAlignment_12  | 0.1   | 5  | 29  | 0.00001     | -436.6694109     | 83.59   | 83.6         |
| tuning | ImageAlignment_12  | 1     | 5  | 29  | 0.0001      | -436.6694109     | 84.01   | 84.01        |
| tuning | ImageAlignment_13  | 1     | 3  | 21  | 4.75E-10    | -2999.933955     | 57.46   | 1293.09      |
| tuning | ImageAlignment_13  | 0.1   | 3  | 21  | 4.75E-11    | -2999.933955     | 57.5    | 1293.66      |
| tuning | ImageAlignment_13  | 0.01  | 3  | 21  | 4.75E-12    | -2999.933955     | 57.54   | 1295.18      |
| tuning | ImageAlignment_13  | 0.5   | 3  | 21  | 2.375E-10   | -2999.933955     | 57.8    | 1308.23      |
| tuning | ImageAlignment_14  | 0.01  | 4  | 23  | 1.22842E-12 | -1557.513069     | 47.12   | 47.93        |
| tuning | ImageAlignment_14  | 0.5   | 4  | 23  | 6.14208E-11 | -1557.513069     | 47.14   | 47.94        |
| tuning | ImageAlignment_14  | 0.1   | 4  | 23  | 1.22842E-11 | -1557.513069     | 48.2    | 49.01        |
| tuning | ImageAlignment_14  | 1     | 4  | 23  | 1.22842E-10 | -1557.513069     | 48.25   | 49.06        |
| tuning | ImageAlignment_15  | 0.01  | 4  | 24  | 4.75E-12    | -1177.484737     | 149.78  | 223.27       |
| tuning | ImageAlignment_15  | 1     | 4  | 24  | 4.75E-10    | -1177.484737     | 150.16  | 223.23       |
| tuning | ImageAlignment_15  | 0.1   | 4  | 24  | 4.75E-11    | -1177.484737     | 150.39  | 223.48       |
| tuning | ImageAlignment_15  | 0.5   | 4  | 24  | 2.375E-10   | -1177.484737     | 150.44  | 223.56       |
| tuning | ObjectDetection_11 | 1     | 6  | 59  | 9.5551E-101 | 3605.357329      | 540.33  | 3627.16      |
| tuning | ObjectDetection_11 | 0.5   | 6  | 59  | 4.7776E-101 | 3605.357329      | 542.93  | 3627.06      |
| tuning | ObjectDetection_11 | 0.1   | 6  | 59  | 9.5551E-102 | 3605.357329      | 556.74  | 3627.17      |
| tuning | ObjectDetection_11 | 0.01  | 6  | 59  | 9.5551E-103 | 3605.357329      | 557.04  | 3626.92      |
| tuning | ObjectDetection_12 | 1     | 5  | 59  | 9.5551E-101 | 5841.010658      | 269.7   | 3626.54      |
