# Supplementary material
Source: ML conference proceedings conference paper supplement (https://openreview.net/forum?id=FrtkfqD4bCc-)
Supplement: supplementary_material [file attachment]

|       |                        |      |    |     |            |              |         |         |
|-------|------------------------|------|----|-----|------------|--------------|---------|---------|
| final | or_chain_43.fg.Q0.5.I3 | 1    | 21 | 216 | 0.03       | -30.51462812 | 38.05   | 38.05   |
| final | or_chain_43.fg.Q0.5.I3 | 0.5  | 21 | 216 | 0.015      | -30.51462812 | 38.07   | 38.07   |
| final | or_chain_6.fg.Q0.5.I3  | 1    | 21 | 386 | 0.0002     | -38.68242503 | 2639.92 | 3702.78 |
| final | or_chain_6.fg.Q0.5.I3  | 0.5  | 21 | 386 | 0.0001     | -42.30847548 | 2552.11 | 3702.78 |
| final | or_chain_6.fg.Q0.5.I3  | 0.01 | 21 | 386 | 0.000002   | -43.50035519 | 2790.26 | 3703.84 |
| final | or_chain_6.fg.Q0.5.I3  | 0.1  | 21 | 386 | 0.00002    | -43.50593718 | 2345.61 | 3702.83 |
| final | or_chain_60.fg.Q0.5.I3 | 1    | 20 | 552 | 0.0002     | -51.80564751 | 1590.82 | 3729.64 |
| final | or_chain_60.fg.Q0.5.I3 | 0.5  | 20 | 552 | 0.0001     | -64.90935365 | 1713.29 | 3729.91 |
| final | or_chain_60.fg.Q0.5.I3 | 0.01 | 20 | 552 | 0.000002   | -66.27869848 | 144.48  | 3743.93 |
| final | or_chain_60.fg.Q0.5.I3 | 0.1  | 20 | 552 | 0.00002    | -66.27878503 | 135.93  | 3735.43 |
| final | or_chain_63.fg.Q0.5.I3 | 0.01 | 22 | 97  | 0.0003     | -10.41735584 | 24.23   | 26.32   |
| final | or_chain_63.fg.Q0.5.I3 | 0.1  | 22 | 97  | 0.003      | -10.76585547 | 12.63   | 12.64   |
| final | or_chain_63.fg.Q0.5.I3 | 0.5  | 22 | 97  | 0.015      | -10.76784433 | 12.56   | 12.56   |
| final | or_chain_63.fg.Q0.5.I3 | 1    | 22 | 97  | 0.03       | -10.76784433 | 12.67   | 12.67   |
| final | or_chain_8.fg.Q0.5.I3  | 0.01 | 22 | 63  | 0.0003     | -7.278405689 | 36.64   | 62.75   |
| final | or_chain_8.fg.Q0.5.I3  | 0.1  | 22 | 63  | 0.003      | -9.676037766 | 10.23   | 10.28   |
| final | or_chain_8.fg.Q0.5.I3  | 1    | 22 | 63  | 0.03       | -12.23702949 | 10.19   | 10.19   |
| final | or_chain_8.fg.Q0.5.I3  | 0.5  | 22 | 63  | 0.015      | -12.23702949 | 10.24   | 10.24   |
| final | pedigree1.Q0.5.I3      | 0.01 | 20 | 105 | 0.00135    | -34.99031034 | 3346.6  | 3633.98 |
| final | pedigree1.Q0.5.I3      | 0.1  | 20 | 105 | 0.0135     | -34.99031034 | 3372.85 | 3634.07 |
| final | pedigree1.Q0.5.I3      | 0.5  | 20 | 105 | 0.0675     | -35.05547157 | 3318.03 | 3633.78 |
| final | pedigree1.Q0.5.I3      | 1    | 20 | 105 | 0.135      | -35.72970709 | 2909.94 | 3632.73 |
| final | pedigree13.Q0.5.I1     | 0.01 | 20 | 138 | 0.00009389 | -62.60764427 | 1631.05 | 3615.94 |
| final | pedigree13.Q0.5.I1     | 0.1  | 20 | 138 | 0.0009389  | -62.60764427 | 1641.08 | 3616.03 |
| final | pedigree13.Q0.5.I1     | 0.5  | 20 | 138 | 0.0046945  | -62.60972384 | 1576.75 | 3615.96 |
| final | pedigree13.Q0.5.I1     | 1    | 20 | 138 | 0.009389   | -62.61268452 | 1549.81 | 3615.95 |
| final | pedigree19.Q0.5.I4     | 0.1  | 16 | 173 | 0.0057174  | -93.06172686 | 1205.22 | 3611.7  |
| final | pedigree19.Q0.5.I4     | 0.01 | 16 | 173 | 0.00057174 | -93.06172686 | 1205.87 | 3611.69 |
| final | pedigree19.Q0.5.I4     | 0.5  | 16 | 173 | 0.028587   | -93.08742659 | 1188.16 | 3611.77 |
| final | pedigree19.Q0.5.I4     | 1    | 16 | 173 | 0.057174   | -97.06587617 | 490.71  | 3611.49 |
| final | pedigree20.Q0.5.I2     | 0.01 | 17 | 76  | 0.00005    | -46.34945528 | 1958.13 | 3607.75 |
| final | pedigree20.Q0.5.I2     | 0.1  | 17 | 76  | 0.0005     | -46.34945528 | 1967.96 | 3607.73 |
| final | pedigree20.Q0.5.I2     | 0.5  | 17 | 76  | 0.0025     | -46.34945528 | 1969.13 | 3607.77 |
| final | pedigree20.Q0.5.I2     | 1    | 17 | 76  | 0.005      | -46.37220741 | 1971.73 | 3607.73 |
| final | pedigree25.Q0.5.I2     | 1    | 21 | 178 | 0.018294   | -149.4755823 | 2217.37 | 3623.59 |
| final | pedigree25.Q0.5.I2     | 0.5  | 21 | 178 | 0.009147   | -149.4755823 | 2232.01 | 3623.66 |
| final | pedigree25.Q0.5.I2     | 0.1  | 21 | 178 | 0.0018294  | -149.4755823 | 2234.81 | 3623.57 |
| final | pedigree25.Q0.5.I2     | 0.01 | 21 | 178 | 0.00018294 | -149.4755823 | 2250.29 | 3623.59 |
| final | pedigree38.Q0.5.I2     | 0.1  | 16 | 164 | 0.0002969  | -94.18620535 | 111.19  | 3622.14 |
| final | pedigree38.Q0.5.I2     | 0.5  | 16 | 164 | 0.0014845  | -94.18620535 | 111.21  | 3622.26 |
| final | pedigree38.Q0.5.I2     | 0.01 | 16 | 164 | 0.00002969 | -94.18620535 | 111.44  | 3622.1  |
| final | pedigree38.Q0.5.I2     | 1    | 16 | 164 | 0.002969   | -94.18620535 | 111.62  | 3622.16 |
| final | pedigree41.Q0.5.I2     | 0.01 | 19 | 205 | 0.0002539  | -116.9969801 | 27.06   | 3620.6  |
| final | pedigree41.Q0.5.I2     | 0.1  | 19 | 205 | 0.002539   | -116.9972832 | 26.92   | 3620.61 |
| final | pedigree41.Q0.5.I2     | 0.5  | 19 | 205 | 0.012695   | -117.0041368 | 26.94   | 3620.57 |
| final | pedigree41.Q0.5.I2     | 1    | 19 | 205 | 0.02539    | -117.0208283 | 26.99   | 3620.57 |
| final | pedigree44.Q0.5.I4     | 0.1  | 18 | 186 | 0.0015705  | -93.75262107 | 3054.2  | 3610.8  |
| final | pedigree44.Q0.5.I4     | 0.01 | 18 | 186 | 0.00015705 | -93.75262107 | 3055    | 3610.82 |
| final | pedigree44.Q0.5.I4     | 0.5  | 18 | 186 | 0.0078525  | -93.75410245 | 3060.69 | 3610.83 |
| final | pedigree44.Q0.5.I4     | 1    | 18 | 186 | 0.015705   | -93.75410245 | 3072.46 | 3610.76 |
| final | pedigree50.Q0.5.I1     | 1    | 15 | 124 | 0.100469   | -54.16486916 | 158.08  | 3611.48 |
| final | pedigree50.Q0.5.I1     | 0.01 | 15 | 124 | 0.00100469 | -55.13789596 | 40.5    | 3611.49 |
| final | pedigree50.Q0.5.I1     | 0.1  | 15 | 124 | 0.0100469  | -55.14068748 | 36.35   | 3611.51 |
| final | pedigree50.Q0.5.I1     | 0.5  | 15 | 124 | 0.0502345  | -55.19336336 | 29.02   | 3611.55 |
