# Supplementary material
Source: ML conference proceedings conference paper supplement (https://openreview.net/forum?id=FrtkfqD4bCc-)
Supplement: supplementary_material [file attachment]

|        |                   |      |    |    |             |              |        |         |
|--------|-------------------|------|----|----|-------------|--------------|--------|---------|
| tuning | ProteinFolding_24 | 0.5  | 5  | 59 | 4.7647E-101 | 2517.508631  | 867.34 | 3626.83 |
| tuning | ProteinFolding_24 | 0.01 | 5  | 59 | 9.5295E-103 | 2517.508631  | 878.07 | 3626.47 |
| tuning | ProteinFolding_25 | 1    | 5  | 59 | 9.5029E-101 | 6937.832955  | 103.55 | 3691.75 |
| tuning | ProteinFolding_25 | 0.1  | 5  | 59 | 9.5029E-102 | 6937.832955  | 103.62 | 3691.86 |
| tuning | ProteinFolding_25 | 0.01 | 5  | 59 | 9.5029E-103 | 6937.832955  | 104.01 | 3692.24 |
| tuning | ProteinFolding_25 | 0.5  | 5  | 59 | 4.7514E-101 | 6937.832955  | 104.24 | 3692.61 |
| tuning | Segmentation_11   | 0.1  | 5  | 19 | 0.0219671   | -135.8297966 | 28.53  | 61.3    |
| tuning | Segmentation_11   | 0.01 | 5  | 19 | 0.00219671  | -135.8297966 | 846.42 | 890.59  |
| tuning | Segmentation_11   | 0.5  | 5  | 19 | 0.109835    | -145.1953675 | 47.29  | 91.67   |
| tuning | Segmentation_11   | 1    | 5  | 19 | 0.219671    | -158.3305586 | 28.35  | 59.26   |
| tuning | Segmentation_12   | 0.01 | 19 | 18 | 0.00268962  | -22.2144464  |        | 2.85    |
| tuning | Segmentation_12   | 0.1  | 19 | 18 | 0.0268962   | -23.25403231 |        | 2.96    |
| tuning | Segmentation_12   | 0.5  | 19 | 18 | 0.134481    | -24.87792488 |        | 2.81    |
| tuning | Segmentation_12   | 1    | 19 | 18 | 0.268962    | -37.543804   |        | 2.83    |
| tuning | Segmentation_13   | 0.01 | 19 | 18 | 0.00259491  | -21.65337774 |        | 3.92    |
| tuning | Segmentation_13   | 0.1  | 19 | 18 | 0.0259491   | -21.65337774 |        | 3.84    |
| tuning | Segmentation_13   | 0.5  | 19 | 18 | 0.129745    | -21.65337774 |        | 3.81    |
| tuning | Segmentation_13   | 1    | 19 | 18 | 0.259491    | -30.285559   |        | 3.84    |
| tuning | Segmentation_14   | 0.01 | 19 | 18 | 0.00252815  | -40.09995389 |        | 2.86    |
| tuning | Segmentation_14   | 0.1  | 19 | 18 | 0.0252815   | -40.09995389 |        | 2.93    |
| tuning | Segmentation_14   | 0.5  | 19 | 18 | 0.126408    | -40.09995389 |        | 2.89    |
| tuning | Segmentation_14   | 1    | 19 | 18 | 0.252815    | -41.23680188 |        | 2.85    |
| tuning | Segmentation_15   | 0.1  | 5  | 18 | 0.0220046   | -165.2026467 | 74.27  | 461.21  |
| tuning | Segmentation_15   | 0.01 | 5  | 18 | 0.00220046  | -165.2026467 | 365.52 | 1974.49 |
| tuning | Segmentation_15   | 0.5  | 5  | 18 | 0.110023    | -173.5865224 | 56.4   | 3628.57 |
| tuning | Segmentation_15   | 1    | 5  | 18 | 0.220046    | -187.7852976 | 163.56 | 209.92  |
| tuning | Segmentation_16   | 0.01 | 19 | 18 | 0.00259246  | -41.25794627 |        | 2.9     |
| tuning | Segmentation_16   | 0.1  | 19 | 18 | 0.0259246   | -41.25794627 |        | 2.82    |
| tuning | Segmentation_16   | 0.5  | 19 | 18 | 0.129623    | -41.25794627 |        | 2.91    |
| tuning | Segmentation_16   | 1    | 19 | 18 | 0.259246    | -43.36166364 |        | 2.8     |
| tuning | Segmentation_17   | 0.01 | 5  | 21 | 0.00244133  | -177.2178296 | 29.36  | 3627.52 |
| tuning | Segmentation_17   | 0.1  | 5  | 21 | 0.0244133   | -177.3614154 | 28.36  | 3627.76 |
| tuning | Segmentation_17   | 0.5  | 5  | 21 | 0.122066    | -181.9528847 | 28.4   | 3163.47 |
| tuning | Segmentation_17   | 1    | 5  | 21 | 0.244133    | -188.9579928 | 27.73  | 116.66  |
| tuning | Segmentation_18   | 0.01 | 22 | 21 | 0.00236981  | -35.90291107 |        | 3.56    |
| tuning | Segmentation_18   | 0.1  | 22 | 21 | 0.0236981   | -35.90291107 |        | 3.4     |
| tuning | Segmentation_18   | 0.5  | 22 | 21 | 0.11849     | -37.78837975 |        | 3.55    |
| tuning | Segmentation_18   | 1    | 22 | 21 | 0.236981    | -47.38911176 |        | 3.51    |
| tuning | Segmentation_19   | 0.01 | 20 | 19 | 0.00243372  | -25.49490612 |        | 2.84    |
| tuning | Segmentation_19   | 0.1  | 20 | 19 | 0.0243372   | -25.49490612 |        | 2.99    |
| tuning | Segmentation_19   | 0.5  | 20 | 19 | 0.121686    | -25.82077231 |        | 2.99    |
| tuning | Segmentation_19   | 1    | 20 | 19 | 0.243372    | -34.58545591 |        | 2.93    |
| tuning | Segmentation_20   | 0.01 | 5  | 20 | 0.00235781  | -113.8787963 | 1357.6 | 3628.94 |
| tuning | Segmentation_20   | 0.1  | 5  | 20 | 0.0235781   | -117.8289587 | 30.89  | 3629.18 |
| tuning | Segmentation_20   | 0.5  | 5  | 20 | 0.11789     | -127.8555901 | 29.71  | 847.24  |
| tuning | Segmentation_20   | 1    | 5  | 20 | 0.235781    | -147.1478039 | 29.09  | 53.46   |
| tuning | wcsp_11           | 1    | 10 | 79 | 0.945088    | -3.33708406  | 18.65  | 3618.59 |
| tuning | wcsp_11           | 0.1  | 10 | 79 | 0.0945088   | -3.33708406  | 18.76  | 3618.7  |
| tuning | wcsp_11           | 0.01 | 10 | 79 | 0.00945088  | -3.33708406  | 18.76  | 3618.69 |
| tuning | wcsp_11           | 0.5  | 10 | 79 | 0.472544    | -3.33708406  | 18.8   | 3618.73 |
| tuning | wcsp_12           | 0.5  | 10 | 55 | 0.402638    | -2.95513544  | 252.78 | 3615.11 |
| tuning | wcsp_12           | 1    | 10 | 55 | 0.805275    | -2.95513544  | 253.39 | 3615.23 |
| tuning | wcsp_12           | 0.1  | 10 | 55 | 0.0805275   | -2.95513544  | 253.46 | 3615.4  |
| tuning | wcsp_12           | 0.01 | 10 | 55 | 0.00805275  | -2.95513544  | 254.91 | 3615.43 |
