# Supplementary material
Source: ML conference proceedings conference paper supplement (https://openreview.net/forum?id=FrtkfqD4bCc-)
Supplement: supplementary_material [file attachment]

|                 | Problem Statistics |      |   | AOBB-UFO |        |          | UAI 2022 Competition Competing Solvers |           |        |        |          |        |        |        |
|-----------------|--------------------|------|---|----------|--------|----------|----------------------------------------|-----------|--------|--------|----------|--------|--------|--------|
| Problem         | X  ;  F            | w*   | k | Anytime  | Time   | Solution | braobb                                 | daoopt-lh | daoopt | lbp    | toulbar2 |        |        | uai14  |
|                 |                    |      |   |          |        |          |                                        |           |        |        | ipr      | vacint | vns    |        |
| 75-17-5.Q0.5.l4 | 289 ; 289          | 110  | 2 | 18.1     | 18.06  | -7.7     | -7.5                                   | -7.7      | -7.7   |        | -7.7     | -7.7   | -7.7   | -14.1  |
| 75-19-5.Q0.5.l2 | 361 ; 361          | 133  | 2 | 15.7     | 15.66  | -10.1    | -9.7                                   | -9.6      | -9.6   |        | -9.6     | -9.6   | -9.6   | -15.9  |
| 75-22-5.Q0.5.l2 | 484 ; 484          | 110  | 2 | 37.6     | 37.59  | -12.8    |                                        | -11.8     | -11.7  |        | -11.7    | -11.7  | -11.7  |        |
| 75-23-5.Q0.5.l3 | 529 ; 529          | 177  | 2 | 17.9     | 17.95  | -13.7    | -13.8                                  | -12.5     | -12.5  |        | -12.5    | -12.5  | -12.5  |        |
| 75-26-5.Q0.5.l4 | 676 ; 676          | 208  | 2 | 31.5     | 31.46  | -19      | -18.3                                  | -18.1     | -18.1  |        | -18.1    | -18.1  | -18.1  |        |
| 90-22-5.Q0.5.l4 | 484 ; 484          | 173  | 2 | 39.4     | 39.39  | -6.4     | -5.6                                   | -5.6      | -5.6   |        | -5.6     | -5.6   | -5.6   |        |
| 90-24-5.Q0.5.l2 | 576 ; 576          | 131  | 2 | 27.4     | 27.37  | -5.8     | -5.6                                   | -5.7      | -5.7   |        | -5.7     | -5.7   | -5.7   |        |
| 90-25-5.Q0.5.l2 | 625 ; 625          | 174  | 2 | 21.4     | 21.44  | -7.9     |                                        | -7.8      | -7.7   |        | -7.7     | -7.7   | -7.7   |        |
| 90-26-5.Q0.5.l1 | 676 ; 676          | 110  | 2 | 27       | 26.96  | -8.8     |                                        | -9.1      | -8.7   |        | -8.7     | -8.7   | -8.7   |        |
| 90-30-5.Q0.5.l1 | 900 ; 900          | 246  | 2 | 36.1     | 36.14  | -11      | -11.5                                  | -10.9     | -10.9  |        | -10.9    | -10.9  | -10.9  |        |
| 90-34-5.Q0.5.l2 | 1156 ; 1156        | 352  | 2 | 29.6     | 29.63  | -12.7    |                                        | -14.2     | -12.2  |        | -12.2    | -12.2  | -12.2  |        |
| 90-38-5.Q0.5.l4 | 1444 ; 1444        | 371  | 2 | 44.9     | 44.86  | -17.1    |                                        |           | -16.8  |        | -16.8    | -16.8  | -16.8  |        |
| 90-42-5.Q0.5.l4 | 1764 ; 1764        | 300  | 2 | 40.6     | 40.59  | -17.3    |                                        |           | -17    |        | -17      | -17    | -17    |        |
| 90-46-5.Q0.5.l4 | 2116 ; 2116        | 356  | 2 | 46       | 45.95  | -26      |                                        |           | -24.8  |        | -24.9    | -24.9  | -24.5  |        |
| 90-50-5.Q0.5.l3 | 2500 ; 2500        | 788  | 2 | 201.2    | 201.21 | -26.3    | -36.9                                  |           | -26.8  |        | -25.7    | -25.7  | -25.7  |        |
| bw_p24_16       | 937 ; 937          | 136  | 3 | 82.8     | 3682.8 |          |                                        |           |        |        |          |        |        |        |
| bw_p24_20       | 1169 ; 1169        | 171  | 3 | 105.2    | 3705.2 |          |                                        |           |        |        |          |        |        |        |
| bw_p34_15       | 2191 ; 2191        | 294  | 3 | 59.2     | 3659.2 |          |                                        |           |        |        |          |        |        |        |
| bw_p34_20       | 2916 ; 2916        | 389  | 3 | 108.5    | 3708.5 |          |                                        |           |        |        |          |        |        |        |
| bw_p44_15       | 4075 ; 4075        | 638  | 3 | 514.1    | 4114.1 |          |                                        |           |        |        |          |        |        |        |
| bw_p44_19       | 5155 ; 5155        | 722  | 3 | 828.9    | 4428.9 |          |                                        |           |        |        |          |        |        |        |
| bw_p54_10       | 4366 ; 4366        | 777  | 3 | 911.2    | 911.25 | -1       |                                        |           |        |        |          |        |        |        |
| bw_p54_16       | 6964 ; 6964        | 1134 | 3 |          |        |          |                                        |           |        |        |          |        |        |        |
| comm_p01_16     | 4477 ; 4477        | 831  | 2 | 266.9    | 3866.9 |          |                                        |           |        |        |          |        |        |        |
| comm_p01_20     | 5585 ; 5585        | 1039 | 2 | 453.8    | 4053.8 |          |                                        |           |        |        |          |        |        |        |
| Grids_20        | 6400 ; 19040       | 122  | 2 | 63.8     | 3663.8 |          | 4518.7                                 | 4833.9    | 4839   | 4804.9 | 4837.5   | 4816.7 | 4836.5 |        |
| Grids_21        | 1600 ; 4800        | 108  | 2 | 50.9     | 3650.9 |          | 8002.4                                 | 8429.3    | 8499.7 | 8322.9 | 8499.7   | 8357.8 | 8438.1 | 8222.4 |
| Grids_22        | 1600 ; 4800        | 97   | 2 | 53.1     | 3653.1 |          | 2687.2                                 | 2833.8    | 2835.2 | 2763.4 | 2835.2   | 2797.1 | 2823.4 | 2790.8 |
| Grids_23        | 1600 ; 4720        | 73   | 2 | 40       | 3640   |          | 2787.3                                 | 2793.4    | 2793   | 2739.2 | 2793     | 2778.7 | 2780.3 | 2765   |
| Grids_24        | 1600 ; 4720        | 61   | 2 | 40.9     | 3640.9 |          | 8204.5                                 | 8234.4    | 8237.3 | 8106.5 | 8237.3   | 8160.9 | 8175.2 | 8023.4 |
| Grids_25        | 1600 ; 4720        | 63   | 2 | 71.2     | 3671.2 |          | 1209.9                                 | 1208.9    | 1209.3 | 1204.6 | 1209.3   | 1199.5 | 1209.1 | 1209   |
| Grids_26        | 400 ; 1200         | 59   | 2 | 58.7     | 3658.7 |          | 1322.2                                 | 1326.3    | 1326.3 | 1300.4 | 1326.3   | 1321.4 | 1322.2 | 1280.9 |
| Grids_27        | 1600 ; 4720        | 69   | 2 | 38.5     | 3638.5 |          | 5507                                   | 5506.8    | 5508.9 | 5383.1 | 5508.9   | 5422.5 | 5489.7 | 5378.4 |
| Grids_28        | 400 ; 1200         | 53   | 2 | 90       | 3690   |          | 1969.1                                 | 1982.5    | 1982.5 | 1924.7 | 1982.5   | 1978.2 | 1972.6 | 1948.2 |
| Grids_29        | 400 ; 1200         | 54   | 2 | 83.6     | 3683.6 |          | 669.2                                  | 673       | 673    | 662.6  | 673      | 672.3  | 670.4  | 666.3  |
