# Supplementary material
Source: ML conference proceedings conference paper supplement (https://openreview.net/forum?id=FrtkfqD4bCc-)
Supplement: supplementary_material [file attachment]

|        |             |      |    |    |          |              |       |       |
|--------|-------------|------|----|----|----------|--------------|-------|-------|
| tuning | Promedas_58 | 1    | 24 | 55 | 0.03     | -27.4557487  | 12.58 | 12.58 |
| tuning | Promedas_58 | 0.5  | 24 | 55 | 0.015    | -27.4557487  | 12.61 | 12.61 |
| tuning | Promedas_58 | 0.1  | 24 | 55 | 0.003    | -27.4557487  | 12.66 | 12.67 |
| tuning | Promedas_59 | 1    | 24 | 41 | 0.0002   | -10.55519694 | 13.57 | 14.65 |
| tuning | Promedas_59 | 0.5  | 24 | 41 | 0.0001   | -10.55519694 | 16.36 | 20.14 |
| tuning | Promedas_59 | 0.1  | 24 | 41 | 0.00002  | -10.55519694 | 17.5  | 22.75 |
| tuning | Promedas_59 | 0.01 | 24 | 41 | 0.000002 | -10.55519694 | 17.87 | 23.36 |
| tuning | Promedas_60 | 1    | 25 | 34 | 0.0002   | -10.03646616 | 12.97 | 13.04 |
| tuning | Promedas_60 | 0.5  | 25 | 34 | 0.0001   | -10.03646616 | 14.7  | 14.9  |
| tuning | Promedas_60 | 0.1  | 25 | 34 | 0.00002  | -10.03646616 | 15.95 | 16.2  |
| tuning | Promedas_60 | 0.01 | 25 | 34 | 0.000002 | -10.03646616 | 16.43 | 16.71 |
| tuning | Promedas_61 | 0.01 | 23 | 47 | 0.0003   | -6.90667048  | 10.9  | 11.15 |
| tuning | Promedas_61 | 1    | 23 | 47 | 0.03     | -10.68402217 | 9     | 9     |
| tuning | Promedas_61 | 0.1  | 23 | 47 | 0.003    | -10.68402217 | 9.04  | 9.04  |
| tuning | Promedas_61 | 0.5  | 23 | 47 | 0.015    | -10.68402217 | 9.05  | 9.05  |
| tuning | Promedas_62 | 0.01 | 24 | 35 | 0.0003   | -4.665398548 | 10.97 | 11.01 |
| tuning | Promedas_62 | 0.1  | 24 | 35 | 0.003    | -4.665398548 | 11.11 | 11.11 |
| tuning | Promedas_62 | 0.5  | 24 | 35 | 0.015    | -4.665398548 | 11.22 | 11.22 |
| tuning | Promedas_62 | 1    | 24 | 35 | 0.03     | -4.665398548 | 11.42 | 11.42 |
| tuning | Promedas_63 | 1    | 23 | 45 | 0.03     | -6.09336204  | 11.09 | 11.09 |
| tuning | Promedas_63 | 0.1  | 23 | 45 | 0.003    | -6.09336204  | 11.12 | 11.12 |
| tuning | Promedas_63 | 0.5  | 23 | 45 | 0.015    | -6.09336204  | 11.17 | 11.17 |
| tuning | Promedas_63 | 0.01 | 23 | 45 | 0.0003   | -6.09336204  | 12.2  | 12.22 |
| tuning | Promedas_64 | 1    | 23 | 43 | 0.0002   | -11.46978612 | 7.62  | 7.62  |
| tuning | Promedas_64 | 0.5  | 23 | 43 | 0.0001   | -11.46978612 | 8.39  | 8.39  |
| tuning | Promedas_64 | 0.1  | 23 | 43 | 0.00002  | -11.46978612 | 9.4   | 9.4   |
| tuning | Promedas_64 | 0.01 | 23 | 43 | 0.000002 | -11.46978612 | 9.46  | 9.46  |
| tuning | Promedas_65 | 0.01 | 25 | 28 | 0.0003   | -5.156746083 | 11.39 | 11.4  |
| tuning | Promedas_65 | 0.1  | 25 | 28 | 0.003    | -7.359978813 | 11.44 | 11.44 |
| tuning | Promedas_65 | 1    | 25 | 28 | 0.03     | -7.646418273 | 10.8  | 10.8  |
| tuning | Promedas_65 | 0.5  | 25 | 28 | 0.015    | -7.646418273 | 10.91 | 10.91 |
| tuning | Promedas_66 | 0.01 | 24 | 39 | 0.0003   | -10.39210404 | 10.45 | 10.7  |
| tuning | Promedas_66 | 0.1  | 24 | 39 | 0.003    | -16.32159753 | 10.26 | 10.26 |
| tuning | Promedas_66 | 0.5  | 24 | 39 | 0.015    | -16.78412825 | 10.22 | 10.22 |
| tuning | Promedas_66 | 1    | 24 | 39 | 0.03     | -16.78412825 | 10.34 | 10.34 |
| tuning | Promedas_67 | 0.01 | 24 | 53 | 0.0003   | -15.21891111 | 20.9  | 21.06 |
| tuning | Promedas_67 | 0.1  | 24 | 53 | 0.003    | -17.48554284 | 14.11 | 14.11 |
| tuning | Promedas_67 | 1    | 24 | 53 | 0.03     | -18.3120652  | 14.1  | 14.1  |
| tuning | Promedas_67 | 0.5  | 24 | 53 | 0.015    | -18.3120652  | 14.17 | 14.17 |
| tuning | Promedas_68 | 1    | 24 | 41 | 0.0002   | -18.94074817 | 11.4  | 11.62 |
| tuning | Promedas_68 | 0.5  | 24 | 41 | 0.0001   | -18.94074817 | 12.26 | 12.64 |
| tuning | Promedas_68 | 0.1  | 24 | 41 | 0.00002  | -18.94074817 | 12.86 | 13.44 |
| tuning | Promedas_68 | 0.01 | 24 | 41 | 0.000002 | -18.94074817 | 13.03 | 13.66 |
| tuning | Promedas_69 | 0.5  | 25 | 35 | 0.0001   | -11.19236023 | 12.52 | 12.52 |
| tuning | Promedas_69 | 0.1  | 25 | 35 | 0.00002  | -11.19236023 | 12.55 | 12.55 |
| tuning | Promedas_69 | 0.01 | 25 | 35 | 0.000002 | -11.19236023 | 12.63 | 12.63 |
| tuning | Promedas_69 | 1    | 25 | 35 | 0.0002   | -11.39110656 | 12.04 | 12.04 |
| tuning | Promedas_70 | 0.01 | 24 | 23 | 0.0003   | -4.121581915 |       | 5.78  |
| tuning | Promedas_70 | 0.1  | 24 | 23 | 0.003    | -4.593481892 |       | 5.78  |
| tuning | Promedas_70 | 0.5  | 24 | 23 | 0.015    | -4.593481892 |       | 5.77  |
| tuning | Promedas_70 | 1    | 24 | 23 | 0.03     | -4.593481892 |       | 5.74  |
| tuning | Promedas_71 | 1    | 24 | 38 | 0.03     | -6.186619228 | 14.87 | 14.87 |
| tuning | Promedas_71 | 0.1  | 24 | 38 | 0.003    | -6.186619228 | 15.04 | 15.04 |
| tuning | Promedas_71 | 0.5  | 24 | 38 | 0.015    | -6.186619228 | 15.09 | 15.09 |
