# Supplementary material
Source: ML conference proceedings conference paper supplement (https://openreview.net/forum?id=FrtkfqD4bCc-)
Supplement: supplementary_material [file attachment]

|        |             |      |    |    |          |              |       |       |
|--------|-------------|------|----|----|----------|--------------|-------|-------|
| tuning | Promedas_53 | 0.5  | 23 | 63 | 0.015    | -9.253353231 | 13.02 | 13.02 |
| tuning | Promedas_53 | 1    | 23 | 63 | 0.03     | -9.253353231 | 13.02 | 13.02 |
| tuning | Promedas_54 | 0.01 | 23 | 48 | 0.000002 | -10.30872166 | 14.66 | 15.66 |
| tuning | Promedas_54 | 0.1  | 23 | 48 | 0.00002  | -10.30883838 | 14.21 | 15.11 |
| tuning | Promedas_54 | 0.5  | 23 | 48 | 0.0001   | -10.30947422 | 12.91 | 13.58 |
| tuning | Promedas_54 | 1    | 23 | 48 | 0.0002   | -10.31140454 | 11.01 | 11.31 |
| tuning | Promedas_55 | 0.01 | 24 | 45 | 0.000002 | -12.70437427 | 44.49 | 50.28 |
| tuning | Promedas_55 | 0.1  | 24 | 45 | 0.00002  | -12.70441085 | 40.95 | 46.16 |
| tuning | Promedas_55 | 0.5  | 24 | 45 | 0.0001   | -12.70495686 | 33.82 | 38.12 |
| tuning | Promedas_55 | 1    | 24 | 45 | 0.0002   | -12.7077189  | 17.39 | 18.75 |
| tuning | Promedas_56 | 0.01 | 23 | 49 | 0.0003   | -11.33734819 | 14.24 | 15.41 |
| tuning | Promedas_56 | 0.1  | 23 | 49 | 0.003    | -13.1317611  | 11.45 | 11.45 |
| tuning | Promedas_56 | 0.5  | 23 | 49 | 0.015    | -15.2614705  | 11.4  | 11.4  |
| tuning | Promedas_56 | 1    | 23 | 49 | 0.03     | -15.2614705  | 11.91 | 11.91 |
| tuning | Promedas_57 | 0.01 | 23 | 54 | 0.0003   | -10.39699847 | 10.12 | 11.33 |
| tuning | Promedas_57 | 0.1  | 23 | 54 | 0.003    | -10.7639005  | 9.65  | 9.65  |
| tuning | Promedas_57 | 1    | 23 | 54 | 0.03     | -10.76784448 | 9.55  | 9.55  |
| tuning | Promedas_57 | 0.5  | 23 | 54 | 0.015    | -10.76784448 | 9.62  | 9.62  |
| tuning | Promedas_58 | 0.01 | 23 | 50 | 0.0003   | -19.92744613 | 19.14 | 19.35 |
| tuning | Promedas_58 | 0.1  | 23 | 50 | 0.003    | -27.45359164 | 10.22 | 10.23 |
| tuning | Promedas_58 | 1    | 23 | 50 | 0.03     | -27.4557487  | 10.25 | 10.25 |
| tuning | Promedas_58 | 0.5  | 23 | 50 | 0.015    | -27.4557487  | 10.29 | 10.29 |
| tuning | Promedas_59 | 0.01 | 24 | 33 | 0.000002 | -10.5410729  | 14.03 | 16.7  |
| tuning | Promedas_59 | 0.1  | 24 | 33 | 0.00002  | -10.54113472 | 13.84 | 16.38 |
| tuning | Promedas_59 | 0.5  | 24 | 33 | 0.0001   | -10.54168725 | 13.31 | 15.38 |
| tuning | Promedas_59 | 1    | 24 | 33 | 0.0002   | -10.54441564 | 11.62 | 12.35 |
| tuning | Promedas_60 | 0.01 | 24 | 36 | 0.000002 | -10.01799308 | 14.89 | 15.18 |
| tuning | Promedas_60 | 0.1  | 24 | 36 | 0.00002  | -10.01811777 | 14.25 | 14.5  |
| tuning | Promedas_60 | 0.5  | 24 | 36 | 0.0001   | -10.01885303 | 12.97 | 13.16 |
| tuning | Promedas_60 | 1    | 24 | 36 | 0.0002   | -10.02083659 | 10.56 | 10.61 |
| tuning | Promedas_61 | 0.01 | 23 | 43 | 0.0003   | -6.901092628 | 9.71  | 10.27 |
| tuning | Promedas_61 | 1    | 23 | 43 | 0.03     | -10.68402217 | 8.49  | 8.5   |
| tuning | Promedas_61 | 0.1  | 23 | 43 | 0.003    | -10.68402217 | 8.5   | 8.5   |
| tuning | Promedas_61 | 0.5  | 23 | 43 | 0.015    | -10.68402217 | 8.53  | 8.53  |
| tuning | Promedas_62 | 0.01 | 24 | 39 | 0.0003   | -4.655356843 | 14.1  | 14.1  |
| tuning | Promedas_62 | 0.1  | 24 | 39 | 0.003    | -4.659996442 | 13.48 | 13.49 |
| tuning | Promedas_62 | 1    | 24 | 39 | 0.03     | -4.662153496 | 13.48 | 13.48 |
| tuning | Promedas_62 | 0.5  | 24 | 39 | 0.015    | -4.662153496 | 13.55 | 13.56 |
| tuning | Promedas_63 | 0.01 | 23 | 41 | 0.0003   | -6.085786311 | 12.04 | 12.13 |
| tuning | Promedas_63 | 0.1  | 23 | 41 | 0.003    | -6.091204986 | 10.58 | 10.58 |
| tuning | Promedas_63 | 0.5  | 23 | 41 | 0.015    | -6.09336204  | 10.52 | 10.52 |
| tuning | Promedas_63 | 1    | 23 | 41 | 0.03     | -6.09336204  | 10.52 | 10.52 |
| tuning | Promedas_64 | 0.01 | 24 | 39 | 0.000002 | -11.46169016 | 10.69 | 10.77 |
| tuning | Promedas_64 | 0.1  | 24 | 39 | 0.00002  | -11.46173012 | 10.89 | 10.96 |
| tuning | Promedas_64 | 0.5  | 24 | 39 | 0.0001   | -11.46214126 | 10.88 | 10.92 |
| tuning | Promedas_64 | 1    | 24 | 39 | 0.0002   | -11.46363646 | 10.68 | 10.7  |
| tuning | Promedas_65 | 0.01 | 25 | 29 | 0.0003   | -5.146320883 | 11.47 | 11.47 |
| tuning | Promedas_65 | 0.1  | 25 | 29 | 0.003    | -7.354465093 | 11.3  | 11.3  |
| tuning | Promedas_65 | 1    | 25 | 29 | 0.03     | -7.646418273 | 11.28 | 11.28 |
| tuning | Promedas_65 | 0.5  | 25 | 29 | 0.015    | -7.646418273 | 11.32 | 11.32 |
| tuning | Promedas_66 | 0.01 | 24 | 41 | 0.0003   | -10.37200305 | 12.59 | 12.66 |
| tuning | Promedas_66 | 0.1  | 24 | 41 | 0.003    | -16.31035766 | 12.08 | 12.08 |
| tuning | Promedas_66 | 1    | 24 | 41 | 0.03     | -16.78412825 | 12.18 | 12.18 |
| tuning | Promedas_66 | 0.5  | 24 | 41 | 0.015    | -16.78412825 | 12.19 | 12.19 |
