# Supplementary material
Source: ML conference proceedings conference paper supplement (https://openreview.net/forum?id=FrtkfqD4bCc-)
Supplement: supplementary_material [file attachment]

|        |                   |      |    |    |             |              |         |         |
|--------|-------------------|------|----|----|-------------|--------------|---------|---------|
| tuning | Promedas_67       | 0.01 | 23 | 48 | 0.0003      | -15.20259396 | 13.1    | 17.39   |
| tuning | Promedas_67       | 0.1  | 23 | 48 | 0.003       | -17.4846438  | 9.98    | 9.99    |
| tuning | Promedas_67       | 1    | 23 | 48 | 0.03        | -18.3120652  | 9.99    | 9.99    |
| tuning | Promedas_67       | 0.5  | 23 | 48 | 0.015       | -18.3120652  | 10.14   | 10.14   |
| tuning | Promedas_68       | 0.01 | 24 | 44 | 0.000002    | -18.91305805 | 88.99   | 113.86  |
| tuning | Promedas_68       | 0.1  | 24 | 44 | 0.00002     | -18.91316318 | 80.97   | 103.16  |
| tuning | Promedas_68       | 0.5  | 24 | 44 | 0.0001      | -18.91472568 | 56.23   | 71.5    |
| tuning | Promedas_68       | 1    | 24 | 44 | 0.0002      | -18.92238023 | 14.95   | 18.42   |
| tuning | Promedas_69       | 0.01 | 24 | 32 | 0.000002    | -11.17846529 | 11.16   | 11.51   |
| tuning | Promedas_69       | 0.1  | 24 | 32 | 0.00002     | -11.17850076 | 11.19   | 11.53   |
| tuning | Promedas_69       | 0.5  | 24 | 32 | 0.0001      | -11.17906076 | 11.22   | 11.34   |
| tuning | Promedas_69       | 1    | 24 | 32 | 0.0002      | -11.37848653 | 11.15   | 11.24   |
| tuning | Promedas_70       | 0.01 | 22 | 21 | 0.0003      | -4.109977926 |         | 4.57    |
| tuning | Promedas_70       | 0.1  | 22 | 21 | 0.003       | -4.590209297 |         | 4.43    |
| tuning | Promedas_70       | 0.5  | 22 | 21 | 0.015       | -4.593481892 |         | 4.4     |
| tuning | Promedas_70       | 1    | 22 | 21 | 0.03        | -4.593481892 |         | 4.43    |
| tuning | Promedas_71       | 0.01 | 24 | 35 | 0.0003      | -6.177520741 | 12.39   | 12.48   |
| tuning | Promedas_71       | 0.1  | 24 | 35 | 0.003       | -6.182382785 | 12.34   | 12.34   |
| tuning | Promedas_71       | 0.5  | 24 | 35 | 0.015       | -6.185934041 | 12.34   | 12.34   |
| tuning | Promedas_71       | 1    | 24 | 35 | 0.03        | -6.185934041 | 12.36   | 12.36   |
| tuning | ProteinFolding_11 | 0.01 | 24 | 28 | 2.1476E-07  | 1962.312184  | 10.58   | 10.58   |
| tuning | ProteinFolding_11 | 0.1  | 24 | 28 | 2.1476E-06  | 1958.081894  | 10.56   | 10.56   |
| tuning | ProteinFolding_11 | 0.5  | 24 | 28 | 0.000010738 | 1947.805818  | 10.49   | 10.5    |
| tuning | ProteinFolding_11 | 1    | 24 | 28 | 0.000021476 | 1925.060763  | 10.59   | 10.6    |
| tuning | ProteinFolding_12 | 0.01 | 4  | 20 | 4.75E-12    | -1547.035521 | 1612.23 | 1636.65 |
| tuning | ProteinFolding_12 | 1    | 4  | 20 | 4.75E-10    | -1547.035521 | 1613.06 | 1637.51 |
| tuning | ProteinFolding_12 | 0.1  | 4  | 20 | 4.75E-11    | -1547.035521 | 1613.58 | 1637.99 |
| tuning | ProteinFolding_12 | 0.5  | 4  | 20 | 2.375E-10   | -1547.035521 | 1614.68 | 1639.23 |
| tuning | ProteinFolding_13 | 1    | 4  | 21 | 0.000076286 | -143.3217616 | 24.5    | 24.53   |
| tuning | ProteinFolding_13 | 0.5  | 4  | 21 | 4.76787E-05 | -143.3217616 | 24.53   | 24.56   |
| tuning | ProteinFolding_13 | 0.01 | 4  | 21 | 9.53574E-07 | -143.3217616 | 24.54   | 24.57   |
| tuning | ProteinFolding_13 | 0.1  | 4  | 21 | 7.6286E-06  | -143.3217616 | 24.55   | 24.58   |
| tuning | ProteinFolding_14 | 0.01 | 4  | 20 | 9.99743E-07 | -331.7347758 | 13.39   | 13.4    |
| tuning | ProteinFolding_14 | 0.1  | 4  | 20 | 9.99743E-06 | -331.7347758 | 13.5    | 13.52   |
| tuning | ProteinFolding_14 | 1    | 4  | 20 | 9.99743E-05 | -331.7347758 | 13.62   | 13.64   |
| tuning | ProteinFolding_14 | 0.5  | 4  | 20 | 4.99872E-05 | -331.7347758 | 13.66   | 13.68   |
| tuning | ProteinFolding_15 | 1    | 5  | 22 | 0.0001      | -51.55163983 | 307.1   | 307.11  |
| tuning | ProteinFolding_15 | 0.5  | 5  | 22 | 0.00005     | -51.55163983 | 309.31  | 309.32  |
| tuning | ProteinFolding_15 | 0.1  | 5  | 22 | 0.00001     | -51.55163983 | 309.62  | 309.62  |
| tuning | ProteinFolding_15 | 0.01 | 5  | 22 | 0.000001    | -51.55163983 | 310.19  | 310.2   |
| tuning | ProteinFolding_16 | 0.01 | 4  | 18 | 1.22607E-12 | -855.521914  | 115.07  | 115.68  |
| tuning | ProteinFolding_16 | 0.1  | 4  | 18 | 1.22607E-11 | -855.521914  | 115.2   | 115.82  |
| tuning | ProteinFolding_16 | 1    | 4  | 18 | 1.22607E-10 | -855.521914  | 115.28  | 115.9   |
| tuning | ProteinFolding_16 | 0.5  | 4  | 18 | 6.13035E-11 | -855.521914  | 115.47  | 116.09  |
| tuning | ProteinFolding_17 | 0.5  | 5  | 59 | 4.751E-101  | 12178.22293  | 73.33   | 3640.73 |
| tuning | ProteinFolding_17 | 0.1  | 5  | 59 | 9.5019E-102 | 12178.22293  | 73.81   | 3640.62 |
| tuning | ProteinFolding_17 | 0.01 | 5  | 59 | 9.5019E-103 | 12178.22293  | 73.84   | 3640.78 |
| tuning | ProteinFolding_17 | 1    | 5  | 59 | 9.5019E-101 | 12178.22293  | 73.92   | 3640.62 |
| tuning | ProteinFolding_18 | 0.1  | 5  | 59 | 9.5019E-102 | 12848.69032  | 327.28  | 3751.85 |
| tuning | ProteinFolding_18 | 0.01 | 5  | 59 | 9.5019E-103 | 12848.69032  | 328.41  | 3751.66 |
| tuning | ProteinFolding_18 | 0.5  | 5  | 59 | 4.751E-101  | 12848.69032  | 330.05  | 3751.78 |
| tuning | ProteinFolding_18 | 1    | 5  | 59 | 9.5019E-101 | 12848.69032  | 331.49  | 3751.86 |
| tuning | ProteinFolding_19 | 1    | 6  | 59 | 9.7119E-101 | 1324.085264  | 63.85   | 3632.04 |
| tuning | ProteinFolding_19 | 0.1  | 6  | 59 | 9.7119E-102 | 1324.085264  | 64.19   | 3631.94 |
