# Supplementary material
Source: ML conference proceedings conference paper supplement (https://openreview.net/forum?id=FrtkfqD4bCc-)
Supplement: supplementary_material [file attachment]

| Benchmark  | Problem ID            | Algorithm   | iB | Solution* | Anytime | Time    | WT K* | BBK* Soln | BBK* Time |
|------------|-----------------------|-------------|----|-----------|---------|---------|-------|-----------|-----------|
| Expanded_4 | 00007_1_0_7_4-0-1-5-6 | AOBB-K*-UFO | 3  | 15.92     | 1890.72 | timeout | 14.08 | 15.60     | 204.06    |
| Expanded_4 | 00007_1_0_7_4-0-1-5-6 | AOBB-K*     | 3  | 14.08     | 13.69   | 13.70   | 14.08 | 15.60     | 204.06    |
| Expanded_4 | 00007_1_0_7_4-0-1-5-6 | AOBB-K*-DH  | 3  | 14.08     | 13.80   | 13.80   | 14.08 | 15.60     | 204.06    |
| Expanded_4 | 00007_1_0_7_4-1-2-3-5 | AOBB-K*-UFO | 3  | 14.89     | 3435.06 | timeout | 14.08 | 14.54     | 278.08    |
| Expanded_4 | 00007_1_0_7_4-1-2-3-5 | AOBB-K*-DH  | 3  | 14.49     | 3559.81 | timeout | 14.08 | 14.54     | 278.08    |
| Expanded_4 | 00007_1_0_7_4-1-2-3-5 | AOBB-K*     | 3  | 14.49     | 3297.98 | timeout | 14.08 | 14.54     | 278.08    |
| Expanded_4 | 00013_3_0_4_4-0-1-2-3 | AOBB-K*-UFO | 3  | 15.03     | 12.67   | 1986.79 | 13.25 | 15.03     | 46.46     |
| Expanded_4 | 00013_3_0_4_4-0-1-2-3 | AOBB-K*-DH  | 3  | 15.03     | 21.75   | 77.60   | 13.25 | 15.03     | 46.46     |
| Expanded_4 | 00013_3_0_4_4-0-1-2-3 | AOBB-K*     | 4  | 15.03     | 162.67  | timeout | 13.25 | 15.03     | 46.46     |
| Expanded_4 | 00017_2_0_4_4-0-1-2-3 | AOBB-K*-UFO | 3  | 10.86     | 29.37   | timeout | 10.52 | 10.80     | 89.94     |
| Expanded_4 | 00017_2_0_4_4-0-1-2-3 | AOBB-K*-DH  | 3  | 10.86     | 748.16  | timeout | 10.52 | 10.80     | 89.94     |
| Expanded_4 | 00017_2_0_4_4-0-1-2-3 | AOBB-K*     | 4  | 10.82     | 2208.64 | timeout | 10.52 | 10.80     | 89.94     |
| Expanded_4 | 00018_2_0_6_4-0-1-2-4 | AOBB-K*-UFO | 3  | 17.02     | 2392.66 | timeout | 15.79 | 16.58     | 610.41    |
| Expanded_4 | 00018_2_0_6_4-0-1-2-4 | AOBB-K*-DH  | 3  | 16.60     | 1614.52 | timeout | 15.79 | 16.58     | 610.41    |
| Expanded_4 | 00018_2_0_6_4-0-1-2-4 | AOBB-K*     | 3  | 16.58     | 40.88   | timeout | 15.79 | 16.58     | 610.41    |
| Expanded_4 | 00018_2_0_6_4-0-1-2-5 | AOBB-K*-UFO | 3  | 16.58     | 14.32   | 144.44  | 15.79 | 16.58     | 581.77    |
| Expanded_4 | 00018_2_0_6_4-0-1-2-5 | AOBB-K*     | 3  | 16.58     | 36.79   | 3488.56 | 15.79 | 16.58     | 581.77    |
| Expanded_4 | 00018_2_0_6_4-0-1-2-5 | AOBB-K*-DH  | 3  | 16.58     | 39.97   | 598.38  | 15.79 | 16.58     | 581.77    |
| Expanded_4 | 00021_4_4-0-1-2-3_1_0 | AOBB-K*-UFO | 3  | 11.92     | 195.90  | timeout | 9.37  | 11.72     | 687.66    |
| Expanded_4 | 00021_4_4-0-1-2-3_1_0 | AOBB-K*-DH  | 3  | 11.92     | 623.32  | timeout | 9.37  | 11.72     | 687.66    |
| Expanded_4 | 00021_4_4-0-1-2-3_1_0 | AOBB-K*     | 4  | 11.72     | 262.83  | timeout | 9.37  | 11.72     | 687.66    |
| Expanded_4 | 00024_4_4-0-1-2-3_3_0 | AOBB-K*-UFO | 3  | 12.96     | 38.99   | 43.15   | 11.79 | 12.93     | 128.99    |
| Expanded_4 | 00024_4_4-0-1-2-3_3_0 | AOBB-K*     | 3  | 12.96     | 101.94  | 487.66  | 11.79 | 12.93     | 128.99    |
| Expanded_4 | 00024_4_4-0-1-2-3_3_0 | AOBB-K*-DH  | 3  | 12.96     | 134.86  | 407.78  | 11.79 | 12.93     | 128.99    |
| Expanded_4 | 00027_6_4-0-2-3-5_1_0 | AOBB-K*-UFO | 3  | 15.55     | 25.60   | 50.01   | 15.48 | 15.55     | 476.84    |
| Expanded_4 | 00027_6_4-0-2-3-5_1_0 | AOBB-K*     | 3  | 15.55     | 78.57   | 254.67  | 15.48 | 15.55     | 476.84    |
| Expanded_4 | 00027_6_4-0-2-3-5_1_0 | AOBB-K*-DH  | 3  | 15.55     | 181.79  | 405.89  | 15.48 | 15.55     | 476.84    |
| Expanded_4 | 00028_1_0_6_4-0-1-2-3 | AOBB-K*-UFO | 3  | 15.27     | 16.24   | 16.80   | 15.27 | 15.27     | 92.03     |
| Expanded_4 | 00028_1_0_6_4-0-1-2-3 | AOBB-K*     | 3  | 15.27     | 17.15   | 21.62   | 15.27 | 15.27     | 92.03     |
| Expanded_4 | 00028_1_0_6_4-0-1-2-3 | AOBB-K*-DH  | 3  | 15.27     | 24.72   | 37.78   | 15.27 | 15.27     | 92.03     |
| Expanded_4 | 00028_1_0_6_4-0-2-3-5 | AOBB-K*-UFO | 3  | 15.27     | 15.45   | 50.15   | 15.27 | 15.27     | 95.25     |
| Expanded_4 | 00028_1_0_6_4-0-2-3-5 | AOBB-K*     | 3  | 15.27     | 16.03   | 323.45  | 15.27 | 15.27     | 95.25     |
| Expanded_4 | 00028_1_0_6_4-0-2-3-5 | AOBB-K*-DH  | 3  | 15.27     | 23.95   | 576.98  | 15.27 | 15.27     | 95.25     |
| Expanded_4 | 00030_4_4-0-1-2-3_2_0 | AOBB-K*-UFO | 3  | 11.12     | 17.98   | 907.70  | 10.35 | 10.97     | 253.55    |
| Expanded_4 | 00030_4_4-0-1-2-3_2_0 | AOBB-K*     | 3  | 11.12     | 256.36  | timeout | 10.35 | 10.97     | 253.55    |
| Expanded_4 | 00030_4_4-0-1-2-3_2_0 | AOBB-K*-DH  | 3  | 11.12     | 290.73  | timeout | 10.35 | 10.97     | 253.55    |
| Expanded_4 | 00042_3_0_7_4-0-1-2-5 | AOBB-K*-UFO | 3  | 22.65     | 13.09   | 30.84   | 22.65 | 22.65     | 1015.99   |
| Expanded_4 | 00042_3_0_7_4-0-1-2-5 | AOBB-K*     | 3  | 22.65     | 90.14   | 3025.80 | 22.65 | 22.65     | 1015.99   |
| Expanded_4 | 00042_3_0_7_4-0-1-2-5 | AOBB-K*-DH  | 3  | 22.65     | 97.53   | 2897.35 | 22.65 | 22.65     | 1015.99   |
| Expanded_4 | 00043_5_4-0-1-3-4_2_0 | AOBB-K*-DH  | 3  | 18.19     | 386.02  | timeout | 18.04 | 18.18     | 119.88    |
| Expanded_4 | 00043_5_4-0-1-3-4_2_0 | AOBB-K*-UFO | 3  | 18.18     | 15.47   | 116.82  | 18.04 | 18.18     | 119.88    |
| Expanded_4 | 00043_5_4-0-1-3-4_2_0 | AOBB-K*     | 3  | 18.18     | 38.01   | 2824.46 | 18.04 | 18.18     | 119.88    |
| Expanded_4 | 00043_5_4-0-2-3-4_2_0 | AOBB-K*-UFO | 3  | 18.04     | 15.08   | 16.18   | 18.04 | 18.04     | 59.80     |
| Expanded_4 | 00043_5_4-0-2-3-4_2_0 | AOBB-K*     | 3  | 18.04     | 19.00   | 112.50  | 18.04 | 18.04     | 59.80     |
| Expanded_4 | 00043_5_4-0-2-3-4_2_0 | AOBB-K*-DH  | 3  | 18.04     | 22.44   | 483.55  | 18.04 | 18.04     | 59.80     |
| Expanded_4 | 00044_5_4-0-1-3-4_2_0 | AOBB-K*-UFO | 3  | 18.19     | 14.82   | 195.81  | 18.19 | 18.19     | 67.98     |
| Expanded_4 | 00044_5_4-0-1-3-4_2_0 | AOBB-K*     | 3  | 18.19     | 20.79   | 3088.35 | 18.19 | 18.19     | 67.98     |
| Expanded_4 | 00044_5_4-0-1-3-4_2_0 | AOBB-K*-DH  | 3  | 18.19     | 27.71   | timeout | 18.19 | 18.19     | 67.98     |
| Expanded_4 | 00047_2_0_6_4-0-1-2-3 | AOBB-K*-UFO | 3  | 23.08     | 201.11  | timeout | 22.70 | 23.05     | 1597.58   |
| Expanded_4 | 00047_2_0_6_4-0-1-2-3 | AOBB-K*     | 3  | 22.74     | 161.44  | timeout | 22.70 | 23.05     | 1597.58   |
| Expanded_4 | 00047_2_0_6_4-0-1-2-3 | AOBB-K*-DH  | 3  | 22.74     | 168.18  | timeout | 22.70 | 23.05     | 1597.58   |
| Expanded_4 | 00047_2_0_6_4-0-1-2-5 | AOBB-K*-UFO | 3  | 22.87     | 73.22   | 243.71  | 22.70 | 22.83     | 1339.15   |
| Expanded_4 | 00047_2_0_6_4-0-1-2-5 | AOBB-K*     | 3  | 22.74     | 133.49  | timeout | 22.70 | 22.83     | 1339.15   |
| Expanded_4 | 00047_2_0_6_4-0-1-2-5 | AOBB-K*-DH  | 3  | 22.74     | 138.90  | timeout | 22.70 | 22.83     | 1339.15   |
