# Supplementary material
Source: ML conference proceedings conference paper supplement (https://openreview.net/forum?id=FrtkfqD4bCc-)
Supplement: supplementary_material [file attachment]

|        |                   |      |    |    |             |              |         |         |
|--------|-------------------|------|----|----|-------------|--------------|---------|---------|
| tuning | Promedas_71       | 0.01 | 24 | 38 | 0.0003      | -6.186619228 | 15.23   | 15.26   |
| tuning | ProteinFolding_11 | 0.01 | 25 | 27 | 2.1476E-07  | 1961.84532   | 13.09   | 13.09   |
| tuning | ProteinFolding_11 | 0.1  | 25 | 27 | 2.1476E-06  | 1957.644649  | 13.17   | 13.17   |
| tuning | ProteinFolding_11 | 0.5  | 25 | 27 | 0.000010738 | 1947.595952  | 13.2    | 13.21   |
| tuning | ProteinFolding_11 | 1    | 25 | 27 | 0.000021476 | 1924.721183  | 13.17   | 13.17   |
| tuning | ProteinFolding_12 | 0.01 | 4  | 20 | 4.75E-12    | -1547.125248 | 78.48   | 81.37   |
| tuning | ProteinFolding_12 | 0.5  | 4  | 20 | 2.375E-10   | -1547.125248 | 78.95   | 81.84   |
| tuning | ProteinFolding_12 | 1    | 4  | 20 | 4.75E-10    | -1547.125248 | 78.97   | 81.87   |
| tuning | ProteinFolding_12 | 0.1  | 4  | 20 | 4.75E-11    | -1547.125248 | 78.99   | 81.9    |
| tuning | ProteinFolding_13 | 0.1  | 4  | 21 | 9.53574E-06 | -143.3217616 | 22.63   | 22.65   |
| tuning | ProteinFolding_13 | 0.5  | 4  | 21 | 4.76787E-05 | -143.3217616 | 22.64   | 22.66   |
| tuning | ProteinFolding_13 | 1    | 4  | 21 | 9.53574E-05 | -143.3217616 | 22.68   | 22.7    |
| tuning | ProteinFolding_13 | 0.01 | 4  | 21 | 9.53574E-07 | -143.3217616 | 23.05   | 23.09   |
| tuning | ProteinFolding_14 | 0.01 | 4  | 20 | 9.99929E-07 | -331.7347758 | 11.87   | 11.89   |
| tuning | ProteinFolding_14 | 1    | 4  | 20 | 9.99743E-05 | -331.7347758 | 12.37   | 12.39   |
| tuning | ProteinFolding_14 | 0.1  | 4  | 20 | 9.99743E-06 | -331.7347758 | 12.61   | 12.62   |
| tuning | ProteinFolding_14 | 0.5  | 4  | 20 | 4.99872E-05 | -331.7347758 | 12.61   | 12.63   |
| tuning | ProteinFolding_15 | 1    | 5  | 22 | 0.0001      | -51.55163983 | 216.55  | 216.56  |
| tuning | ProteinFolding_15 | 0.01 | 5  | 22 | 0.000001    | -51.55163983 | 217.18  | 217.18  |
| tuning | ProteinFolding_15 | 0.1  | 5  | 22 | 0.00001     | -51.55163983 | 217.64  | 217.65  |
| tuning | ProteinFolding_15 | 0.5  | 5  | 22 | 0.00005     | -51.55163983 | 218.04  | 218.04  |
| tuning | ProteinFolding_16 | 0.1  | 4  | 18 | 1.22607E-11 | -855.521914  | 29.47   | 30.12   |
| tuning | ProteinFolding_16 | 0.01 | 4  | 18 | 1.22607E-12 | -855.521914  | 29.48   | 30.14   |
| tuning | ProteinFolding_16 | 0.5  | 4  | 18 | 6.13035E-11 | -855.521914  | 29.5    | 30.16   |
| tuning | ProteinFolding_16 | 1    | 4  | 18 | 1.22607E-10 | -855.521914  | 29.78   | 30.44   |
| tuning | ProteinFolding_17 | 0.1  | 5  | 59 | 9.5019E-102 | 10422.40965  | 1896.36 | 3626.51 |
| tuning | ProteinFolding_17 | 0.5  | 5  | 59 | 4.751E-101  | 10422.40965  | 1917.2  | 3626.64 |
| tuning | ProteinFolding_17 | 0.01 | 5  | 59 | 9.5019E-103 | 10422.40965  | 1919.65 | 3626.51 |
| tuning | ProteinFolding_17 | 1    | 5  | 59 | 9.5019E-101 | 10422.40965  | 1931.62 | 3626.69 |
| tuning | ProteinFolding_18 | 0.5  | 5  | 59 | 4.751E-101  | 10971.97482  | 2215.06 | 3692.77 |
| tuning | ProteinFolding_18 | 1    | 5  | 59 | 9.5019E-101 | 10971.97482  | 2222.06 | 3692.22 |
| tuning | ProteinFolding_18 | 0.01 | 5  | 59 | 9.5019E-103 | 10971.97482  | 2234.9  | 3692.55 |
| tuning | ProteinFolding_19 | 0.1  | 6  | 59 | 9.7119E-102 | 1828.358135  | 33.52   | 3626.91 |
| tuning | ProteinFolding_19 | 0.5  | 6  | 59 | 4.8559E-101 | 1828.358135  | 33.95   | 3627.14 |
| tuning | ProteinFolding_19 | 0.01 | 6  | 59 | 9.7119E-103 | 1828.358135  | 33.97   | 3627.15 |
| tuning | ProteinFolding_19 | 1    | 6  | 59 | 9.7119E-101 | 1828.358135  | 34      | 3627.16 |
| tuning | ProteinFolding_20 | 0.01 | 5  | 59 | 9.5304E-103 | 4057.038405  | 309.22  | 3626.32 |
| tuning | ProteinFolding_20 | 1    | 5  | 59 | 9.5304E-101 | 4057.038405  | 311.26  | 3626.64 |
| tuning | ProteinFolding_20 | 0.5  | 5  | 59 | 4.7652E-101 | 4057.038405  | 314.16  | 3626.65 |
| tuning | ProteinFolding_20 | 0.1  | 5  | 59 | 9.5304E-102 | 4057.038405  | 316.23  | 3626.78 |
| tuning | ProteinFolding_21 | 0.01 | 5  | 59 | 9.5304E-103 | 6774.183133  | 554.76  | 3692.23 |
| tuning | ProteinFolding_21 | 0.1  | 5  | 59 | 9.5304E-102 | 6774.183133  | 555.07  | 3692.19 |
| tuning | ProteinFolding_21 | 0.5  | 5  | 59 | 4.7652E-101 | 6774.183133  | 556.31  | 3692.1  |
| tuning | ProteinFolding_21 | 1    | 5  | 59 | 9.5304E-101 | 6774.183133  | 557.11  | 3692.23 |
| tuning | ProteinFolding_22 | 0.01 | 5  | 59 | 9.519E-103  | 9746.544746  | 96.05   | 3692.37 |
| tuning | ProteinFolding_22 | 0.5  | 5  | 59 | 4.7595E-101 | 9746.544746  | 96.73   | 3693.04 |
| tuning | ProteinFolding_22 | 1    | 5  | 59 | 9.519E-101  | 9746.544746  | 96.8    | 3693.14 |
| tuning | ProteinFolding_22 | 0.1  | 5  | 59 | 9.519E-102  | 9746.544746  | 96.83   | 3693.18 |
| tuning | ProteinFolding_23 | 1    | 6  | 59 | 9.5295E-101 | 1854.492419  | 542.59  | 3627.12 |
| tuning | ProteinFolding_23 | 0.01 | 6  | 59 | 9.5295E-103 | 1854.492419  | 544.25  | 3627.25 |
| tuning | ProteinFolding_23 | 0.1  | 6  | 59 | 9.5295E-102 | 1854.492419  | 544.67  | 3627.26 |
| tuning | ProteinFolding_23 | 0.5  | 6  | 59 | 4.7647E-101 | 1854.492419  | 563.87  | 3627.17 |
| tuning | ProteinFolding_24 | 1    | 5  | 59 | 9.5295E-101 | 2517.508631  | 859.93  | 3626.56 |
| tuning | ProteinFolding_24 | 0.1  | 5  | 59 | 9.5295E-102 | 2517.508631  | 866.02  | 3626.38 |
