# Supplementary material
Source: ML conference proceedings conference paper supplement (https://openreview.net/forum?id=FrtkfqD4bCc-)
Supplement: supplementary_material [file attachment]

|        |             |      |    |    |           |              |       |       |
|--------|-------------|------|----|----|-----------|--------------|-------|-------|
| tuning | Promedas_44 | 1    | 23 | 56 | 0.03      | -15.27959963 | 13.72 | 13.72 |
| tuning | Promedas_44 | 0.5  | 23 | 41 | 0.015     | -7.725838265 | 10.98 | 10.99 |
| tuning | Promedas_45 | 1    | 23 | 41 | 0.03      | -7.725838265 | 11.06 | 11.06 |
| tuning | Promedas_45 | 0.1  | 23 | 41 | 0.003     | -7.725838265 | 11.08 | 11.08 |
| tuning | Promedas_45 | 0.01 | 23 | 41 | 0.0003    | -7.725838265 | 12.81 | 12.87 |
| tuning | Promedas_46 | 0.1  | 24 | 43 | 0.00002   | -12.80198659 | 23.88 | 34.01 |
| tuning | Promedas_46 | 0.01 | 24 | 43 | 0.000002  | -12.80198659 | 26.49 | 38.72 |
| tuning | Promedas_46 | 1    | 24 | 43 | 0.0002    | -13.04091222 | 16.85 | 17.36 |
| tuning | Promedas_46 | 0.5  | 24 | 43 | 0.0001    | -13.04091222 | 27.04 | 28.45 |
| tuning | Promedas_47 | 0.5  | 23 | 49 | 0.015     | -14.01380896 | 12.51 | 12.51 |
| tuning | Promedas_47 | 0.1  | 23 | 49 | 0.003     | -14.01380896 | 12.52 | 12.53 |
| tuning | Promedas_47 | 0.01 | 23 | 49 | 0.0003    | -14.01380896 | 18.21 | 18.45 |
| tuning | Promedas_47 | 1    | 23 | 49 | 0.03      | -21.36225777 | 12.43 | 12.43 |
| tuning | Promedas_48 | 0.01 | 23 | 66 | 0.0000236 | -10.77858392 | 22.68 | 27.94 |
| tuning | Promedas_48 | 1    | 23 | 66 | 0.00236   | -11.00165909 | 14.74 | 14.77 |
| tuning | Promedas_48 | 0.5  | 23 | 66 | 0.00118   | -11.00165909 | 14.85 | 14.94 |
| tuning | Promedas_48 | 0.1  | 23 | 66 | 0.000236  | -11.00165909 | 15.48 | 16.29 |
| tuning | Promedas_49 | 0.01 | 23 | 42 | 0.0003    | -8.372279582 | 12.54 | 13.61 |
| tuning | Promedas_49 | 0.1  | 23 | 42 | 0.003     | -11.39005571 | 11.1  | 11.11 |
| tuning | Promedas_49 | 1    | 23 | 42 | 0.03      | -12.21657807 | 10.96 | 10.96 |
| tuning | Promedas_49 | 0.5  | 23 | 42 | 0.015     | -12.21657807 | 11.1  | 11.1  |
| tuning | Promedas_50 | 0.1  | 23 | 49 | 0.003     | -9.167521815 | 10.22 | 10.22 |
| tuning | Promedas_50 | 0.5  | 23 | 49 | 0.015     | -9.167521815 | 10.24 | 10.24 |
| tuning | Promedas_50 | 1    | 23 | 49 | 0.03      | -9.167521815 | 10.25 | 10.25 |
| tuning | Promedas_50 | 0.01 | 23 | 49 | 0.0003    | -9.167521815 | 11.32 | 13.22 |
| tuning | Promedas_51 | 0.01 | 24 | 35 | 0.0003    | -12.29445393 | 11.57 | 11.74 |
| tuning | Promedas_51 | 0.1  | 24 | 35 | 0.003     | -12.91664581 | 11.24 | 11.24 |
| tuning | Promedas_51 | 1    | 24 | 35 | 0.03      | -15.26168211 | 11.29 | 11.3  |
| tuning | Promedas_51 | 0.5  | 24 | 35 | 0.015     | -15.26168211 | 11.3  | 11.3  |
| tuning | Promedas_52 | 1    | 23 | 44 | 0.0002    | -10.78424056 | 15.26 | 15.38 |
| tuning | Promedas_52 | 0.5  | 23 | 44 | 0.0001    | -10.78424056 | 22.05 | 22.31 |
| tuning | Promedas_52 | 0.1  | 23 | 44 | 0.00002   | -10.78424056 | 27.05 | 27.38 |
| tuning | Promedas_52 | 0.01 | 23 | 44 | 0.000002  | -10.78424056 | 27.9  | 28.24 |
| tuning | Promedas_53 | 0.5  | 23 | 56 | 0.015     | -9.257968661 | 11.63 | 11.63 |
| tuning | Promedas_53 | 0.1  | 23 | 56 | 0.003     | -9.257968661 | 11.7  | 11.72 |
| tuning | Promedas_53 | 1    | 23 | 56 | 0.03      | -9.257968661 | 11.72 | 11.72 |
| tuning | Promedas_53 | 0.01 | 23 | 56 | 0.0003    | -9.257968661 | 17.15 | 18.56 |
| tuning | Promedas_54 | 1    | 23 | 52 | 0.0002    | -10.3242536  | 14.01 | 14.57 |
| tuning | Promedas_54 | 0.5  | 23 | 52 | 0.0001    | -10.3242536  | 21.67 | 22.71 |
| tuning | Promedas_54 | 0.1  | 23 | 52 | 0.00002   | -10.3242536  | 30.33 | 31.8  |
| tuning | Promedas_54 | 0.01 | 23 | 52 | 0.000002  | -10.3242536  | 32.17 | 33.76 |
| tuning | Promedas_55 | 1    | 23 | 46 | 0.0002    | -12.7154387  | 8.38  | 9.1   |
| tuning | Promedas_55 | 0.5  | 23 | 46 | 0.0001    | -12.7154387  | 13.01 | 17.94 |
| tuning | Promedas_55 | 0.1  | 23 | 46 | 0.00002   | -12.7154387  | 14.71 | 20.73 |
| tuning | Promedas_55 | 0.01 | 23 | 46 | 0.000002  | -12.7154387  | 15.82 | 22.41 |
| tuning | Promedas_56 | 0.01 | 23 | 44 | 0.0003    | -11.34587303 | 11.62 | 12.28 |
| tuning | Promedas_56 | 0.1  | 23 | 44 | 0.003     | -13.13391815 | 9.04  | 9.04  |
| tuning | Promedas_56 | 0.5  | 23 | 44 | 0.015     | -15.2614705  | 9.09  | 9.09  |
| tuning | Promedas_56 | 1    | 23 | 44 | 0.03      | -15.2614705  | 9.1   | 9.1   |
| tuning | Promedas_57 | 0.01 | 23 | 49 | 0.0003    | -10.4321622  | 9.84  | 10.04 |
| tuning | Promedas_57 | 0.5  | 23 | 49 | 0.015     | -10.77108953 | 9.31  | 9.31  |
| tuning | Promedas_57 | 0.1  | 23 | 49 | 0.003     | -10.77108953 | 9.33  | 9.33  |
| tuning | Promedas_57 | 1    | 23 | 49 | 0.03      | -10.77108953 | 9.34  | 9.34  |
| tuning | Promedas_58 | 0.01 | 24 | 55 | 0.0003    | -19.94660364 | 16.15 | 17.16 |
