# Supplementary material
Source: ML conference proceedings conference paper supplement (https://openreview.net/forum?id=FrtkfqD4bCc-)
Supplement: supplementary_material [file attachment]

|       |                    |      |    |     |             |              |         |         |
|-------|--------------------|------|----|-----|-------------|--------------|---------|---------|
| final | BN-nd-500-5-10     | 0.5  | 8  | 155 | 0.0624995   | -142.4410719 | 22.75   | 3620.95 |
| final | BN-nd-500-5-10     | 0.01 | 8  | 155 | 0.00124999  | -143.9152665 | 22.08   | 3620.83 |
| final | driverlog04ac.wcsp | 0.01 | 7  | 56  | 0.00943357  | -0.151099481 | 127.16  | 261.05  |
| final | driverlog04ac.wcsp | 0.5  | 7  | 56  | 0.471678    | -0.151099481 | 127.25  | 260.49  |
| final | driverlog04ac.wcsp | 1    | 7  | 56  | 0.943357    | -0.151099481 | 127.49  | 261.13  |
| final | driverlog04ac.wcsp | 0.1  | 7  | 56  | 0.0943357   | -0.151099481 | 127.7   | 261.37  |
| final | driverlog05ac.wcsp | 1    | 7  | 68  | 0.972499    | -0.081748819 | 68.1    | 109.03  |
| final | driverlog05ac.wcsp | 0.5  | 7  | 68  | 0.486249    | -0.081748819 | 136.93  | 544.34  |
| final | driverlog05ac.wcsp | 0.01 | 7  | 68  | 0.00972499  | -0.081748819 | 136.94  | 544.56  |
| final | driverlog05ac.wcsp | 0.1  | 7  | 68  | 0.0972499   | -0.081748819 | 137.41  | 546.61  |
| final | driverlog08ac.wcsp | 0.01 | 7  | 90  | 0.00967438  | -0.127666916 | 107.39  | 304.91  |
| final | driverlog08ac.wcsp | 0.1  | 7  | 90  | 0.0967438   | -0.127666916 | 107.42  | 305.26  |
| final | driverlog08ac.wcsp | 0.5  | 7  | 90  | 0.483719    | -0.127666916 | 107.47  | 304.48  |
| final | driverlog08ac.wcsp | 1    | 7  | 90  | 0.967438    | -0.147794583 | 104.93  | 108.32  |
| final | grid20x20.f10      | 0.1  | 25 | 27  | 0.000077262 | 1309.721293  | 13.11   | 13.11   |
| final | grid20x20.f10      | 0.01 | 25 | 27  | 7.7262E-06  | 1309.721293  | 13.25   | 13.25   |
| final | grid20x20.f10      | 0.5  | 25 | 27  | 0.00038631  | 1302.485739  | 13.06   | 13.06   |
| final | grid20x20.f10      | 1    | 25 | 27  | 0.00077262  | 1285.539227  | 13.03   | 13.04   |
| final | grid20x20.f10.wrap | 0.5  | 24 | 49  | 0.000107565 | 1325.038005  | 16.4    | 16.41   |
| final | grid20x20.f10.wrap | 0.1  | 24 | 49  | 0.000021513 | 1325.038005  | 20.01   | 20.12   |
| final | grid20x20.f10.wrap | 0.01 | 24 | 49  | 2.1513E-06  | 1325.038005  | 20.17   | 20.3    |
| final | grid20x20.f10.wrap | 1    | 24 | 49  | 0.00021513  | 1319.4433    | 17.17   | 17.2    |
| final | grid20x20.f15      | 0.01 | 25 | 27  | 2.1476E-07  | 1961.84532   | 13.04   | 13.05   |
| final | grid20x20.f15      | 0.1  | 25 | 27  | 2.1476E-06  | 1957.644649  | 13.09   | 13.1    |
| final | grid20x20.f15      | 0.5  | 25 | 27  | 0.000010738 | 1947.595952  | 13.03   | 13.04   |
| final | grid20x20.f15      | 1    | 25 | 27  | 0.000021476 | 1924.721183  | 13.06   | 13.06   |
| final | grid20x20.f15.wrap | 0.1  | 24 | 49  | 3.1553E-07  | 1981.75998   | 31.28   | 31.37   |
| final | grid20x20.f15.wrap | 0.01 | 24 | 49  | 3.1553E-08  | 1981.75998   | 31.46   | 31.54   |
| final | grid20x20.f15.wrap | 0.5  | 24 | 49  | 1.57765E-06 | 1979.093792  | 17.38   | 17.45   |
| final | grid20x20.f15.wrap | 1    | 24 | 49  | 3.1553E-06  | 1973.771341  | 19.42   | 19.48   |
| final | grid20x20.f5.wrap  | 0.1  | 24 | 49  | 0.0014667   | 669.970751   | 14.45   | 15.8    |
| final | grid20x20.f5.wrap  | 0.01 | 24 | 49  | 0.00014667  | 669.970751   | 14.58   | 15.89   |
| final | grid20x20.f5.wrap  | 0.5  | 24 | 49  | 0.0073335   | 669.970751   | 14.71   | 16.08   |
| final | grid20x20.f5.wrap  | 1    | 24 | 49  | 0.014667    | 665.7480172  | 19.6    | 19.63   |
| final | grid40x40.f10      | 0.5  | 21 | 61  | 0.00018633  | 5463.693962  | 591.47  | 3611.35 |
| final | grid40x40.f10      | 1    | 21 | 61  | 0.00037266  | 5436.349526  | 1476.07 | 3611.37 |
| final | grid40x40.f15      | 1    | 21 | 61  | 7.1941E-06  | 8137.210041  | 2084.08 | 3611.38 |
| final | grid40x40.f2       | 0.1  | 21 | 61  | 0.020619    | 1166.326127  | 806.06  | 3610.68 |
| final | grid40x40.f2       | 0.5  | 21 | 61  | 0.103095    | 1166.326127  | 807.11  | 3610.66 |
| final | grid40x40.f2       | 0.01 | 21 | 61  | 0.0020619   | 1166.326127  | 815.15  | 3610.71 |
| final | grid40x40.f2.wrap  | 1    | 21 | 104 | 0.17676     | 1172.158924  | 2582.33 | 3613.99 |
| final | grid40x40.f5       | 0.01 | 21 | 61  | 0.00019304  | 2776.177825  | 991.23  | 3611.43 |
| final | grid40x40.f5       | 0.1  | 21 | 61  | 0.0019304   | 2776.177825  | 993.29  | 3611.28 |
| final | grid40x40.f5       | 0.5  | 21 | 61  | 0.009652    | 2768.861368  | 1059    | 3611.37 |
| final | grid40x40.f5       | 1    | 21 | 61  | 0.019304    | 2741.594561  | 1543.76 | 3611.38 |
| final | pedigree1          | 0.01 | 19 | 18  | 0.00135     | -45.58155502 |         | 4.61    |
| final | pedigree1          | 0.1  | 19 | 18  | 0.0135      | -45.58155502 |         | 4.69    |
| final | pedigree1          | 0.5  | 19 | 18  | 0.0675      | -45.58155502 |         | 4.69    |
| final | pedigree1          | 1    | 19 | 18  | 0.135       | -45.58155502 |         | 4.67    |
| final | pedigree13         | 1    | 21 | 44  | 0.009389    | -73.37497885 | 678.59  | 3611.94 |
| final | pedigree13         | 0.5  | 21 | 44  | 0.0046945   | -73.37497885 | 700.19  | 3611.91 |
| final | pedigree13         | 0.1  | 21 | 44  | 0.0009389   | -73.37497885 | 729.14  | 3611.93 |
| final | pedigree13         | 0.01 | 21 | 44  | 0.00009389  | -73.37497885 | 733.49  | 3611.87 |
| final | pedigree18         | 0.01 | 22 | 21  | 0.00015459  | -125.2524302 |         | 5.49    |
