# Supplementary material
Source: ML conference proceedings conference paper supplement (https://openreview.net/forum?id=FrtkfqD4bCc-)
Supplement: supplementary_material [file attachment]

|        |             |      |    |     |          |              |         |         |
|--------|-------------|------|----|-----|----------|--------------|---------|---------|
| tuning | Promedas_17 | 0.01 | 22 | 87  | 0.000002 | -23.74224229 | 3465.7  | 3610.96 |
| tuning | Promedas_18 | 1    | 22 | 88  | 0.0002   | -28.41578549 | 2048.4  | 3611.69 |
| tuning | Promedas_18 | 0.5  | 22 | 88  | 0.0001   | -32.19315922 | 19.51   | 3611.77 |
| tuning | Promedas_18 | 0.1  | 22 | 88  | 0.00002  | -32.19315922 | 81.24   | 3611.8  |
| tuning | Promedas_18 | 0.01 | 22 | 88  | 0.000002 | -32.19315922 | 157.9   | 3611.86 |
| tuning | Promedas_19 | 1    | 21 | 135 | 0.0002   | -34.31953671 | 2612.73 | 3613.18 |
| tuning | Promedas_19 | 0.5  | 21 | 135 | 0.0001   | -36.2398347  | 29.24   | 3613.15 |
| tuning | Promedas_19 | 0.1  | 21 | 135 | 0.00002  | -36.2398347  | 1587.33 | 3612.93 |
| tuning | Promedas_19 | 0.01 | 21 | 135 | 0.000002 | -36.2398347  | 2175.52 | 3613.1  |
| tuning | Promedas_20 | 0.01 | 22 | 108 | 0.0003   | -17.79802203 | 2787.79 | 3616.69 |
| tuning | Promedas_20 | 0.1  | 22 | 108 | 0.003    | -20.95551522 | 18.47   | 18.88   |
| tuning | Promedas_20 | 0.5  | 22 | 108 | 0.015    | -24.4219772  | 16.73   | 16.73   |
| tuning | Promedas_20 | 1    | 22 | 108 | 0.03     | -24.4219772  | 16.77   | 16.77   |
| tuning | Promedas_21 | 0.01 | 22 | 82  | 0.0003   | -17.4954078  | 2950.12 | 3015.6  |
| tuning | Promedas_21 | 0.1  | 22 | 82  | 0.003    | -27.45815029 | 13.04   | 13.04   |
| tuning | Promedas_21 | 1    | 22 | 82  | 0.03     | -27.45815029 | 13.09   | 13.09   |
| tuning | Promedas_21 | 0.5  | 22 | 82  | 0.015    | -27.45815029 | 13.14   | 13.14   |
| tuning | Promedas_22 | 0.01 | 22 | 100 | 0.0003   | -16.78490012 | 3531.91 | 3615.95 |
| tuning | Promedas_22 | 0.1  | 22 | 100 | 0.003    | -18.7027544  | 16.22   | 16.56   |
| tuning | Promedas_22 | 1    | 22 | 100 | 0.03     | -21.46631511 | 15.96   | 15.96   |
| tuning | Promedas_22 | 0.5  | 22 | 100 | 0.015    | -21.46631511 | 16      | 16      |
| tuning | Promedas_23 | 0.01 | 22 | 108 | 0.0003   | -26.87444236 | 2885.24 | 3614.6  |
| tuning | Promedas_23 | 0.1  | 22 | 108 | 0.003    | -31.31343919 | 14.64   | 14.64   |
| tuning | Promedas_23 | 1    | 22 | 108 | 0.03     | -38.11834744 | 14.71   | 14.71   |
| tuning | Promedas_23 | 0.5  | 22 | 108 | 0.015    | -38.11834744 | 14.72   | 14.72   |
| tuning | Promedas_24 | 0.01 | 24 | 52  | 0.0003   | -12.54231159 | 15.85   | 26.31   |
| tuning | Promedas_24 | 0.1  | 24 | 52  | 0.003    | -14.98811261 | 15.59   | 15.61   |
| tuning | Promedas_24 | 1    | 24 | 52  | 0.03     | -15.27455207 | 15.54   | 15.54   |
| tuning | Promedas_24 | 0.5  | 24 | 52  | 0.015    | -15.27455207 | 15.62   | 15.62   |
| tuning | Promedas_25 | 1    | 22 | 77  | 0.0002   | -14.67209461 | 878.94  | 1341.88 |
| tuning | Promedas_25 | 0.5  | 22 | 77  | 0.0001   | -14.848099   | 1769.49 | 3609.82 |
| tuning | Promedas_25 | 0.1  | 22 | 77  | 0.00002  | -14.848099   | 2985.61 | 3609.75 |
| tuning | Promedas_25 | 0.01 | 22 | 77  | 0.000002 | -14.848099   | 3386.7  | 3609.85 |
| tuning | Promedas_26 | 0.01 | 22 | 92  | 0.0003   | -23.33749198 | 2620.37 | 3613.37 |
| tuning | Promedas_26 | 0.1  | 22 | 92  | 0.003    | -23.38326608 | 13.4    | 13.4    |
| tuning | Promedas_26 | 1    | 22 | 92  | 0.03     | -27.4611756  | 13.34   | 13.34   |
| tuning | Promedas_26 | 0.5  | 22 | 92  | 0.015    | -27.4611756  | 13.38   | 13.38   |
| tuning | Promedas_27 | 0.01 | 23 | 66  | 0.0003   | -10.34493809 | 183.1   | 201.57  |
| tuning | Promedas_27 | 1    | 23 | 66  | 0.03     | -15.26958767 | 13.69   | 13.69   |
| tuning | Promedas_27 | 0.1  | 23 | 66  | 0.003    | -15.26958767 | 13.73   | 13.73   |
| tuning | Promedas_27 | 0.5  | 23 | 66  | 0.015    | -15.26958767 | 13.74   | 13.74   |
| tuning | Promedas_28 | 0.01 | 23 | 43  | 0.0003   | -6.243452537 | 17.18   | 17.48   |
| tuning | Promedas_28 | 0.1  | 23 | 43  | 0.003    | -10.4204788  | 11.16   | 11.23   |
| tuning | Promedas_28 | 1    | 23 | 43  | 0.03     | -10.70691826 | 11.18   | 11.18   |
| tuning | Promedas_28 | 0.5  | 23 | 43  | 0.015    | -10.70691826 | 11.19   | 11.19   |
| tuning | Promedas_29 | 1    | 22 | 87  | 0.0002   | -20.0850497  | 3256.23 | 3611.14 |
| tuning | Promedas_29 | 0.5  | 22 | 87  | 0.0001   | -20.6047213  | 2464.82 | 3611.18 |
| tuning | Promedas_29 | 0.1  | 22 | 87  | 0.00002  | -21.63294386 | 26.33   | 3611.13 |
| tuning | Promedas_29 | 0.01 | 22 | 87  | 0.000002 | -21.63294386 | 27.62   | 3611.23 |
| tuning | Promedas_30 | 0.01 | 22 | 88  | 0.0003   | -10.43906494 | 128.88  | 131.22  |
| tuning | Promedas_30 | 0.1  | 22 | 88  | 0.003    | -18.85107053 | 13.7    | 13.73   |
| tuning | Promedas_30 | 1    | 22 | 88  | 0.03     | -24.41534195 | 13.39   | 13.39   |
| tuning | Promedas_30 | 0.5  | 22 | 88  | 0.015    | -24.41534195 | 13.47   | 13.47   |
| tuning | Promedas_31 | 0.01 | 22 | 79  | 0.0003   | -14.59266039 | 452.35  | 800.82  |
