# Supplementary material
Source: ML conference proceedings conference paper supplement (https://openreview.net/forum?id=FrtkfqD4bCc-)
Supplement: supplementary_material [file attachment]

| set    | problem            | delta | iB | w*  | t-final     | Solution (log10) | Anytime | Time elapsed |
|--------|--------------------|-------|----|-----|-------------|------------------|---------|--------------|
| tuning | Grids_25           | 1     | 21 | 63  | 0.20619     | 1187.304967      | 3241.68 | 3623.26      |
| tuning | ImageAlignment_12  | 0.1   | 5  | 29  | 0.00001     | -436.6694109     | 128.4   | 128.4        |
| tuning | ImageAlignment_12  | 1     | 5  | 29  | 0.0001      | -436.6694109     | 128.54  | 128.54       |
| tuning | ImageAlignment_12  | 0.5   | 5  | 29  | 0.00005     | -436.6694109     | 129.21  | 129.22       |
| tuning | ImageAlignment_12  | 0.01  | 5  | 29  | 0.000001    | -436.6694109     | 129.32  | 129.33       |
| tuning | ImageAlignment_13  | 0.5   | 3  | 21  | 2.375E-10   | -2998.853761     | 566.41  | 3633.36      |
| tuning | ImageAlignment_13  | 0.1   | 3  | 21  | 4.75E-11    | -2998.853761     | 566.42  | 3633.35      |
| tuning | ImageAlignment_13  | 1     | 3  | 21  | 4.75E-10    | -2998.853761     | 566.81  | 3633.53      |
| tuning | ImageAlignment_13  | 0.01  | 3  | 21  | 4.75E-12    | -2998.853761     | 567     | 3633.54      |
| tuning | ImageAlignment_14  | 0.01  | 4  | 23  | 1.22842E-12 | -1557.493793     | 1241.42 | 1242.38      |
| tuning | ImageAlignment_14  | 1     | 4  | 23  | 1.22842E-10 | -1557.493793     | 1246.1  | 1247.06      |
| tuning | ImageAlignment_14  | 0.5   | 4  | 23  | 6.14208E-11 | -1557.493793     | 1258.78 | 1259.74      |
| tuning | ImageAlignment_14  | 0.1   | 4  | 23  | 1.22842E-11 | -1557.493793     | 1270.11 | 1271.09      |
| tuning | ImageAlignment_15  | 0.01  | 4  | 23  | 4.75E-12    | -1177.469334     | 1969.47 | 1980.4       |
| tuning | ImageAlignment_15  | 0.1   | 4  | 23  | 4.75E-11    | -1177.469334     | 1971.19 | 1982.16      |
| tuning | ImageAlignment_15  | 0.5   | 4  | 23  | 2.375E-10   | -1177.469334     | 1971.98 | 1982.94      |
| tuning | ImageAlignment_15  | 1     | 4  | 23  | 4.75E-10    | -1177.469334     | 1979.27 | 1990.31      |
| tuning | ObjectDetection_11 | 0.1   | 6  | 59  | 9.5551E-102 | 2951.357728      | 1018.02 | 3633.16      |
| tuning | ObjectDetection_11 | 0.01  | 6  | 59  | 9.5551E-103 | 2951.357728      | 1029.39 | 3632.68      |
| tuning | ObjectDetection_11 | 0.5   | 6  | 59  | 4.7776E-101 | 2951.357728      | 1031.28 | 3632.99      |
| tuning | ObjectDetection_11 | 1     | 6  | 59  | 9.5551E-101 | 2951.357728      | 1045.96 | 3632.97      |
| tuning | ObjectDetection_12 | 0.01  | 5  | 59  | 9.5551E-103 | 5488.820743      | 72.03   | 3639.93      |
| tuning | ObjectDetection_12 | 0.1   | 5  | 59  | 9.5551E-102 | 5488.820743      | 72.4    | 3640.06      |
| tuning | ObjectDetection_12 | 1     | 5  | 59  | 9.5551E-101 | 5488.820743      | 72.52   | 3640.01      |
| tuning | ObjectDetection_12 | 0.5   | 5  | 59  | 4.7776E-101 | 5488.820743      | 72.72   | 3640.31      |
| tuning | ObjectDetection_13 | 1     | 5  | 59  | 9.5551E-101 | 6684.295367      | 326.32  | 3748.19      |
| tuning | ObjectDetection_13 | 0.5   | 5  | 59  | 4.7776E-101 | 6684.295367      | 328.44  | 3749.06      |
| tuning | ObjectDetection_13 | 0.01  | 5  | 59  | 9.5551E-103 | 6684.295367      | 329.35  | 3749.43      |
| tuning | ObjectDetection_13 | 0.1   | 5  | 59  | 9.5551E-102 | 6684.295367      | 330.59  | 3748.25      |
| tuning | ObjectDetection_14 | 0.1   | 6  | 59  | 9.5152E-102 | 6712.503515      | 63.69   | 3632.04      |
| tuning | ObjectDetection_14 | 1     | 6  | 59  | 9.5152E-101 | 6712.503515      | 64.17   | 3632.29      |
| tuning | ObjectDetection_14 | 0.01  | 6  | 59  | 9.5152E-103 | 6712.503515      | 64.18   | 3632.18      |
| tuning | ObjectDetection_14 | 0.5   | 6  | 59  | 4.7576E-101 | 6712.503515      | 64.53   | 3632.35      |
| tuning | ObjectDetection_15 | 0.01  | 5  | 59  | 9.5152E-103 | 10469.60491      | 73.03   | 3640.44      |
| tuning | ObjectDetection_15 | 0.1   | 5  | 59  | 9.5152E-102 | 10469.60491      | 73.1    | 3640.42      |
| tuning | ObjectDetection_15 | 0.5   | 5  | 59  | 4.7576E-101 | 10469.60491      | 73.66   | 3640.81      |
| tuning | ObjectDetection_15 | 1     | 5  | 59  | 9.5152E-101 | 10469.60491      | 73.86   | 3640.6       |
| tuning | ObjectDetection_16 | 0.5   | 5  | 59  | 4.7576E-101 | 12023.31726      | 322.95  | 3749.35      |
| tuning | ObjectDetection_16 | 0.1   | 5  | 59  | 9.5152E-102 | 12023.31726      | 324.22  | 3749.46      |
| tuning | ObjectDetection_16 | 1     | 5  | 59  | 9.5152E-101 | 12023.31726      | 325.09  | 3749.23      |
| tuning | ObjectDetection_16 | 0.01  | 5  | 59  | 9.5152E-103 | 12023.31726      | 325.79  | 3749.18      |
| tuning | ObjectDetection_17 | 0.5   | 6  | 59  | 4.759E-101  | 2457.699449      | 2952.14 | 3629.53      |
| tuning | ObjectDetection_17 | 1     | 6  | 59  | 9.5181E-101 | 2457.699449      | 2999.91 | 3629.58      |
| tuning | ObjectDetection_17 | 0.1   | 6  | 59  | 9.5181E-102 | 2457.699449      | 3069.36 | 3629.38      |
| tuning | ObjectDetection_17 | 0.01  | 6  | 59  | 9.5181E-103 | 2457.699449      | 3277.48 | 3631.67      |
| tuning | ObjectDetection_18 | 0.5   | 5  | 59  | 4.759E-101  | 7623.327296      | 71.05   | 3638.72      |
| tuning | ObjectDetection_18 | 0.01  | 5  | 59  | 9.5181E-103 | 7623.327296      | 71.07   | 3638.85      |
| tuning | ObjectDetection_18 | 1     | 5  | 59  | 9.5181E-101 | 7623.327296      | 71.14   | 3638.82      |
| tuning | ObjectDetection_18 | 0.1   | 5  | 59  | 9.5181E-102 | 7623.327296      | 72.22   | 3638.82      |
| tuning | Promedas_11        | 0.01  | 21 | 143 | 0.0003      | -23.95527591     | 2448.58 | 3615.48      |
| tuning | Promedas_11        | 0.1   | 21 | 143 | 0.003       | -24.91268326     | 16.49   | 17.57        |
| tuning | Promedas_11        | 0.5   | 21 | 143 | 0.015       | -30.52322606     | 15.53   | 15.54        |
| tuning | Promedas_11        | 1     | 21 | 143 | 0.03        | -30.52322606     | 15.58   | 15.58        |
