# Supplementary material
Source: ML conference proceedings conference paper supplement (https://openreview.net/forum?id=FrtkfqD4bCc-)
Supplement: supplementary_material [file attachment]

|       |                    |      |    |     |             |              |         |         |
|-------|--------------------|------|----|-----|-------------|--------------|---------|---------|
| final | 90-24-5.Q0.5.I2    | 0.5  | 22 | 131 | 0.253487    | -5.688864837 | 16.28   | 34.18   |
| final | 90-24-5.Q0.5.I2    | 1    | 22 | 131 | 0.506973    | -6.719556657 | 16.03   | 16.03   |
| final | 90-25-5.Q0.5.I2    | 0.5  | 22 | 174 | 0.250558    | -7.916092068 | 453.32  | 1989.73 |
| final | 90-25-5.Q0.5.I2    | 0.01 | 22 | 174 | 0.00501117  | -8.134777293 | 2843.59 | 3614.77 |
| final | 90-25-5.Q0.5.I2    | 0.1  | 22 | 174 | 0.0501117   | -8.145624102 | 2516.67 | 3614.65 |
| final | 90-25-5.Q0.5.I2    | 1    | 22 | 174 | 0.501117    | -9.126110046 | 14.76   | 14.76   |
| final | 90-26-5.Q0.5.I1    | 0.01 | 22 | 110 | 0.00510705  | -8.595848896 | 357.67  | 537.38  |
| final | 90-26-5.Q0.5.I1    | 0.1  | 22 | 110 | 0.0510705   | -8.615394337 | 295.1   | 407.38  |
| final | 90-26-5.Q0.5.I1    | 0.5  | 22 | 110 | 0.255352    | -9.001378817 | 15.59   | 26.99   |
| final | 90-26-5.Q0.5.I1    | 1    | 22 | 110 | 0.510705    | -10.62084079 | 14.49   | 14.49   |
| final | 90-30-5.Q0.5.I1    | 0.1  | 21 | 246 | 0.0515059   | -11.66523879 | 2426.16 | 3614.76 |
| final | 90-30-5.Q0.5.I1    | 0.5  | 21 | 246 | 0.25753     | -12.33549897 | 1528.67 | 3614.81 |
| final | 90-30-5.Q0.5.I1    | 1    | 21 | 246 | 0.515059    | -13.23169301 | 14.81   | 14.81   |
| final | 90-30-5.Q0.5.I1    | 0.01 | 21 | 246 | 0.00515059  | -13.89784079 | 1867.96 | 3614.84 |
| final | 90-34-5.Q0.5.I2    | 0.5  | 21 | 352 | 0.250305    | -13.67911577 | 617.26  | 3622.86 |
| final | 90-34-5.Q0.5.I2    | 1    | 21 | 352 | 0.50061     | -13.79393834 | 22.86   | 22.86   |
| final | 90-34-5.Q0.5.I2    | 0.01 | 21 | 352 | 0.0050061   | -16.11804447 | 1781.23 | 3622.96 |
| final | 90-34-5.Q0.5.I2    | 0.1  | 21 | 352 | 0.050061    | -16.13201933 | 582.81  | 3622.86 |
| final | 90-38-5.Q0.5.I4    | 0.5  | 20 | 371 | 0.251308    | -17.64927957 | 313.1   | 3628.19 |
| final | 90-38-5.Q0.5.I4    | 0.01 | 20 | 371 | 0.00502616  | -19.66099419 | 110.51  | 3628.18 |
| final | 90-38-5.Q0.5.I4    | 0.1  | 20 | 371 | 0.0502616   | -19.99487863 | 63.2    | 3628.08 |
| final | 90-38-5.Q0.5.I4    | 1    | 20 | 371 | 0.502616    | -20.48276967 | 28.34   | 28.34   |
| final | 90-42-5.Q0.5.I4    | 0.5  | 20 | 300 | 0.251719    | -18.97153117 | 2882.38 | 3630.92 |
| final | 90-42-5.Q0.5.I4    | 1    | 20 | 300 | 0.503439    | -21.59570917 | 30.92   | 30.92   |
| final | 90-46-5.Q0.5.I4    | 1    | 19 | 356 | 0.500985    | -29.35245974 | 30.07   | 30.07   |
| final | 90-50-5.Q0.5.I3    | 1    | 19 | 788 | 0.50117     | -30.07841645 | 185.14  | 185.14  |
| final | 90-50-5.Q0.5.I3    | 0.5  | 19 | 788 | 0.250585    | -30.29259367 | 3005.95 | 3784.66 |
| final | 90-50-5.Q0.5.I3    | 0.01 | 19 | 788 | 0.0050117   | -36.70177831 | 3009.21 | 3784.01 |
| final | 90-50-5.Q0.5.I3    | 0.1  | 19 | 788 | 0.050117    | -36.76082834 | 2880.95 | 3784.98 |
| final | bw_p54_10          | 0.1  | 13 | 777 | 0.0714063   | -0.999509893 | 1137.82 | 1158.53 |
| final | bw_p54_10          | 0.01 | 13 | 777 | 0.00714063  | -0.999509893 | 1143.9  | 1164.71 |
| final | bw_p54_10          | 1    | 13 | 777 | 0.714063    | -1.124448629 | 880.04  | 880.04  |
| final | bw_p54_10          | 0.5  | 13 | 777 | 0.357031    | -1.124448629 | 882.52  | 882.52  |
| final | Grids_25           | 1    | 21 | 63  | 0.20619     | 1187.304967  | 3232.92 | 3623.31 |
| final | ImageAlignment_12  | 1    | 5  | 29  | 0.0001      | -436.6694109 | 129     | 129     |
| final | ImageAlignment_12  | 0.5  | 5  | 29  | 0.00005     | -436.6694109 | 129.34  | 129.34  |
| final | ImageAlignment_12  | 0.1  | 5  | 29  | 0.00001     | -436.6694109 | 130.23  | 130.23  |
| final | ImageAlignment_12  | 0.01 | 5  | 29  | 0.000001    | -436.6694109 | 130.47  | 130.47  |
| final | ImageAlignment_13  | 1    | 3  | 21  | 4.75E-10    | -2998.853761 | 566.68  | 3633.37 |
| final | ImageAlignment_13  | 0.5  | 3  | 21  | 2.375E-10   | -2998.853761 | 566.78  | 3633.3  |
| final | ImageAlignment_13  | 0.01 | 3  | 21  | 4.75E-12    | -2998.853761 | 566.79  | 3633.47 |
| final | ImageAlignment_13  | 0.1  | 3  | 21  | 4.75E-11    | -2998.853761 | 567.51  | 3633.31 |
| final | ImageAlignment_14  | 1    | 4  | 23  | 1.22842E-10 | -1557.493793 | 1244.36 | 1245.32 |
| final | ImageAlignment_14  | 0.1  | 4  | 23  | 1.22842E-11 | -1557.493793 | 1245.27 | 1246.23 |
| final | ImageAlignment_14  | 0.5  | 4  | 23  | 6.14208E-11 | -1557.493793 | 1245.66 | 1246.61 |
| final | ImageAlignment_14  | 0.01 | 4  | 23  | 1.22842E-12 | -1557.493793 | 1259.07 | 1260.04 |
| final | ImageAlignment_15  | 1    | 4  | 23  | 4.75E-10    | -1177.469334 | 1967.72 | 1978.65 |
| final | ImageAlignment_15  | 0.5  | 4  | 23  | 2.375E-10   | -1177.469334 | 1976.83 | 1987.84 |
| final | ImageAlignment_15  | 0.1  | 4  | 23  | 4.75E-11    | -1177.469334 | 1979.51 | 1990.53 |
| final | ImageAlignment_15  | 0.01 | 4  | 23  | 4.75E-12    | -1177.469334 | 2032.93 | 2044.26 |
| final | ObjectDetection_13 | 0.5  | 5  | 59  | 4.7776E-101 | 6684.295367  | 322.21  | 3747.88 |
| final | ObjectDetection_13 | 0.1  | 5  | 59  | 9.5551E-102 | 6684.295367  | 325.36  | 3748.3  |
| final | ObjectDetection_13 | 0.01 | 5  | 59  | 9.5551E-103 | 6684.295367  | 325.57  | 3748.15 |
| final | ObjectDetection_13 | 1    | 5  | 59  | 9.5551E-101 | 6684.295367  | 326.94  | 3748.48 |
