# Supplementary material
Source: ML conference proceedings conference paper supplement (https://openreview.net/forum?id=FrtkfqD4bCc-)
Supplement: supplementary_material [file attachment]

|        |             |      |    |     |           |              |         |         |
|--------|-------------|------|----|-----|-----------|--------------|---------|---------|
| tuning | Promedas_12 | 0.01 | 22 | 93  | 0.0003    | -17.78092788 | 3003.92 | 3614.21 |
| tuning | Promedas_12 | 0.1  | 22 | 93  | 0.003     | -20.17035658 | 14.33   | 16.87   |
| tuning | Promedas_12 | 1    | 22 | 93  | 0.03      | -22.89439747 | 14.16   | 14.16   |
| tuning | Promedas_12 | 0.5  | 22 | 93  | 0.015     | -22.89439747 | 14.22   | 14.22   |
| tuning | Promedas_13 | 0.01 | 21 | 142 | 0.000002  | -40.23385468 | 180.67  | 3615.81 |
| tuning | Promedas_13 | 0.1  | 21 | 142 | 0.00002   | -40.3534125  | 152.58  | 3615.85 |
| tuning | Promedas_13 | 1    | 21 | 142 | 0.0002    | -40.44289295 | 3511.95 | 3615.87 |
| tuning | Promedas_13 | 0.5  | 21 | 142 | 0.0001    | -41.5176966  | 2523.98 | 3615.85 |
| tuning | Promedas_14 | 1    | 22 | 107 | 0.0002    | -21.98370604 | 3438.26 | 3616.45 |
| tuning | Promedas_14 | 0.5  | 22 | 107 | 0.0001    | -23.87433821 | 3230.77 | 3616.38 |
| tuning | Promedas_14 | 0.01 | 22 | 107 | 0.000002  | -24.0952221  | 2134.85 | 3616.37 |
| tuning | Promedas_14 | 0.1  | 22 | 107 | 0.00002   | -24.0953194  | 1708.01 | 3616.4  |
| tuning | Promedas_15 | 0.01 | 21 | 136 | 0.0000005 | -34.16975521 | 2404.72 | 3615.81 |
| tuning | Promedas_15 | 0.1  | 21 | 136 | 0.000005  | -34.16976477 | 2247.76 | 3615.83 |
| tuning | Promedas_15 | 0.5  | 21 | 136 | 0.000025  | -34.17001456 | 1722.74 | 3615.95 |
| tuning | Promedas_15 | 1    | 21 | 136 | 0.00005   | -34.17026819 | 1381.62 | 3615.84 |
| tuning | Promedas_16 | 0.01 | 22 | 96  | 0.0003    | -20.36547106 | 812.91  | 3614.18 |
| tuning | Promedas_16 | 0.1  | 22 | 96  | 0.003     | -28.47572781 | 14.12   | 14.48   |
| tuning | Promedas_16 | 1    | 22 | 96  | 0.03      | -30.51463061 | 13.95   | 13.95   |
| tuning | Promedas_16 | 0.5  | 22 | 96  | 0.015     | -30.51463061 | 13.99   | 13.99   |
| tuning | Promedas_17 | 1    | 22 | 80  | 0.0002    | -19.77241516 | 2701.31 | 3119    |
| tuning | Promedas_17 | 0.5  | 22 | 80  | 0.0001    | -22.30639954 | 2161.66 | 3612.61 |
| tuning | Promedas_17 | 0.01 | 22 | 80  | 0.000002  | -22.83122393 | 2095.58 | 3612.65 |
| tuning | Promedas_17 | 0.1  | 22 | 80  | 0.00002   | -22.83133978 | 1764.2  | 3612.58 |
| tuning | Promedas_18 | 0.5  | 22 | 82  | 0.0001    | -25.6814088  | 2912.98 | 3612.49 |
| tuning | Promedas_18 | 1    | 22 | 82  | 0.0002    | -27.13149185 | 1249.25 | 3612.56 |
| tuning | Promedas_18 | 0.01 | 22 | 82  | 0.000002  | -29.80367433 | 1651.7  | 3612.73 |
| tuning | Promedas_18 | 0.1  | 22 | 82  | 0.00002   | -29.80379959 | 1358.45 | 3612.57 |
| tuning | Promedas_19 | 1    | 21 | 121 | 0.0002    | -28.37259001 | 1620.52 | 3611.36 |
| tuning | Promedas_19 | 0.01 | 21 | 121 | 0.000002  | -37.29560807 | 214.89  | 3611.4  |
| tuning | Promedas_19 | 0.1  | 21 | 121 | 0.00002   | -37.2957643  | 184.7   | 3611.5  |
| tuning | Promedas_19 | 0.5  | 21 | 121 | 0.0001    | -38.02337754 | 54.91   | 3611.41 |
| tuning | Promedas_20 | 0.01 | 21 | 120 | 0.0003    | -17.94435012 | 2941.87 | 3612.35 |
| tuning | Promedas_20 | 0.1  | 21 | 120 | 0.003     | -20.9533383  | 12.98   | 13.32   |
| tuning | Promedas_20 | 0.5  | 21 | 120 | 0.015     | -24.4219772  | 12.2    | 12.2    |
| tuning | Promedas_20 | 1    | 21 | 120 | 0.03      | -24.4219772  | 12.26   | 12.26   |
| tuning | Promedas_21 | 0.01 | 22 | 84  | 0.0003    | -17.48202831 | 3349.23 | 3455.25 |
| tuning | Promedas_21 | 0.5  | 22 | 84  | 0.015     | -27.45815029 | 13.23   | 13.24   |
| tuning | Promedas_21 | 1    | 22 | 84  | 0.03      | -27.45815029 | 13.23   | 13.23   |
| tuning | Promedas_21 | 0.1  | 22 | 84  | 0.003     | -27.45815029 | 13.29   | 13.29   |
| tuning | Promedas_22 | 0.01 | 22 | 101 | 0.0003    | -17.43561915 | 3552.12 | 3615.28 |
| tuning | Promedas_22 | 0.1  | 22 | 101 | 0.003     | -18.69512454 | 15.3    | 15.57   |
| tuning | Promedas_22 | 1    | 22 | 101 | 0.03      | -21.46238487 | 15.02   | 15.02   |
| tuning | Promedas_22 | 0.5  | 22 | 101 | 0.015     | -21.46238487 | 15.24   | 15.24   |
| tuning | Promedas_23 | 0.01 | 22 | 113 | 0.0003    | -25.92101523 | 3547.27 | 3615.89 |
| tuning | Promedas_23 | 0.1  | 22 | 113 | 0.003     | -31.31343919 | 15.87   | 15.87   |
| tuning | Promedas_23 | 0.5  | 22 | 113 | 0.015     | -38.11834744 | 15.86   | 15.86   |
| tuning | Promedas_23 | 1    | 22 | 113 | 0.03      | -38.11834744 | 15.88   | 15.88   |
| tuning | Promedas_24 | 0.01 | 23 | 58  | 0.0003    | -12.51777979 | 14.04   | 17.19   |
| tuning | Promedas_24 | 0.1  | 23 | 58  | 0.003     | -14.9847758  | 9.12    | 9.13    |
| tuning | Promedas_24 | 1    | 23 | 58  | 0.03      | -15.27455207 | 8.96    | 8.96    |
| tuning | Promedas_24 | 0.5  | 23 | 58  | 0.015     | -15.27455207 | 9.02    | 9.02    |
| tuning | Promedas_26 | 0.01 | 22 | 91  | 0.0003    | -20.42206183 | 327.51  | 3612.66 |
| tuning | Promedas_26 | 0.1  | 22 | 91  | 0.003     | -23.38326608 | 12.71   | 12.71   |
