# Supplementary material
Source: ML conference proceedings conference paper supplement (https://openreview.net/forum?id=FrtkfqD4bCc-)
Supplement: supplementary_material [file attachment]

| M | Problem | Algorithm    | i | Soln  | Time    | OR  | AND  |
|---|---------|--------------|---|-------|---------|-----|------|
| 3 | d11-3-1 | AOBB-K*-b-DH | 3 | 11.85 | 24.64   | 3   | 15   |
|   |         | AOBB-K*-b    | 3 | 11.85 | 60.99   | 58  | 197  |
|   |         | AOBB-K*-b    | 4 | 11.85 | 102.18  | 3   | 5    |
|   | d12-3-1 | AOBB-K*-b-DH | 3 | 13.93 | 22.06   | 3   | 13   |
|   |         | AOBB-K*-b    | 3 | 13.93 | 20.72   | 21  | 122  |
|   |         | AOBB-K*-b    | 4 | 13.93 | 69.05   | 3   | 4    |
|   | d14-3-1 | AOBB-K*-b-DH | 3 | 14.36 | 26.95   | 3   | 16   |
|   |         | AOBB-K*-b    | 3 | 14.36 | 21.92   | 25  | 132  |
|   |         | AOBB-K*-b    | 4 | 14.36 | 70.88   | 3   | 5    |
| 4 | d30-3-1 | AOBB-K*-b-DH | 3 | 11.12 | 54.02   | 70  | 141  |
|   |         | AOBB-K*-b    | 3 | 11.12 | 2019.77 | 254 | 3666 |
|   |         | AOBB-K*-b    | 4 | 11.12 | 154.28  | 22  | 25   |
|   | d18-4-2 | AOBB-K*-b-DH | 3 | 16.58 | 598.38  | 40  | 56   |
|   |         | AOBB-K*-b    | 3 | 16.58 | 3488.56 | 279 | 1214 |
|   | d24-4-1 | AOBB-K*-b-DH | 3 | 12.96 | 407.78  | 92  | 251  |
|   |         | AOBB-K*-b    | 3 | 12.96 | 487.66  | 94  | 437  |
|   | d27-4-1 | AOBB-K*-b-DH | 3 | 15.55 | 405.89  | 57  | 137  |
|   |         | AOBB-K*-b    | 3 | 15.55 | 254.67  | 57  | 137  |
| 4 | d28-4-1 | AOBB-K*-b-DH | 3 | 15.27 | 37.78   | 9   | 12   |
|   |         | AOBB-K*-b    | 3 | 15.27 | 21.62   | 9   | 19   |
|   | d28-4-2 | AOBB-K*-b-DH | 3 | 15.27 | 576.98  | 93  | 230  |
|   |         | AOBB-K*-b    | 3 | 15.27 | 323.45  | 59  | 166  |
|   | d42-4-1 | AOBB-K*-b-DH | 3 | 22.65 | 2897.35 | 18  | 61   |
|   |         | AOBB-K*-b    | 3 | 22.65 | 3025.80 | 24  | 114  |
|   | d43-4-2 | AOBB-K*-b-DH | 3 | 18.04 | 483.55  | 346 | 476  |
|   |         | AOBB-K*-b    | 3 | 18.04 | 112.50  | 56  | 75   |
