# Supplementary material
Source: ML conference proceedings conference paper supplement (https://openreview.net/forum?id=FrtkfqD4bCc-)
Supplement: supplementary_material [file attachment]

|        |             |      |    |    |          |              |         |         |
|--------|-------------|------|----|----|----------|--------------|---------|---------|
| tuning | Promedas_26 | 0.5  | 22 | 91 | 0.015    | -27.4611756  | 12.77   | 12.77   |
| tuning | Promedas_26 | 1    | 22 | 91 | 0.03     | -27.4611756  | 13      | 13      |
| tuning | Promedas_27 | 0.01 | 23 | 75 | 0.0003   | -10.33041208 | 260.83  | 261.36  |
| tuning | Promedas_27 | 0.1  | 23 | 75 | 0.003    | -15.26710436 | 12.57   | 12.57   |
| tuning | Promedas_27 | 0.5  | 23 | 75 | 0.015    | -15.26958767 | 12.58   | 12.58   |
| tuning | Promedas_27 | 1    | 23 | 75 | 0.03     | -15.26958767 | 12.74   | 12.74   |
| tuning | Promedas_28 | 0.01 | 23 | 40 | 0.0003   | -6.234874995 | 28.96   | 29.65   |
| tuning | Promedas_28 | 0.1  | 23 | 40 | 0.003    | -10.41870856 | 11.5    | 11.56   |
| tuning | Promedas_28 | 1    | 23 | 40 | 0.03     | -10.70691826 | 11.48   | 11.48   |
| tuning | Promedas_28 | 0.5  | 23 | 40 | 0.015    | -10.70691826 | 11.53   | 11.53   |
| tuning | Promedas_29 | 0.01 | 22 | 85 | 0.000002 | -24.18890473 | 48.27   | 3611.72 |
| tuning | Promedas_29 | 0.1  | 22 | 85 | 0.00002  | -24.18898911 | 45.72   | 3611.7  |
| tuning | Promedas_29 | 1    | 22 | 85 | 0.0002   | -24.64889153 | 834.77  | 3611.73 |
| tuning | Promedas_29 | 0.5  | 22 | 85 | 0.0001   | -24.76549283 | 86.41   | 3611.66 |
| tuning | Promedas_30 | 0.01 | 22 | 86 | 0.0003   | -10.42248187 | 23.88   | 85.86   |
| tuning | Promedas_30 | 0.1  | 22 | 86 | 0.003    | -18.84871756 | 11.6    | 11.73   |
| tuning | Promedas_30 | 0.5  | 22 | 86 | 0.015    | -24.41534195 | 11.31   | 11.31   |
| tuning | Promedas_30 | 1    | 22 | 86 | 0.03     | -24.41534195 | 11.52   | 11.52   |
| tuning | Promedas_31 | 0.01 | 22 | 93 | 0.0003   | -14.58395383 | 359.16  | 865.78  |
| tuning | Promedas_31 | 0.1  | 22 | 93 | 0.003    | -21.35301736 | 11.67   | 11.67   |
| tuning | Promedas_31 | 1    | 22 | 93 | 0.03     | -21.35301736 | 11.67   | 11.67   |
| tuning | Promedas_31 | 0.5  | 22 | 93 | 0.015    | -21.35301736 | 11.73   | 11.73   |
| tuning | Promedas_32 | 0.01 | 22 | 81 | 0.0003   | -15.20977997 | 2599.96 | 3611.67 |
| tuning | Promedas_32 | 0.1  | 22 | 81 | 0.003    | -20.36794946 | 11.87   | 12.16   |
| tuning | Promedas_32 | 0.5  | 22 | 81 | 0.015    | -24.41370695 | 11.59   | 11.59   |
| tuning | Promedas_32 | 1    | 22 | 81 | 0.03     | -24.41370695 | 11.59   | 11.59   |
| tuning | Promedas_33 | 0.01 | 24 | 55 | 0.0003   | -15.79973727 | 55.68   | 74.99   |
| tuning | Promedas_33 | 0.1  | 24 | 55 | 0.003    | -21.35244535 | 14.43   | 14.43   |
| tuning | Promedas_33 | 1    | 24 | 55 | 0.03     | -21.35309957 | 14.35   | 14.35   |
| tuning | Promedas_33 | 0.5  | 24 | 55 | 0.015    | -21.35309957 | 14.39   | 14.39   |
| tuning | Promedas_34 | 1    | 22 | 77 | 0.0002   | -17.00868483 | 1779.26 | 1830.79 |
| tuning | Promedas_34 | 0.5  | 22 | 77 | 0.0001   | -19.7880142  | 2720.25 | 3611.39 |
| tuning | Promedas_34 | 0.01 | 22 | 77 | 0.000002 | -21.64831959 | 1296.65 | 3611.34 |
| tuning | Promedas_34 | 0.1  | 22 | 77 | 0.00002  | -21.64840804 | 1112.51 | 3611.39 |
| tuning | Promedas_35 | 0.01 | 23 | 52 | 0.000002 | -11.23473454 | 2680.77 | 2680.77 |
| tuning | Promedas_35 | 0.1  | 23 | 52 | 0.00002  | -11.23479829 | 2493.86 | 2493.86 |
| tuning | Promedas_35 | 0.5  | 23 | 52 | 0.0001   | -11.23541178 | 1280.41 | 1280.41 |
| tuning | Promedas_35 | 1    | 23 | 52 | 0.0002   | -11.23752696 | 321.71  | 321.71  |
| tuning | Promedas_36 | 0.01 | 22 | 69 | 0.0003   | -8.166455545 | 267.63  | 311.51  |
| tuning | Promedas_36 | 0.1  | 22 | 69 | 0.003    | -12.53342523 | 9.78    | 9.86    |
| tuning | Promedas_36 | 0.5  | 22 | 69 | 0.015    | -15.26878527 | 9.63    | 9.63    |
| tuning | Promedas_36 | 1    | 22 | 69 | 0.03     | -15.26878527 | 9.65    | 9.65    |
| tuning | Promedas_37 | 0.01 | 22 | 73 | 0.0003   | -15.40933598 | 69.42   | 111.09  |
| tuning | Promedas_37 | 0.5  | 22 | 73 | 0.015    | -24.4015216  | 10.91   | 10.91   |
| tuning | Promedas_37 | 0.1  | 22 | 73 | 0.003    | -24.4015216  | 10.94   | 10.94   |
| tuning | Promedas_37 | 1    | 22 | 73 | 0.03     | -24.4015216  | 11.01   | 11.01   |
| tuning | Promedas_38 | 0.01 | 23 | 53 | 0.0003   | -12.14667076 | 32.38   | 33.71   |
| tuning | Promedas_38 | 0.1  | 23 | 53 | 0.003    | -16.78417794 | 10.22   | 10.22   |
| tuning | Promedas_38 | 1    | 23 | 53 | 0.03     | -16.78691875 | 10.25   | 10.25   |
| tuning | Promedas_38 | 0.5  | 23 | 53 | 0.015    | -16.78691875 | 10.26   | 10.26   |
| tuning | Promedas_39 | 0.01 | 22 | 81 | 0.0003   | -21.44170316 | 58.31   | 64.78   |
| tuning | Promedas_39 | 0.5  | 22 | 81 | 0.015    | -27.4523441  | 12.72   | 12.72   |
| tuning | Promedas_39 | 0.1  | 22 | 81 | 0.003    | -27.4523441  | 12.73   | 12.73   |
| tuning | Promedas_39 | 1    | 22 | 81 | 0.03     | -27.4523441  | 12.84   | 12.84   |
