# Supplementary material
Source: ML conference proceedings conference paper supplement (https://openreview.net/forum?id=FrtkfqD4bCc-)
Supplement: supplementary_material [file attachment]

|       |            |      |    |    |            |              |        |         |
|-------|------------|------|----|----|------------|--------------|--------|---------|
| final | pedigree18 | 0.1  | 22 | 21 | 0.0015459  | -125.2524302 |        | 5.46    |
| final | pedigree18 | 0.5  | 22 | 21 | 0.0077295  | -125.2524302 |        | 5.44    |
| final | pedigree18 | 1    | 22 | 21 | 0.015459   | -125.2524302 |        | 5.4     |
| final | pedigree19 | 1    | 15 | 28 | 0.057174   | -98.78974905 | 60.7   | 3614.44 |
| final | pedigree19 | 0.1  | 15 | 28 | 0.0057174  | -98.78974905 | 70.76  | 3614.38 |
| final | pedigree19 | 0.01 | 15 | 28 | 0.00057174 | -98.78974905 | 70.82  | 3614.43 |
| final | pedigree19 | 0.5  | 15 | 28 | 0.028587   | -98.78974905 | 71.23  | 3614.48 |
| final | pedigree20 | 0.5  | 16 | 27 | 0.0025     | -53.78960542 | 23.82  | 259.91  |
| final | pedigree20 | 1    | 16 | 27 | 0.005      | -53.78960542 | 23.84  | 262.87  |
| final | pedigree20 | 0.01 | 16 | 27 | 0.00005    | -53.78960542 | 23.86  | 259.5   |
| final | pedigree20 | 0.1  | 16 | 27 | 0.0005     | -53.78960542 | 23.86  | 259.97  |
| final | pedigree23 | 1    | 13 | 31 | 0.042      | -62.39164847 | 12.96  | 13.85   |
| final | pedigree23 | 0.1  | 13 | 31 | 0.0042     | -62.39164847 | 13.02  | 13.93   |
| final | pedigree23 | 0.5  | 13 | 31 | 0.021      | -62.39164847 | 13.02  | 13.93   |
| final | pedigree23 | 0.01 | 13 | 31 | 0.00042    | -62.39164847 | 13.11  | 14.1    |
| final | pedigree25 | 0.01 | 22 | 33 | 0.00018294 | -160.8424808 | 17.32  | 17.4    |
| final | pedigree25 | 1    | 22 | 33 | 0.018294   | -160.8424808 | 17.33  | 17.41   |
| final | pedigree25 | 0.1  | 22 | 33 | 0.0018294  | -160.8424808 | 17.36  | 17.44   |
| final | pedigree25 | 0.5  | 22 | 33 | 0.009147   | -160.8424808 | 17.39  | 17.47   |
| final | pedigree30 | 0.01 | 23 | 22 | 0.00015459 | -136.9502449 |        | 6.61    |
| final | pedigree30 | 0.1  | 23 | 22 | 0.0015459  | -136.9502449 |        | 6.6     |
| final | pedigree30 | 0.5  | 23 | 22 | 0.0077295  | -136.9502449 |        | 6.61    |
| final | pedigree30 | 1    | 23 | 22 | 0.015459   | -136.9502449 |        | 6.62    |
| final | pedigree31 | 1    | 17 | 35 | 0.047369   | -130.4613136 | 582.13 | 3609.85 |
| final | pedigree31 | 0.5  | 17 | 35 | 0.0236845  | -130.4613136 | 612.37 | 3609.77 |
| final | pedigree31 | 0.01 | 17 | 35 | 0.00047369 | -130.4613136 | 616.08 | 3609.78 |
| final | pedigree31 | 0.1  | 17 | 35 | 0.0047369  | -130.4613136 | 616.37 | 3609.8  |
| final | pedigree33 | 0.1  | 20 | 33 | 0.0032911  | -74.94857238 | 12.94  | 22.49   |
| final | pedigree33 | 1    | 20 | 33 | 0.032911   | -74.94857238 | 12.95  | 21.87   |
| final | pedigree33 | 0.5  | 20 | 33 | 0.0164555  | -74.94857238 | 13.05  | 22.41   |
| final | pedigree33 | 0.01 | 20 | 33 | 0.00032911 | -74.94857238 | 13.06  | 22.62   |
| final | pedigree34 | 0.1  | 17 | 35 | 0.0014011  | -111.1056175 | 142.01 | 2263.64 |
| final | pedigree34 | 0.01 | 17 | 35 | 0.00014011 | -111.1056175 | 142.61 | 2287.36 |
| final | pedigree34 | 1    | 17 | 35 | 0.014011   | -111.1056175 | 144.14 | 2315.04 |
| final | pedigree34 | 0.5  | 17 | 35 | 0.0070055  | -111.1056175 | 147.27 | 2367.98 |
| final | pedigree37 | 0.1  | 15 | 23 | 0.0002969  | -144.8819657 | 7.83   | 8.01    |
| final | pedigree37 | 0.01 | 15 | 23 | 0.00002969 | -144.8819657 | 7.86   | 8.03    |
| final | pedigree38 | 0.5  | 13 | 18 | 0.0014845  | -87.29875913 | 18.38  | 22.07   |
| final | pedigree38 | 0.1  | 13 | 18 | 0.0002969  | -87.29875913 | 18.4   | 22.1    |
| final | pedigree38 | 0.01 | 13 | 18 | 0.00002969 | -87.29875913 | 18.44  | 22.16   |
| final | pedigree38 | 1    | 13 | 18 | 0.002969   | -87.29875913 | 18.44  | 22.16   |
| final | pedigree39 | 1    | 21 | 22 | 0.010533   | -155.6080247 | 12.43  | 12.44   |
| final | pedigree39 | 0.5  | 21 | 22 | 0.0052665  | -155.6080247 | 12.44  | 12.44   |
| final | pedigree39 | 0.01 | 21 | 22 | 0.00010533 | -155.6080247 | 12.56  | 12.56   |
| final | pedigree39 | 0.1  | 21 | 22 | 0.0010533  | -155.6080247 | 12.65  | 12.66   |
| final | pedigree41 | 0.5  | 16 | 40 | 0.012695   | -121.60964   | 119.24 | 3619.08 |
| final | pedigree41 | 0.1  | 16 | 40 | 0.002539   | -121.60964   | 120.59 | 3619    |
| final | pedigree41 | 1    | 16 | 40 | 0.02539    | -121.60964   | 121.48 | 3619.18 |
| final | pedigree41 | 0.01 | 16 | 40 | 0.0002539  | -121.60964   | 122.38 | 3619.41 |
| final | pedigree42 | 0.01 | 16 | 26 | 0.00019    | -81.75945743 | 14.96  | 17.23   |
| final | pedigree42 | 0.1  | 16 | 26 | 0.0019     | -81.75945743 | 15     | 17.31   |
| final | pedigree42 | 0.5  | 16 | 26 | 0.0095     | -81.75945743 | 15.03  | 17.35   |
| final | pedigree42 | 1    | 16 | 26 | 0.019      | -81.75945743 | 15.05  | 17.35   |
| final | pedigree44 | 1    | 20 | 27 | 0.015705   | -96.9744412  | 30.44  | 58.65   |
