# Supplementary material
Source: ML conference proceedings conference paper supplement (https://openreview.net/forum?id=FrtkfqD4bCc-)
Supplement: supplementary_material [file attachment]

|       |                    |      |    |     |             |             |         |         |
|-------|--------------------|------|----|-----|-------------|-------------|---------|---------|
| final | rovers02ac.wcsp    | 1    | 6  | 34  | 0.858659    | -0.18309665 | 8.91    | 10.57   |
| final | rovers02ac.wcsp    | 0.5  | 6  | 34  | 0.429329    | -0.18309665 | 8.92    | 11.08   |
| final | rovers02ac.wcsp    | 0.01 | 6  | 34  | 0.00858659  | -0.18309665 | 8.93    | 11.07   |
| final | rovers02ac.wcsp    | 0.1  | 6  | 34  | 0.0858659   | -0.18309665 | 8.95    | 11.12   |
| final | rus_100_200_1_1    | 0.5  | 17 | 109 | 0.00000095  | 2673.311296 | 595.72  | 3656.35 |
| final | rus_100_200_1_1    | 1    | 17 | 109 | 0.0000019   | 2673.311296 | 598.13  | 3656.01 |
| final | rus_100_200_2_1    | 1    | 17 | 109 | 0.0000019   | 2581.180751 | 360.99  | 3655.92 |
| final | rus_100_200_2_1    | 0.5  | 17 | 109 | 0.00000095  | 2581.180751 | 364.71  | 3655.58 |
| final | rus_100_200_2_1    | 0.1  | 17 | 109 | 0.00000019  | 2581.180751 | 365.79  | 3656.14 |
| final | rus_100_200_2_1    | 0.01 | 17 | 109 | 0.000000019 | 2581.180751 | 374.48  | 3655.77 |
| final | rus_100_200_3_1    | 0.01 | 17 | 109 | 0.000000019 | 2531.016254 | 55.87   | 3655.82 |
| final | rus_100_200_3_1    | 0.1  | 17 | 109 | 0.00000019  | 2531.016254 | 55.92   | 3655.87 |
| final | rus_100_200_3_1    | 1    | 17 | 109 | 0.0000019   | 2531.016254 | 55.92   | 3655.86 |
| final | rus_100_200_3_1    | 0.5  | 17 | 109 | 0.00000095  | 2531.016254 | 56.06   | 3656.01 |
| final | rus_100_200_3_3    | 1    | 17 | 109 | 0.0000019   | 2398.905848 | 56.12   | 3656.07 |
| final | rus_100_200_3_3    | 0.01 | 17 | 109 | 0.000000019 | 2398.905848 | 56.17   | 3656.12 |
| final | rus_100_200_4_3    | 0.01 | 17 | 109 | 0.000000019 | 2397.942759 | 55.63   | 3655.57 |
| final | rus_100_200_4_3    | 0.5  | 17 | 109 | 0.00000095  | 2397.942759 | 55.63   | 3655.57 |
| final | rus_100_200_4_3    | 1    | 17 | 109 | 0.0000019   | 2397.942759 | 55.68   | 3655.62 |
| final | rus_100_200_4_3    | 0.1  | 17 | 109 | 0.00000019  | 2397.942759 | 55.74   | 3655.69 |
| final | rus_100_200_5_3    | 1    | 17 | 109 | 0.0000019   | 2480.470671 | 2355.02 | 3656.08 |
| final | rus_100_200_5_3    | 0.01 | 17 | 109 | 0.000000019 | 2480.470671 | 2414.95 | 3655.89 |
| final | rus_100_200_5_3    | 0.5  | 17 | 109 | 0.00000095  | 2480.470671 | 2754.28 | 3656.17 |
| final | rus_100_200_5_3    | 0.1  | 17 | 109 | 0.00000019  | 2480.470671 | 2857.73 | 3656.27 |
| final | rus_100_200_6_1    | 0.01 | 17 | 109 | 0.000000019 | 2209.053883 | 60.74   | 3655.88 |
| final | rus_100_200_6_1    | 0.1  | 17 | 109 | 0.00000019  | 2209.053883 | 60.86   | 3655.96 |
| final | rus_100_200_6_1    | 1    | 17 | 109 | 0.0000019   | 2209.053883 | 61.53   | 3656.19 |
| final | rus_100_200_6_1    | 0.5  | 17 | 109 | 0.00000095  | 2209.053883 | 62.62   | 3656.37 |
| final | rus_50_100_4_1     | 1    | 19 | 59  | 0.00000095  | 1504.532798 | 80.56   | 3624.69 |
| final | rus_50_100_4_1     | 0.01 | 19 | 59  | 9.5E-09     | 1504.532798 | 84.08   | 3624.9  |
| final | rus_50_100_4_3     | 0.1  | 19 | 59  | 0.000000095 | 1579.588793 | 2843.05 | 3624.87 |
| final | rus_50_100_4_3     | 0.5  | 19 | 59  | 0.000000475 | 1579.588793 | 2896.11 | 3624.9  |
| final | rus_50_100_4_3     | 1    | 19 | 59  | 0.00000095  | 1579.588793 | 2923.77 | 3624.85 |
| final | rus_50_100_4_3     | 0.01 | 19 | 59  | 9.5E-09     | 1579.588793 | 3349.33 | 3625.15 |
| final | rus_50_100_6_1     | 0.1  | 19 | 59  | 0.000000095 | 1324.221031 | 3506.11 | 3625.06 |
| final | rus_50_100_6_1     | 0.5  | 19 | 59  | 0.000000475 | 1322.818813 | 24.83   | 3624.81 |
| final | rus_50_100_6_1     | 0.01 | 19 | 59  | 9.5E-09     | 1322.818813 | 25.12   | 3625.1  |
| final | rus_50_100_6_1     | 1    | 19 | 59  | 0.00000095  | 1322.818813 | 25.15   | 3625.13 |
| final | rus_50_100_6_2     | 0.1  | 19 | 59  | 0.000000095 | 1617.654962 | 24.86   | 3624.78 |
| final | rus_50_100_6_2     | 1    | 19 | 59  | 0.00000095  | 1617.654962 | 24.93   | 3624.84 |
| final | rus_50_100_6_2     | 0.01 | 19 | 59  | 9.5E-09     | 1617.654962 | 25.19   | 3625.1  |
| final | rus_50_100_6_2     | 0.5  | 19 | 59  | 0.000000475 | 1617.654962 | 25.28   | 3625.2  |
| final | rus_50_100_7_1     | 0.01 | 19 | 59  | 9.5E-09     | 1501.445419 | 24.64   | 3624.63 |
| final | rus_50_100_7_1     | 0.1  | 19 | 59  | 0.000000095 | 1501.445419 | 24.9    | 3624.88 |
| final | rus_50_100_7_1     | 0.5  | 19 | 59  | 0.000000475 | 1501.445419 | 24.94   | 3624.93 |
| final | rus_50_100_7_1     | 1    | 19 | 59  | 0.00000095  | 1501.445419 | 24.99   | 3624.97 |
| final | rus_50_100_7_2     | 0.01 | 19 | 59  | 9.5E-09     | 1478.112243 | 2684.09 | 3624.73 |
| final | rus_50_100_8_1     | 1    | 19 | 59  | 0.00000095  | 1404.154017 | 3531.97 | 3625.08 |
| final | rus_50_100_9_3     | 0.01 | 19 | 59  | 9.5E-09     | 1577.992824 | 24.83   | 3624.79 |
| final | rus_50_100_9_3     | 0.5  | 19 | 59  | 0.000000475 | 1577.992824 | 24.93   | 3624.9  |
| final | rus_50_100_9_3     | 0.1  | 19 | 59  | 0.000000095 | 1577.992824 | 25.04   | 3625.01 |
| final | satellite01ac.wcsp | 1    | 8  | 19  | 0.963625    | -0.0757557  | 58.39   | 58.4    |
| final | satellite01ac.wcsp | 0.5  | 8  | 19  | 0.481813    | -0.0757557  | 58.6    | 58.61   |
| final | satellite01ac.wcsp | 0.1  | 8  | 19  | 0.0963625   | -0.0757557  | 58.67   | 58.68   |
