# Supplementary material
Source: ML conference proceedings conference paper supplement (https://openreview.net/forum?id=FrtkfqD4bCc-)
Supplement: supplementary_material [file attachment]

| AOBB-K*-b-[DH/UFO] |               |               |               |               |               |         | BBK*         |              |              |        |
|--------------------|---------------|---------------|---------------|---------------|---------------|---------|--------------|--------------|--------------|--------|
| M                  | Problem       | Algorithm     | i             | Soln          | Anytime       | Time    | wt K*        | Soln         | Time         |        |
| 3                  | d19-3-1       | AOBB-K*-b-UFO | 3             | 14.99         | <b>6.15</b>   | 621.83  | 14.99        | 14.99        | 34.00        |        |
|                    |               | AOBB-K*-b-DH  | 3             | 14.99         | <b>11.31</b>  | 56.05   | 14.99        | 14.99        | 34.00        |        |
|                    |               | AOBB-K*-b     | 4             | 14.99         | 75.99         | 76.00   | 14.99        | 14.99        | 34.00        |        |
|                    | d20-3-1       | AOBB-K*-b-UFO | 3             | 10.96         | <b>13.70</b>  | 480.77  | 10.60        | 10.96        | 1388.13      |        |
|                    |               | AOBB-K*-b-DH  | 3             | 10.96         | <b>39.67</b>  | 339.91  | 10.60        | 10.96        | 1388.13      |        |
|                    |               | AOBB-K*-b     | 4             | 10.96         | 100.02        | 100.03  | 10.60        | 10.96        | 1388.13      |        |
|                    | d21-3-1       | AOBB-K*-b-UFO | 3             | <b>11.92</b>  | <b>89.03</b>  | 628.59  | 9.37         | <b>11.72</b> | 551.27       |        |
|                    |               | AOBB-K*-b-DH  | 3             | <b>11.92</b>  | <b>136.44</b> | 1307.45 | 9.37         | <b>11.72</b> | 551.27       |        |
|                    |               | AOBB-K*-b     | 4             | <b>11.92</b>  | <b>193.83</b> | 196.52  | 9.37         | <b>11.72</b> | 551.27       |        |
|                    | d25-3-1       | AOBB-K*-b-UFO | 3             | <b>16.18</b>  | <b>14.02</b>  | 64.82   | 10.74        | <b>13.65</b> | 880.46       |        |
|                    |               | AOBB-K*-b-DH  | 3             | <b>16.18</b>  | <b>51.92</b>  | 80.22   | 10.74        | <b>13.65</b> | 880.46       |        |
|                    |               | AOBB-K*-b     | 4             | <b>16.18</b>  | <b>166.74</b> | 166.75  | 10.74        | <b>13.65</b> | 880.46       |        |
|                    | 4             | d7-4-2        | AOBB-K*-b-UFO | 3             | <b>14.89</b>  | 3391.78 | timeout      | 14.08        | <b>14.54</b> | 278.08 |
|                    |               |               | AOBB-K*-b-DH  | 3             | <b>14.49</b>  | 3543.27 | timeout      | 14.08        | <b>14.54</b> | 278.08 |
|                    |               |               | AOBB-K*-b     | 3             | <b>14.49</b>  | 3293.62 | timeout      | 14.08        | <b>14.54</b> | 278.08 |
| d13-4-1            |               | AOBB-K*-b-UFO | 3             | 15.03         | <b>12.69</b>  | 1974.43 | 13.25        | 15.03        | 46.46        |        |
|                    |               | AOBB-K*-b-DH  | 3             | 15.03         | <b>22.05</b>  | 79.88   | 13.25        | 15.03        | 46.46        |        |
|                    |               | AOBB-K*-b     | 4             | 15.03         | 165.48        | timeout | 13.25        | 15.03        | 46.46        |        |
| d17-4-1            |               | AOBB-K*-b-UFO | 3             | <b>10.86</b>  | <b>29.39</b>  | timeout | 10.52        | <b>10.80</b> | 89.94        |        |
|                    |               | AOBB-K*-b     | 4             | <b>10.86</b>  | <b>657.54</b> | timeout | 10.52        | <b>10.80</b> | 89.94        |        |
|                    |               | AOBB-K*-b-DH  | 3             | <b>10.86</b>  | 660.16        | timeout | 10.52        | <b>10.80</b> | 89.94        |        |
| d21-4-1            |               | AOBB-K*-b-UFO | 3             | <b>11.92</b>  | <b>196.30</b> | timeout | 9.37         | <b>11.72</b> | 687.66       |        |
|                    |               | AOBB-K*-b-DH  | 3             | <b>11.92</b>  | <b>614.88</b> | timeout | 9.37         | <b>11.72</b> | 687.66       |        |
|                    |               | AOBB-K*-b     | 4             | 11.72         | 264.92        | timeout | 9.37         | 11.72        | 687.66       |        |
| d43-4-1            |               | AOBB-K*-b-UFO | 3             | <b>18.19</b>  | <b>76.49</b>  | 484.69  | 18.04        | <b>18.18</b> | 119.88       |        |
|                    |               | AOBB-K*-b-DH  | 3             | <b>18.19</b>  | <b>386.49</b> | timeout | 18.04        | <b>18.18</b> | 119.88       |        |
|                    |               | AOBB-K*-b     | 3             | <b>18.19</b>  | 896.67        | timeout | 18.04        | <b>18.18</b> | 119.88       |        |
| d47-4-2            | AOBB-K*-b-UFO | 3             | <b>22.87</b>  | <b>72.53</b>  | 239.88        | 22.70   | <b>22.83</b> | 1339.15      |              |        |
|                    | AOBB-K*-b     | 3             | <b>22.74</b>  | <b>130.95</b> | timeout       | 22.70   | <b>22.83</b> | 1339.15      |              |        |
|                    | AOBB-K*-b-DH  | 3             | <b>22.74</b>  | 140.66        | timeout       | 22.70   | <b>22.83</b> | 1339.15      |              |        |
| 5                  | d7-5-1        | AOBB-K*-b-UFO | 3             | <b>15.17</b>  | 1570.30       | timeout | 14.08        | <b>14.73</b> | 401.09       |        |
|                    |               | AOBB-K*-b-DH  | 3             | 14.73         | <b>57.91</b>  | timeout | 14.08        | 14.73        | 401.09       |        |
|                    |               | AOBB-K*-b     | 3             | 14.73         | 62.53         | timeout | 14.08        | 14.73        | 401.09       |        |
|                    | d7-5-3        | AOBB-K*-b-UFO | 3             | <b>14.84</b>  | 891.90        | timeout | 14.08        | <b>15.60</b> | 205.56       |        |
|                    |               | AOBB-K*-b     | 3             | <b>14.73</b>  | <b>67.53</b>  | timeout | 14.08        | <b>15.60</b> | 205.56       |        |
|                    |               | AOBB-K*-b-DH  | 3             | <b>14.73</b>  | 156.68        | timeout | 14.08        | <b>15.60</b> | 205.56       |        |
|                    | d27-5-1       | AOBB-K*-b     | 3             | 15.55         | <b>274.30</b> | timeout | 15.48        | 15.55        | 1270.65      |        |
|                    |               | AOBB-K*-b-UFO | 3             | 15.55         | <b>276.91</b> | timeout | 15.48        | 15.55        | 1270.65      |        |
|                    |               | AOBB-K*-b-DH  | 3             | 15.55         | 321.02        | timeout | 15.48        | 15.55        | 1270.65      |        |
|                    | d31-5-1       | AOBB-K*-b-UFO | 3             | 7.88          | <b>22.35</b>  | 128.75  | 7.63         | 7.88         | 130.04       |        |
|                    |               | AOBB-K*-b     | 3             | 7.88          | <b>129.43</b> | timeout | 7.63         | 7.88         | 130.04       |        |
|                    |               | AOBB-K*-b-DH  | 3             | 7.88          | 145.63        | timeout | 7.63         | 7.88         | 130.04       |        |
|                    | d47-5-1       | AOBB-K*-b-UFO | 3             | <b>23.08</b>  | 2068.22       | timeout | 22.70        | <b>23.05</b> | timeout      |        |
|                    |               | AOBB-K*-b     | 3             | <b>22.74</b>  | <b>222.66</b> | timeout | 22.70        | <b>23.05</b> | timeout      |        |
|                    |               | AOBB-K*-b-DH  | 3             | <b>22.74</b>  | 241.88        | timeout | 22.70        | <b>23.05</b> | timeout      |        |
