# Supplementary material
Source: ML conference proceedings conference paper supplement (https://openreview.net/forum?id=FrtkfqD4bCc-)
Supplement: supplementary_material [file attachment]

|        |             |      |    |    |           |              |        |        |
|--------|-------------|------|----|----|-----------|--------------|--------|--------|
| tuning | Promedas_40 | 0.01 | 23 | 59 | 0.0003    | -7.276119098 | 64.07  | 68.06  |
| tuning | Promedas_40 | 0.1  | 23 | 59 | 0.003     | -9.676675919 | 12.29  | 12.32  |
| tuning | Promedas_40 | 1    | 23 | 59 | 0.03      | -12.23703192 | 12.44  | 12.44  |
| tuning | Promedas_40 | 0.5  | 23 | 59 | 0.015     | -12.23703192 | 12.48  | 12.48  |
| tuning | Promedas_41 | 0.01 | 23 | 49 | 0.0003    | -9.665616662 | 11.76  | 13.15  |
| tuning | Promedas_41 | 0.1  | 23 | 49 | 0.003     | -15.13222135 | 11.19  | 11.2   |
| tuning | Promedas_41 | 0.5  | 23 | 49 | 0.015     | -15.2663926  | 11.05  | 11.05  |
| tuning | Promedas_41 | 1    | 23 | 49 | 0.03      | -15.2663926  | 11.17  | 11.17  |
| tuning | Promedas_42 | 0.01 | 23 | 72 | 0.0003    | -12.96610798 | 53.41  | 64.35  |
| tuning | Promedas_42 | 0.1  | 23 | 72 | 0.003     | -17.32534913 | 16.47  | 16.69  |
| tuning | Promedas_42 | 1    | 23 | 72 | 0.03      | -22.8961975  | 16.1   | 16.1   |
| tuning | Promedas_42 | 0.5  | 23 | 72 | 0.015     | -22.8961975  | 16.35  | 16.35  |
| tuning | Promedas_43 | 0.01 | 24 | 36 | 0.000002  | -7.51856682  | 17.5   | 17.5   |
| tuning | Promedas_43 | 0.1  | 24 | 36 | 0.00002   | -7.51866322  | 16.76  | 16.76  |
| tuning | Promedas_43 | 0.5  | 24 | 36 | 0.0001    | -7.519761043 | 16.1   | 16.1   |
| tuning | Promedas_43 | 1    | 24 | 36 | 0.0002    | -7.522979786 | 12.94  | 12.94  |
| tuning | Promedas_44 | 0.01 | 23 | 61 | 0.0003    | -9.210246694 | 54.04  | 58.2   |
| tuning | Promedas_44 | 0.1  | 23 | 61 | 0.003     | -11.22784733 | 14.15  | 14.22  |
| tuning | Promedas_44 | 1    | 23 | 61 | 0.03      | -15.27959963 | 14.06  | 14.06  |
| tuning | Promedas_44 | 0.5  | 23 | 61 | 0.015     | -15.27959963 | 14.15  | 14.16  |
| tuning | Promedas_45 | 0.01 | 23 | 43 | 0.0003    | -7.715158173 | 14.01  | 14.17  |
| tuning | Promedas_45 | 0.1  | 23 | 43 | 0.003     | -7.722996025 | 12.33  | 12.34  |
| tuning | Promedas_45 | 1    | 23 | 43 | 0.03      | -7.725153079 | 12.15  | 12.15  |
| tuning | Promedas_45 | 0.5  | 23 | 43 | 0.015     | -7.725153079 | 12.27  | 12.27  |
| tuning | Promedas_46 | 0.01 | 23 | 43 | 0.000002  | -12.78520305 | 162.06 | 162.06 |
| tuning | Promedas_46 | 0.1  | 23 | 43 | 0.00002   | -12.7852506  | 137.92 | 137.92 |
| tuning | Promedas_46 | 0.5  | 23 | 43 | 0.0001    | -13.02139802 | 85.29  | 85.29  |
| tuning | Promedas_46 | 1    | 23 | 43 | 0.0002    | -13.02480146 | 25.6   | 25.6   |
| tuning | Promedas_47 | 0.01 | 23 | 54 | 0.0003    | -13.94907804 | 15.38  | 17.36  |
| tuning | Promedas_47 | 0.1  | 23 | 54 | 0.003     | -14.01088816 | 11.68  | 11.69  |
| tuning | Promedas_47 | 0.5  | 23 | 54 | 0.015     | -14.01312377 | 11.68  | 11.68  |
| tuning | Promedas_47 | 1    | 23 | 54 | 0.03      | -21.36225777 | 11.65  | 11.65  |
| tuning | Promedas_48 | 0.01 | 23 | 66 | 0.0000236 | -10.70478042 | 790.9  | 791.83 |
| tuning | Promedas_48 | 0.1  | 23 | 66 | 0.000236  | -10.93740864 | 40.41  | 40.94  |
| tuning | Promedas_48 | 0.5  | 23 | 66 | 0.00118   | -10.94888508 | 16.6   | 16.64  |
| tuning | Promedas_48 | 1    | 23 | 66 | 0.00236   | -10.94979806 | 14.8   | 14.82  |
| tuning | Promedas_49 | 0.01 | 23 | 39 | 0.0003    | -8.364486819 | 15.03  | 15.55  |
| tuning | Promedas_49 | 0.1  | 23 | 39 | 0.003     | -11.39005571 | 10.35  | 10.36  |
| tuning | Promedas_49 | 1    | 23 | 39 | 0.03      | -12.21657807 | 10.01  | 10.01  |
| tuning | Promedas_49 | 0.5  | 23 | 39 | 0.015     | -12.21657807 | 10.29  | 10.29  |
| tuning | Promedas_50 | 0.01 | 23 | 46 | 0.0003    | -9.154473446 | 17.52  | 17.6   |
| tuning | Promedas_50 | 0.1  | 23 | 46 | 0.003     | -9.165364761 | 13.37  | 13.37  |
| tuning | Promedas_50 | 0.5  | 23 | 46 | 0.015     | -9.167521815 | 13.42  | 13.43  |
| tuning | Promedas_50 | 1    | 23 | 46 | 0.03      | -9.167521815 | 13.43  | 13.43  |
| tuning | Promedas_51 | 0.01 | 24 | 33 | 0.0003    | -12.28640696 | 13.34  | 13.65  |
| tuning | Promedas_51 | 0.1  | 24 | 33 | 0.003     | -12.9141625  | 13.06  | 13.06  |
| tuning | Promedas_51 | 0.5  | 24 | 33 | 0.015     | -15.26168211 | 13.18  | 13.18  |
| tuning | Promedas_51 | 1    | 24 | 33 | 0.03      | -15.26168211 | 13.19  | 13.19  |
| tuning | Promedas_52 | 0.01 | 23 | 38 | 0.000002  | -10.77172669 | 15.7   | 17.43  |
| tuning | Promedas_52 | 0.1  | 23 | 38 | 0.00002   | -10.77175418 | 15.53  | 17.19  |
| tuning | Promedas_52 | 0.5  | 23 | 38 | 0.0001    | -10.77196806 | 13.71  | 14.95  |
| tuning | Promedas_52 | 1    | 23 | 38 | 0.0002    | -10.77316962 | 11.56  | 12.03  |
| tuning | Promedas_53 | 0.01 | 23 | 63 | 0.0003    | -9.246698893 | 15.27  | 16.27  |
| tuning | Promedas_53 | 0.1  | 23 | 63 | 0.003     | -9.251196182 | 13.01  | 13.02  |
