# Supplementary material
Source: ML conference proceedings conference paper supplement (https://openreview.net/forum?id=FrtkfqD4bCc-)
Supplement: supplementary_material [file attachment]

|        |             |      |    |    |          |              |         |         |
|--------|-------------|------|----|----|----------|--------------|---------|---------|
| tuning | Promedas_31 | 0.1  | 22 | 79 | 0.003    | -21.35301736 | 11      | 11      |
| tuning | Promedas_31 | 1    | 22 | 79 | 0.03     | -21.35301736 | 11.13   | 11.13   |
| tuning | Promedas_31 | 0.5  | 22 | 79 | 0.015    | -21.35301736 | 11.17   | 11.17   |
| tuning | Promedas_32 | 0.01 | 22 | 86 | 0.0003   | -13.87503279 | 2474.6  | 2587.33 |
| tuning | Promedas_32 | 0.1  | 22 | 86 | 0.003    | -20.36794946 | 14.16   | 14.49   |
| tuning | Promedas_32 | 0.5  | 22 | 86 | 0.015    | -24.41370695 | 14.13   | 14.13   |
| tuning | Promedas_32 | 1    | 22 | 86 | 0.03     | -24.41370695 | 14.15   | 14.15   |
| tuning | Promedas_33 | 0.01 | 23 | 51 | 0.0003   | -15.81074796 | 67.06   | 69.56   |
| tuning | Promedas_33 | 0.5  | 23 | 51 | 0.015    | -21.35309957 | 12.88   | 12.88   |
| tuning | Promedas_33 | 1    | 23 | 51 | 0.03     | -21.35309957 | 12.88   | 12.88   |
| tuning | Promedas_33 | 0.1  | 23 | 51 | 0.003    | -21.35309957 | 12.9    | 12.9    |
| tuning | Promedas_34 | 1    | 22 | 83 | 0.0002   | -17.02286656 | 2561.79 | 2942.6  |
| tuning | Promedas_34 | 0.5  | 22 | 83 | 0.0001   | -20.10786643 | 2949.01 | 3609.91 |
| tuning | Promedas_34 | 0.1  | 22 | 83 | 0.00002  | -21.85114045 | 2820.17 | 3609.93 |
| tuning | Promedas_34 | 0.01 | 22 | 83 | 0.000002 | -21.85114045 | 3044.83 | 3609.85 |
| tuning | Promedas_35 | 1    | 23 | 45 | 0.0002   | -11.25554358 | 128.19  | 128.19  |
| tuning | Promedas_35 | 0.5  | 23 | 45 | 0.0001   | -11.25554358 | 464.41  | 464.41  |
| tuning | Promedas_35 | 0.1  | 23 | 45 | 0.00002  | -11.25554358 | 691.16  | 691.16  |
| tuning | Promedas_35 | 0.01 | 23 | 45 | 0.000002 | -11.25554358 | 714.62  | 714.62  |
| tuning | Promedas_36 | 0.01 | 22 | 73 | 0.0003   | -8.179995883 | 130.86  | 154.84  |
| tuning | Promedas_36 | 0.1  | 22 | 73 | 0.003    | -12.54004588 | 11.99   | 12.15   |
| tuning | Promedas_36 | 0.5  | 22 | 73 | 0.015    | -15.26878527 | 11.94   | 11.94   |
| tuning | Promedas_36 | 1    | 22 | 73 | 0.03     | -15.26878527 | 11.97   | 11.97   |
| tuning | Promedas_37 | 0.01 | 23 | 68 | 0.0003   | -15.41397244 | 78.2    | 89.89   |
| tuning | Promedas_37 | 0.1  | 23 | 68 | 0.003    | -24.4015216  | 16.01   | 16.01   |
| tuning | Promedas_37 | 1    | 23 | 68 | 0.03     | -24.4015216  | 16.1    | 16.1    |
| tuning | Promedas_37 | 0.5  | 23 | 68 | 0.015    | -24.4015216  | 16.16   | 16.16   |
| tuning | Promedas_38 | 0.01 | 24 | 53 | 0.0003   | -12.15945549 | 48.71   | 52.22   |
| tuning | Promedas_38 | 0.5  | 24 | 53 | 0.015    | -16.78691875 | 17.24   | 17.24   |
| tuning | Promedas_38 | 0.1  | 24 | 53 | 0.003    | -16.78691875 | 17.37   | 17.37   |
| tuning | Promedas_38 | 1    | 24 | 53 | 0.03     | -16.78691875 | 17.4    | 17.4    |
| tuning | Promedas_39 | 0.01 | 22 | 83 | 0.0003   | -21.45614348 | 200.32  | 294.86  |
| tuning | Promedas_39 | 0.1  | 22 | 83 | 0.003    | -27.4523441  | 11      | 11      |
| tuning | Promedas_39 | 0.5  | 22 | 83 | 0.015    | -27.4523441  | 11.02   | 11.02   |
| tuning | Promedas_39 | 1    | 22 | 83 | 0.03     | -27.4523441  | 11.03   | 11.03   |
| tuning | Promedas_40 | 0.01 | 23 | 57 | 0.0003   | -7.288980039 | 48.8    | 58.32   |
| tuning | Promedas_40 | 0.1  | 23 | 57 | 0.003    | -9.680881401 | 13.53   | 13.54   |
| tuning | Promedas_40 | 0.5  | 23 | 57 | 0.015    | -12.23703192 | 13.45   | 13.45   |
| tuning | Promedas_40 | 1    | 23 | 57 | 0.03     | -12.23703192 | 13.51   | 13.51   |
| tuning | Promedas_41 | 0.01 | 23 | 57 | 0.0003   | -9.678987086 | 14.64   | 14.74   |
| tuning | Promedas_41 | 0.1  | 23 | 57 | 0.003    | -15.1397132  | 13.35   | 13.36   |
| tuning | Promedas_41 | 0.5  | 23 | 57 | 0.015    | -15.2663926  | 13.29   | 13.29   |
| tuning | Promedas_41 | 1    | 23 | 57 | 0.03     | -15.2663926  | 13.35   | 13.35   |
| tuning | Promedas_42 | 0.01 | 23 | 77 | 0.0003   | -12.98565935 | 64.35   | 66.48   |
| tuning | Promedas_42 | 0.1  | 23 | 77 | 0.003    | -17.33192607 | 16.1    | 16.16   |
| tuning | Promedas_42 | 1    | 23 | 77 | 0.03     | -22.8961975  | 15.82   | 15.82   |
| tuning | Promedas_42 | 0.5  | 23 | 77 | 0.015    | -22.8961975  | 15.84   | 15.84   |
| tuning | Promedas_43 | 1    | 25 | 39 | 0.0002   | -7.536268806 | 13.08   | 13.08   |
| tuning | Promedas_43 | 0.1  | 25 | 39 | 0.00002  | -7.536268806 | 14.58   | 14.58   |
| tuning | Promedas_43 | 0.5  | 25 | 39 | 0.0001   | -7.536268806 | 14.67   | 14.67   |
| tuning | Promedas_43 | 0.01 | 25 | 39 | 0.000002 | -7.536268806 | 14.76   | 14.76   |
| tuning | Promedas_44 | 0.01 | 23 | 56 | 0.0003   | -9.265008913 | 17.81   | 30.31   |
| tuning | Promedas_44 | 0.1  | 23 | 56 | 0.003    | -11.23384214 | 13.71   | 13.75   |
| tuning | Promedas_44 | 0.5  | 23 | 56 | 0.015    | -15.27959963 | 13.62   | 13.62   |
